# Supplementary material for: Myosin II regulatory light chain phosphorylation and formin availability modulate cytokinesis upon changes in carbohydrate metabolism
Source: eLife journal article supplement (doi:10.7554/elife.83285), 2023-02-24
Supplement: supp [file Figure 1 source data.xlsx]

## Sheet: Figure 1B
	%Cells with nodes			%Cells with mature rings			%Cells with constricting rings
Time (min)	Replicate 1	Replicate 2	Replicate 3	Replicate 1	Replicate 2	Replicate 3	Replicate 1	Replicate 2	Replicate 3
0	2	0	2	0	0	0	0	0	0
10	66	62	76	30	32	38	0	0	0
20	24	20	30	68	64	76	0	2	0
30	2	0	2	42	52	58	52	40	40
40	0	0	0	22	24	32	62	68	72
50	0	0	0	6	0	10	72	76	78
60	0	0	0	0	0	0	20	2	6
70	0	0	0	0	0	0	6	0	2
80	0	0	0	0	0	0	0	0	0
90	0	0	0	0	0	0	0	0	0

## Sheet: Figure 1C
		Time (minutes)							Time (minutes)							Time (minutes)							µm/min
		Ring assembly and contraction							Node condensation and ring maturation							Ring constriction and dissasembly							Ring constriction rate
	cell number	Rlc1-GFP (WT)		Rlc1(S35A)-GFP		Rlc1(S35D)-GFP			Rlc1-GFP (WT)		Rlc1(S35A)-GFP		Rlc1(S35D)-GFP			Rlc1-GFP (WT)		Rlc1(S35A)-GFP		Rlc1(S35D)-GFP			Rlc1-GFP (WT)		Rlc1(S35A)-GFP		Rlc1(S35D)-GFP
	1	40		42.5		40		1	17.5		17.5		17.5		1	12.5		15		12.5		1	0.626603		0.607857		0.593173
	2	40		40		40		2	17.5		17.5		20		2	12.5		15		12.5		2	0.596302		0.615221		0.616239
	3	40		42.5		40		3	20		17.5		20		3	12.5		15		12.5		3	0.589389		0.601254		0.593854
	4	42.5		42.5		40		4	20		17.5		20		4	15		15		12.5		4	0.617723		0.572881		0.602451
	5	42.5		42.5		40		5	20		20		20		5	15		15		15		5	0.588711		0.575421		0.60599
	6	42.5		42.5		40		6	20		20		20		6	15		15		15		6	0.58276		0.603433		0.622642
	7	42.5		42.5		40		7	20		20		20		7	15		15		15		7	0.645888		0.577574		0.626865
	8	42.5		45		40		8	20		20		22.5		8	17.5		17.5		15		8	0.634984		0.602339		0.632829
	9	42.5		45		40		9	20		20		22.5		9	17.5		17.5		15		9	0.641012		0.577587		0.587095
	10	42.5		42.5		42.5		10	22.5		20		22.5		10	17.5		17.5		15		10	0.585673		0.624541		0.647305
	11	42.5		42.5		42.5		11	22.5		22.5		22.5		11	17.5		17.5		17.5		11	0.617		0.568273		0.621347
	12	42.5		42.5		42.5		12	22.5		22.5		22.5		12	17.5		17.5		17.5		12	0.648317		0.576933		0.607622
	13	42.5		42.5		42.5		13	22.5		22.5		22.5		13	17.5		17.5		17.5		13	0.605063		0.589375		0.622906
	14	42.5		42.5		42.5		14	22.5		22.5		22.5		14	17.5		17.5		17.5		14	0.598933		0.595345		0.642229
	15	42.5		45		42.5		15	25		22.5		25		15	17.5		20		17.5		15	0.632223		0.59957		0.626415
	16	42.5		45		42.5		16	25		22.5		25		16	17.5		20		17.5		16	0.610316		0.587939		0.594215
	17	42.5		45		42.5		17	25		22.5		25		17	17.5		20		17.5		17	0.627143		0.567937		0.626065
	18	42.5		45		42.5		18	25		22.5		25		18	17.5		20		17.5		18	0.621482		0.628524		0.648999
	19	42.5		45		42.5		19	25		22.5		25		19	17.5		20		17.5		19	0.613673		0.625795		0.60548
	20	42.5		45		42.5		20	25		22.5		25		20	17.5		20		17.5		20	0.60058		0.592119		0.628075
	21	42.5		45		42.5		21	25		25		25		21	17.5		20		17.5		21	0.619309		0.572866		0.58119
	22	42.5		45		42.5		22	25		25		25		22	17.5		20		17.5		22	0.632707		0.595324		0.639302
	23	42.5		45		42.5		23	25		25		25		23	17.5		20		17.5		23	0.646325		0.571682		0.605834
	24	42.5		45		42.5		24	25		25		25		24	17.5		20		17.5		24	0.629472		0.62661		0.586927
	25	45		45		42.5		25	25		25		25		25	20		20		17.5		25	0.6015		0.606704		0.637724
	26	45		45		42.5		26	25		27.5		27.5		26	20		20		17.5		26	0.641616		0.614137		0.584737
	27	45		45		42.5		27	25		27.5		27.5		27	20		20		20		27	0.612424		0.604242		0.582287
	28	45		45		45		28	25		27.5		27.5		28	20		20		20		28	0.580662		0.584998		0.601903
	29	45		45		45		29	25		27.5		27.5		29	20		20		20		29	0.646833		0.57116		0.631414
	30	45		47.5		45		30	27.5		27.5		27.5		30	20		20		20		30	0.592236		0.627278		0.610955
	31	45		47.5		45		31	27.5		27.5		27.5		31	20		20		20
	32			47.5		45		32	27.5		27.5				32			20		20
		42.82		44.22		41.51		Mean	23.15		23.83		22.89		Mean	17.26		18.36		16.88		Mean	0.6162		0.5955		0.6138		Mean
		1.406		1.732		3.91		Std. Deviation	2.736		2.839		3.306		Std. Deviation	2.175		2.068		2.29		Std. Deviation	0.02121		0.0198		0.02036		Std. Deviation
		pvalue		0.009		0.107			pvalue		0.335		0.7408			pvalue		0.04		0.1309			pvalue		0.009		0.107
		Significantly different?		**		ns			Significantly different?		ns		ns			Significantly different?		*		ns			Significantly different?		**		ns

## Sheet: Figure 1F
		Time (minutes)							Time (minutes)							Time (minutes)							µm/min
		Ring assembly and contraction							Node condensation and ring maturation							Ring constriction and dissasembly							Ring constriction rate
	cell number	Rlc1-GFP (WT)		Rlc1(S35A)-GFP		Rlc1(S35D)-GFP			Rlc1-GFP (WT)		Rlc1(S35A)-GFP		Rlc1(S35D)-GFP			Rlc1-GFP (WT)		Rlc1(S35A)-GFP		Rlc1(S35D)-GFP			Rlc1-GFP (WT)		Rlc1(S35A)-GFP		Rlc1(S35D)-GFP
	1	45		45		45		1	20		20		20		1	15		25		15		1	0.489103		0.359173		0.504085
	2	45		45		45		2	20		20		20		2	15		25		15		2	0.500043		0.359713		0.51381
	3	45		50		45		3	20		25		20		3	15		25		15		3	0.474355		0.391246		0.52067
	4	45		50		45		4	20		25		20		4	15		25		15		4	0.517564		0.408181		0.504126
	5	45		55		45		5	20		25		20		5	15		25		15		5	0.48021		0.39858		0.470876
	6	45		55		45		6	20		25		25		6	15		30		15		6	0.481706		0.391881		0.484462
	7	45		60		50		7	20		25		25		7	15		30		15		7	0.48743		0.380791		0.530298
	8	45		60		50		8	25		25		25		8	15		30		15		8	0.502327		0.356489		0.5024
	9	45		60		50		9	25		25		25		9	15		30		15		9	0.47516		0.373183		0.501914
	10	45		60		50		10	25		25		25		10	15		30		15		10	0.522488		0.379424		0.518896
	11	45		60		50		11	25		25		25		11	15		30		15		11	0.515584		0.350481		0.484833
	12	45		60		50		12	25		30		25		12	15		30		15		12	0.525887		0.408209		0.529285
	13	45		60		50		13	25		30		25		13	15		30		15		13	0.538321		0.395332		0.513925
	14	45		60		50		14	25		30		25		14	20		30		15		14	0.499842		0.377555		0.510043
	15	45		60		50		15	25		30		25		15	20		30		15		15	0.511944		0.396389		0.478068
	16	45		60		50		16	25		30		25		16	20		35		15		16	0.534829		0.358189		0.477248
	17	45		60		50		17	25		30		25		17	20		35		15		17	0.510643		0.401741		0.514264
	18	45		60		50		18	25		30		25		18	20		35		15		18	0.519622		0.396037		0.510699
	19	45		60		50		19	25		30		25		19	20		35		20		19	0.498726		0.356529		0.478454
	20	45		60		50		20	25		30		25		20	20		35		20		20	0.496784		0.362717		0.534065
	21	45		60		50		21	25		30		25		21	20		35		20		21	0.501424		0.393975		0.51651
	22	45		65		50		22	25		30		25		22	20		35		20		22	0.497875		0.387262		0.494711
	23	45		65		50		23	25		30		25		23	20		35		20		23	0.479713		0.375915		0.490495
	24	45		65		50		24	25		35		25		24	20		35		20		24	0.526441		0.387895		0.531936
	25	45		65		50		25	25		35		25		25	20		35		20		25	0.475593		0.418654		0.495961
	26	45		65		50		26	25		35		25		26	20		35		20		26	0.490806		0.392008		0.47708
	27	45		65		50		27	25		35		25		27	20		35		20		27	0.500274		0.366536		0.47124
	28	45		65		50		28	25		35		25		28	20		40		20		28	0.475658		0.386084		0.500735
	29	45		65		50		29	25		35		25		29	20		40		20		29	0.471166		0.414146		0.5313
	30	50		65		50		30	25		35		25		30	20		40		20		30	0.489716		0.406153		0.495455
	31	50		65		50		31	25		35		25		31	20		45		20
	32	50		70		50		32	25		35		25		32	20		45		20
	33	50		70		50		33	25		35		25		33	20		45		20
	34	50		75		50		34	25		35		25		34	20		45		20
	35	50		75		50		35	25		35		25		35	20		45		20			0.4997		0.3843		0.5029		Mean
	36	50		80		50		36	25				25		36	20				20			0.01918		0.01907		0.01936		Std. Deviation
	37	50				50		37	25				25		37	20				20			pvalue		<0,0001		0.5201
	38	50				50		38	25				25		38	20				20			Significantly different?		****		ns
	39	50				50		39	25				25		39	20				20
	40	50				50		40	25				25		40	20				20
	41	50				50		41	25				25		41	20				20
	42	50				50		42	25				25		42	20				20
	43	50				50		43	25				25		43	20				20
	44	50				50		44	25				25		44	20				20
	45	50				50		45	25				25		45	20				20
	46	50				50		46	25				30		46	20				20
	47	50				50		47	25				30		47	25				20
	48	50				50		48	25				30		48	25				20
	49	50				50		49	25				30		49	25				20
	50	50				50		50	25				30		50	25				20
	51	50				50		51	25				30		51	25				20
	52	50				55		52	25				30		52	25				20
	53	50				55		53	25				30		53	25				20
	54	50				55		54	25				30		54	25				20
	55	50				55		55	25				30		55	25				20
	56	50				55		56	25				30		56	25				20
	57	50				55		57	25				30		57	25				25
	58	50				55		58	25				30		58	25				25
	59	50				55		59	25				30		59	25				25
	60	50				55		60	25				30		60	25				25
	61	50				55		61	25				30		61	25				25
	62	50				55		62	25				30		62	25				25
	63	50				55		63	25				30		63	25				25
	64	50				55		64	30				30		64	25				25
	65	50				55		65	30				30		65	25				25
	66	55				55		66	30				30		66	25				25
	67	55						67	30						67	25
	68	55						68	30						68	25
	69	55						69	35						69	25
	70	55						70	35						70	25
	71	55						71	35						71	25
	72	55						72	35						72	25
	73	55						73	35						73	25
	74	55						74	35						74	25
	75	55						75	35						75	25
	76	55						76	35						76	25
	77	55						77	35						77	25
	78	55						78	35						78	25
	79	55						79	35						79	25
	80	55						80	35						80	25
	81	55						81	35						81	25
	82	55						82	35						82	25
		49.27		61.67		50.68		Mean	23.15		23.83		22.89		Mean	17.26		18.36		16.88		Mean
		3.695		7.368		2.758		Std. Deviation	2.736		2.839		3.306		Std. Deviation	2.175		2.068		2.29		Std. Deviation
		pvalue		<0,0001		0.1398			pvalue		0.006		0.6021			pvalue		<0,0001		0.3547
		Significantly different?		****		ns			Significantly different?		***		ns			Significantly different?		****		ns
