# Supplementary material for: Myosin II regulatory light chain phosphorylation and formin availability modulate cytokinesis upon changes in carbohydrate metabolism
Source: eLife journal article supplement (doi:10.7554/elife.83285), 2023-02-24
Supplement: supp [file Figure 1 Supplement 1 source data.xlsx]

## Sheet: Figure 1 Sumplement 1A
	Septated cells			Multiseptated cells
	MM1 (WT)	rlc1Δ	Rlc1-GFP (WT)	MM1 (WT)	rlc1Δ	Rlc1-GFP (WT)
Replicate 1	3.9604	19.8113	3.15789	0	5.66038	0
Replicate 2	4.85437	27.6191	5.82524	0	4.7619	0
Replicate 3	4.12371	26	6.60377	0	8	0
Mean	4.31283	24.4768	5.19564	0	6.14076	0
Std. Deviation	0.476046	4.12071	1.80716	0	1.67164	0

## Sheet: Figure 1 Suplement 1D
	OD600							Multiseptated cells							Lysed cells
	Wild type			rlc1(S35A)				Wild type			rlc1(S35A)				Wild type			rlc1(S35A)
Time (hours)	Replicate 1	Replicate 2	Replicate 3	Replicate 1	Replicate 2	Replicate 3	Time (hours)	Replicate 1	Replicate 2	Replicate 3	Replicate 1	Replicate 2	Replicate 3	Time (hours)	Replicate 1	Replicate 2	Replicate 3	Replicate 1	Replicate 2	Replicate 3
0	0.48	0.51	0.47	0.42	0.45	0.51	0	0	0	0	0	0	0.46083	0	0	0	0	0	1.15607	0
2	0.61	0.67	0.55	0.59	0.63	0.49	2	0	0	0	0	0	0	2	0	0.956938	0	0.900901	0.840336	2.35849
4	0.75	0.66	0.79	0.68	0.63	0.69	4	0	0.588235	0	1.20482	1.31579	1.41463	4	0.4578	1.17647	2.48756	3.21928	1.75439	3.31707
6	1.3	1.26	1.06	0.82	0.77	0.91	6	0	0.60241	0.925926	2.30415	3.14465	1.9505	6	1.12478	1.20482	2.31481	1.38249	3.03145	1.9802
8	1.53	1.36	1.65	0.91	0.98	1.03	8	0.31457	0	0.78125	1.55039	2.47934	1.32159	8	1.394	1.60428	1.95312	4.65116	3.30579	0.881057
10	1.94	1.66	1.8	1.06	1.12	1.21	10	0	0.442478	0.873362	2.39234	2.39044	3.54331	10	1.54579	0.884956	2.18341	3.82775	3.58566	2.75591
12	2.57	2.3	2.42	1.22	1.34	1.38	12	0	0.396825	0	2.1811	3.26531	3.5641	12	2.00005	1.98413	1.14504	3.14961	4.04082	3.5641
14	3.06	3.15	3.01	1.28	1.35	1.45	14	0.1111	0	0	5.02513	5.93607	3.11419	14	1.33378	1.6129	1.96078	4.03015	4.30594	5.99654
16	3.54	3.63	3.32	1.37	1.35	1.47	16	0	0.487805	0	2.94118	3.52423	5.61798	16	1.24155	0.97561	1.97629	3.92157	7.04846	5.24345
18	3.86	3.91	3.55	1.31	1.34	1.37	18	0	0	0.384615	7.40741	3.43511	5.51181	18	2.35265	1.15385	0.384615	4.93827	7.25191	6.29921
20	4.21	4	4.37	1.26	1.25	1.32	20	0.265459	1.04167	0	7.69231	5	5.26582	20	1.99741	1.04167	1.87266	4.8583	7.33333	6.12658
22	5.18	4.96	5.42	1.18	1.2	1.33	22	0	0	0	6.60793	8.13008	2.6087	22	2.99974	1.14942	3.93013	5.28634	5.69106	7.3913
24	4.72	5.31	5.09	1.19	1.11	1.31	24	0	0	0	5.15054	4.22581	6.83453	24	1.33589	3.57143	4.0404	17.9212	12.9032	9.35252
