# Supplementary material for: Myosin II regulatory light chain phosphorylation and formin availability modulate cytokinesis upon changes in carbohydrate metabolism
Source: eLife journal article supplement (doi:10.7554/elife.83285), 2023-02-24
Supplement: supp [file Figure 1 Supplement 2 source data.xlsx]

## Sheet: Figure 1 Supplement 2
	Time (minutes)										Time (minutes)										Time (minutes)
	Ring assembly and contraction										Node condensation and ring maturation										Ring constriction and dissasembly
cell number	Rlc1-GFP (WT)		Rlc1(S35A)-GFP		myo51Δ		myo51Δ Rlc1(S35A)-GFP				Rlc1-GFP (WT)		Rlc1(S35A)-GFP		myo51Δ		myo51Δ Rlc1(S35A)-GFP				Rlc1-GFP (WT)		Rlc1(S35A)-GFP		myo51Δ		myo51Δ Rlc1(S35A)-GFP
1	45		50		45		55			1	20		25		30		25			1	15		20		15		25
2	45		50		45		55			2	20		25		30		25			2	15		20		15		30
3	45		55		45		55			3	20		25		30		30			3	15		25		15		30
4	45		55		45		55			4	20		25		30		30			4	15		25		15		30
5	50		55		50		55			5	20		25		30		30			5	15		25		15		30
6	50		55		50		60			6	20		25		30		30			6	15		25		20		30
7	50		55		50		60			7	20		25		30		30			7	20		30		20		30
8	50		60		50		60			8	20		25		30		30			8	20		30		20		30
9	50		60		50		60			9	20		25		30		30			9	20		30		20		30
10	50		60		50		65			10	20		25		30		30			10	20		30		20		30
11	50		60		50		65			11	20		25		30		35			11	20		30		20		30
12	50		60		50		65			12	20		25		30		35			12	20		30		20		35
13	50		60		50		65			13	25		25		30		35			13	20		30		20		35
14	50		60		50		65			14	25		25		30		35			14	20		30		20		35
15	50		60		50		70			15	25		30		30		35			15	20		30		20		35
16	50		60		50		70			16	25		30		30		40			16	20		30		20		35
17	50		60		50		70			17	25		30		30		40			17	20		30		20		35
18	50		60		50		70			18	25		30		30		40			18	20		35		20		35
19	50		60		50		70			19	25		30		30		40			19	20		35		20		35
20	50		60		50		70			20	25		30		30		40			20	20		35		20		35
21	50		60		50		70			21	25		30		30		40			21	20		35		20		35
22	50		65		50		75			22	25		30		30		40			22	20		35		20		35
23	50		65		50		75			23	25		35		30		40			23	20		35		20		35
24	50		65		50		75			24	25		35		30		40			24	20		35		20		35
25	50		65		55		75			25	25		35		30		40			25	20		35		20		35
26	50		65		55		75			26	25		35		30		40			26	20		35		20		35
27	50		65		55		80			27	25		35		30		40			27	20		35		20		40
28	50		65		55		80			28	25		35		30		40			28	20		35		20		40
29	50		65		55		80			29	25		35		30		40			29	20		35		20		40
30	50		70		55		80			30	25		35		30		40			30	20		35		20		40
31	50		70		55		80			31	25		35		30		40			31	20		35		20		40
32	50		75		55		80			32	25		35		35		40			32	20		35		20		40
33	50		75		55					33	30				35					33	20		35		20
34	50		75		55					34	30				35					34	20		35		20
35	50				55					35	30				35					35	20				20
36	50				55					36	30				35					36	20				20
37	50				55					37	30				35					37	20				20
38	50				55					38	30				35					38	20				20
39	50				55					39	30				35					39	20				20
40	50				55					40	30				35					40	20				20
41	50				55					41	30				35					41	20				20
42	50				55					42	30				35					42	20				20
43	50				55					43	30				35					43	20				20
44	50				55					44	30				35					44	20				20
45	50				55					45	30				35					45	20				20
46	50				55					46	30				35					46	20				20
47	50				55					47	30				35					47	20				20
48	50				55					48	30				35					48	20				20
49	50				55					49	30				35					49	20				20
50	50				55					50	30				35					50	20				20
51	50				55					51	30				35					51	20				20
52	50				55					52	30				35					52	25				20
53	50				55					53	30				35					53	25				20
54	50				55					54	30				35					54	25				20
55	50				55					55	30				35					55	25				25
56	50				55					56	30				35					56	25				25
57	50				55					57	30				40					57	25				25
58	50				55					58	30				40					58	25				25
59	50				55					59	30				40					59	25				25
60	55				55					60	30				40					60	25				25
	49.75		61.76		52.67		68.28		Mean		26.33		29.38		32.75		35.78		Mean		20.25		31.32		20.08		34.06		Mean
	1.434		6.262		3.117		8.577		Std. Deviation		3.891		4.353		3.112		5.097		Std. Deviation		2.508		4.491		2.157		3.902		Std. Deviation
	pvalue		<0,0001		<0,0001		<0,0001				pvalue				<0,0001		0.0247				pvalue				0.1027		<0,0001
	Significantly different?		****		****		****				Significantly different?				****		*				Significantly different?				ns		****
	pvalue						<0,0001				pvalue						<0,0001				pvalue						0.5793
	Significantly different?						****				Significantly different?						****				Significantly different?						ns
