# Supplementary material for: Myosin II regulatory light chain phosphorylation and formin availability modulate cytokinesis upon changes in carbohydrate metabolism
Source: eLife journal article supplement (doi:10.7554/elife.83285), 2023-02-24
Supplement: supp [file Figure 2 source data.xlsx]

## Sheet: Figure 2F
	Time (minutes)										µm/min
	Ring assembly and contraction										Ring constriction rate
cell number	WT		pak1(M460G)		pak2Δ		pak1(M460G) pak2Δ			cell number	WT		pak1(M460G) pak2Δ
1	45		45		50		45			1	0.498572		0.387231
2	45		45		50		45			2	0.472155		0.403115
3	45		45		50		50			3	0.482303		0.388596
4	45		45		50		50			4	0.451201		0.372321
5	45		45		50		50			5	0.490258		0.371845
6	45		45		50		50			6	0.50157		0.371823
7	45		45		50		50			7	0.498528		0.382446
8	45		45		50		50			8	0.462255		0.375634
9	45		45		50		50			9	0.493336		0.419623
10	45		50		50		50			10	0.469823		0.39707
11	45		50		50		50			11	0.495552		0.355811
12	45		50		50		50			12	0.462258		0.369588
13	45		50		50		50			13	0.496678		0.393583
14	45		50		50		50			14	0.498236		0.389051
15	45		50		50		50			15	0.493325		0.353577
16	45		50		50		50			16	0.4722		0.364084
17	45		50		50		50			17	0.498002		0.350245
18	45		50		50		50			18	0.493787		0.379498
19	45		50		50		50			19	0.493357		0.373247
20	45		50		50		55			20	0.465579		0.370419
21	45		50		50		55			21	0.498563		0.408431
22	45		50		50		55			22	0.512228		0.3515
23	50		50		50		55			23	0.462584		0.409298
24	50		50		50		55			24	0.49852		0.396878
25	50		50		50		55			25	0.485528		0.360387
26	50		50		50		55			26	0.496663		0.400603
27	50		50		50		55			27	0.463578		0.416133
28	50		50		50		55			28	0.490218		0.387623
29	50		50		50		60			29	0.485425		0.396098
30	50		50		50		60			30	0.498368		0.396404
31	50		50		50		60				0.462842		0.353149
32	50		50		50		60
33	50		50		50		60				0.4853		0.3821		Mean
34	50		50		50		60				0.01588		0.01977		Std. Deviation
35	50		50		50		60				pvalue		<0,0001
36	50		50		50		60				Significant different?		****
37	50		50		50		60
38	50		50		50		60
39	50		50		50		60
40	50		50		50		60
41	50		50		50		60
42	50		50		50		60
43	50		50		50		60
44	50		50		50		60
45	50		50		50		60
46	50		50		50		60
47	50		50		50		60
48	50		55		50		60
49	50		55		50		65
50	50		55		50		65
51	50		55		50		65
52	50		55		50		70
53	50		55		50
54	50		55		50
55	50		55		50
56	55		55		50
57	55		55		50
58	55		55		55
59	55		55		55
60	55		55		55
61	55		55		55
62	55		55		55
63	55		55		55
64	55		55		55
65	55		55		55
66	55		55		55
67	55		55		55
68	55		55		55
69	55				55
70	55				55
71	55				55
72	55				55
73					55
74					55
75					55
76
	49.65		50.88		51.2		55.77		Mean
	3.689		3.226		2.15		5.635		Std. Deviation
	pvalue		0.581		0.222		<0,0001
	Significant different?		ns		ns		****
