# Supplementary material for: Myosin II regulatory light chain phosphorylation and formin availability modulate cytokinesis upon changes in carbohydrate metabolism
Source: eLife journal article supplement (doi:10.7554/elife.83285), 2023-02-24
Supplement: supp [file Figure 2 Supplement source data.xlsx]

## Sheet: Figure 2 Supplement B
	Replicate 1					Replicate 2					Replicate 3
	Rlc1 Intensity	cdc2 intensity	Ratio Rlc1/cdc2	Mean		Rlc1 Intensity	cdc2 intensity	Ratio Rlc1/cdc2	Mean		Rlc1 Intensity	cdc2 intensity	Ratio Rlc1/cdc2	Mean			Mean	Std. Deviation
Glucose	38620	47421	0.814407	1		42170	48932	0.861808	1.0582		48783	51387	0.949326	1.16566			1.075	0.08404
Glycerol	61380	52579	1.16739	1.43342		57830	51068	1.13241	1.39047		62217	48613	1.27984	1.5715			1.465	0.09459

## Sheet: Figure 2 Supplement F
	Septated cells						Multiseptated cells
	WT	pak1(M460G)	pak2Δ	pak1(M460G) pak2Δ			WT	pak1(M460G)	pak2Δ	pak1(M460G) pak2Δ
Replicate 1	25.6098	38.8235	23.8095	53.1646		Replicate 1	0	1.17647	0	8.86076
Replicate 2	26	33.3333	23.0784	39.1753		Replicate 2	0	0	0	8.24742
Replicate 3	20.4546	33.6538	34.8624	43.8849		Replicate 3	0	0	0	10.7914
Mean	24.0214	35.2702	27.2501	45.4082		Mean	0	0.392157	0	9.29985
Std. Deviation	3.09517	3.08141	6.60255	7.11797		Std. Deviation	0	0.679236	0	1.3276
