# Supplementary material for: Myosin II regulatory light chain phosphorylation and formin availability modulate cytokinesis upon changes in carbohydrate metabolism
Source: eLife journal article supplement (doi:10.7554/elife.83285), 2023-02-24
Supplement: supp [file Figure 3 source data.xlsx]

## Sheet: Figure 3A
	Replicate 1					Replicate 2					Replicate 3
	For3 intensity	cdc2 intensity	ratio For3/cdc2	mean		For3 intensity	cdc2 intensity	ratio For3/cdc2	mean		For3 intensity	cdc2 intensity	ratio For3/cdc2	mean		Mean	Std. Deviation
0h	40.847	26.858	1.52085	1		43.236	26.788	1.61401	1.06125		48.89	26.602	1.83783	1.20842		1.08989	0.0459215
4h	29.687	26.525	1.11921	0.73591		21.801	25.83	0.844019	0.554965		20.981	26.555	0.790096	0.519509		0.603461	0.093662
8h	24.106	25.486	0.945853	0.621924		25.732	25.518	1.00839	0.663041		17.55	25.243	0.695242	0.45714		0.580702	0.0411697
12h	23.36	21.131	1.10548	0.726886		19.231	21.864	0.879574	0.578343		12.579	21.6	0.582361	0.382918		0.562716	0.0906099

## Sheet: Figure 3B
	Alexa-fluor phalloidin
	Glucose					Glycerol
cell number	Calbe area (U.R.)	Patch area (U.R.)	Cable to patch ratio (U.R.)	Normalized mean	cell number	Calbe area (U.R.)	Patch area (U.R.)	Cable to patch ratio (U.R.)	Normalized mean
1	9301	23639	0.39346	1.2751	1	8446	53631	0.157484	0.510363
2	7095	17736	0.400034	1.29641	2	14947	69352	0.215524	0.698456
3	11479	32368	0.35464	1.1493	3	12083	67818	0.178168	0.577396
4	7417	26743	0.277344	0.898798	4	8327	50596	0.164578	0.533355
5	12141	34783	0.34905	1.13118	5	9708	50522	0.192154	0.622721
6	11872	33111	0.358552	1.16197	6	13340	54651	0.244094	0.791046
7	4693	14760	0.317954	1.03041	7	10443	47016	0.222116	0.71982
8	6810	28157	0.241858	0.783799	8	8922	42910	0.207924	0.673826
9	12033	34286	0.35096	1.13737	9	7079	36431	0.194313	0.629716
10	8510	28116	0.302675	0.980889	10	12780	54348	0.235151	0.762064
11	10286	34650	0.296854	0.962027	11	7412	41888	0.176948	0.573443
12	14255	40747	0.349842	1.13375	12	12059	50741	0.237658	0.770187
13	11251	42419	0.265235	0.859557	13	6800	37189	0.18285	0.592568
14	9079	30690	0.295829	0.958705	14	13217	58232	0.226971	0.735555
15	8277	29699	0.278696	0.903182	15	9824	58348	0.168369	0.54564
16	9788	18733	0.5225	1.69329	16	7745	50858	0.152287	0.493522
17	7553	16340	0.46224	1.498	17	8622	42259	0.204028	0.6612
18	7854	28957	0.27123	0.878985	18	7888	48303	0.163302	0.529221
19	6650	25037	0.265607	0.860763	19	7744	54827	0.141244	0.457736
20	9294	29905	0.310784	1.00717	20	12989	52980	0.245168	0.794525
21	10503	44731	0.234804	0.760937	21	10868	48111	0.225894	0.732064
22	12028	41349	0.29089	0.942698	22	10128	44527	0.227457	0.73713
23	10486	37902	0.276661	0.896586	23	12623	42979	0.293702	0.95181
24	12374	44583	0.27755	0.899466	24	9626	41860	0.229957	0.745231
25	10711	29828	0.359092	1.16372	25	7261	26800	0.270933	0.878023
26	7551	21525	0.350801	1.13686	26	12608	47971	0.262825	0.851749
27	9077	29445	0.30827	0.999021	27	9196	34219	0.26874	0.870915
28	4602	14476	0.317905	1.03025	28	11018	49473	0.222707	0.721736
29	11343	26597	0.426477	1.3821	29	15039	52776	0.284959	0.923478
30	9786	29098	0.336312	1.0899	30	10670	39143	0.27259	0.883394
31	9593	25466	0.376698	1.22078	31	4868	33596	0.144898	0.469577
32	6134	26205	0.234077	0.758584	32	6975	34200	0.203947	0.66094
33	15374	56678	0.271252	0.879056	33	7039	39989	0.176023	0.570446
34	9579	34691	0.276123	0.894844	34	8102	47284	0.171348	0.555293
35	7552	29582	0.25529	0.827329	35	9489	43889	0.216205	0.700662
36	6005	26299	0.228336	0.739976	36	7589	45535	0.166663	0.540111
37	9618	30276	0.317677	1.02951	37	13758	44502	0.309155	1.00189
38	8503	35117	0.242133	0.784691	38	14759	54116	0.272729	0.883843
39	6565	23672	0.277332	0.89876	39	10829	64277	0.168474	0.54598
40	7388	28511	0.259128	0.839766	40	13694	62338	0.219673	0.711904
41	6731	27886	0.241376	0.782235	41	8415	51491	0.163427	0.529623
42	10561	45646	0.231367	0.749802	42	8949	52382	0.170841	0.553651
43	7885	24263	0.32498	1.05318	43	11039	57612	0.191609	0.620956
44	6386	26463	0.241318	0.782049	44	5940	50649	0.117278	0.380066
45	7777	35195	0.220969	0.716102	45	7898	59837	0.131992	0.427751
46	7222	26008	0.277684	0.899901	46	8335	52301	0.159366	0.516464
47	6713	24926	0.269317	0.872787	47	11546	55228	0.209061	0.677511
48	7058	26191	0.269482	0.87332	48	5489	39747	0.138098	0.447541
49	8044	19881	0.404607	1.31123	49	8465	51156	0.165474	0.536259
50	7033	26117	0.269288	0.872693	50	6832	39993	0.17083	0.553615
51	7843	19384	0.404612	1.31124	51	9543	56850	0.167863	0.543999
		Ratio mean	0.308572
			Mean	1				Mean	0.654823
			Std. Deviation	0.210118				Std. Deviation	0.148562

## Sheet: Figure 3C
		Replicate 1					Replicate 2					Replicate 3
		For3 intensity	cdc2 intensity	ratio For3/cdc2	mean		For3 intensity	cdc2 intensity	ratio For3/cdc2	mean		For3 intensity	cdc2 intensity	ratio For3/cdc2	mean		Mean	Std. Deviation
For3DAD glucose		21.679	21.636	1.00199	1		30.016	28.636	1.04819	1.04611		26.237	26.552	0.988136	0.986177		1.01076	0.0241237
For3DAD glycerol		25.726	24.206	1.06279	1.06069		27.934	26.206	1.06594	1.06382		27.082	26.699	1.01435	1.01233		1.04561	0.00973488
For3DAD rlc1S35A glucose		26.373	24.707	1.06743	1.06531		20.241	19.707	1.0271	1.02506		25.997	25.338	1.02601	1.02397		1.03812	0.0205365
For3DAD rlc1S35A glycerol		26.222	23.451	1.11816	1.11594		21.809	21.451	1.01669	1.01467		26.017	25.884	1.00514	1.00314		1.04459	0.0520295

## Sheet: Figure 3D
	Time (minutes)																				Time (minutes)																				Time (minutes)
	Ring assembly and contraction																				Node condensation and ring maturation																				Ring contriction and dissasembly
cell number	WT			rlc1(S35A)			for3DAD			for3DAD rlc1(S35A)			pak1(M460G) pak2Δ			for3DAD pak1(M460G) pak2Δ				cell number	WT			rlc1(S35A)			for3DAD			for3DAD rlc1(S35A)			pak1(M460G) pak2Δ			for3DAD pak1(M460G) pak2Δ				cell number	WT			rlc1(S35A)			for3DAD
1		45			45			40			50			45			40			1		20			20			15			20			25			20			1		15			20			15
2		45			45			40			50			45			40			2		20			20			15			20			25			20			2		15			20			15
3		45			50			40			50			50			40			3		25			25			15			20			25			20			3		15			25			15
4		45			50			40			50			50			40			4		25			25			15			20			25			20			4		15			25			15
5		45			55			45			50			50			40			5		25			25			15			20			25			20			5		15			25			15
6		45			55			45			50			50			40			6		25			25			15			20			25			20			6		15			25			15
7		45			60			45			50			50			40			7		25			25			15			25			25			20			7		15			25			15
8		45			60			45			50			55			40			8		25			25			20			25			25			20			8		15			25			15
9		45			60			45			50			55			40			9		25			25			20			25			25			20			9		15			25			15
10		45			60			45			50			55			40			10		25			25			20			25			30			25			10		15			25			15
11		45			60			45			50			55			40			11		25			25			20			25			30			25			11		15			30			15
12		45			60			45			55			55			40			12		25			25			20			25			30			25			12		15			30			15
13		45			60			45			55			55			40			13		25			30			20			25			30			25			13		15			30			15
14		45			60			45			55			55			40			14		25			30			20			25			30			25			14		15			30			20
15		45			60			45			55			55			40			15		25			30			20			25			30			25			15		15			30			20
16		45			60			45			55			55			40			16		25			30			20			25			30			25			16		15			30			20
17		45			60			45			55			55			40			17		25			30			20			25			30			25			17		15			30			20
18		45			60			45			55			55			40			18		25			30			20			25			30			25			18		15			30			20
19		45			60			45			55			55			45			19		25			30			20			25			30			25			19		15			30			20
20		45			60			45			55			55			45			20		25			30			20			25			30			25			20		15			30			20
21		45			60			45			55			55			45			21		25			30			20			25			30			25			21		15			30			20
22		45			65			45			55			55			45			22		25			30			20			25			30			25			22		15			30			20
23		45			65			45			55			55			45			23		25			30			20			25			30			25			23		15			30			20
24		45			65			45			55			55			45			24		25			30			20			25			30			25			24		15			35			20
25		45			65			45			55			60			45			25		25			30			20			25			30			25			25		15			35			20
26		45			65			45			55			60			45			26		25			30			20			25			30			25			26		15			35			20
27		45			65			45			55			60			45			27		25			30			20			25			35			25			27		20			35			20
28		45			65			45			55			60			45			28		25			30			20			25			35			25			28		20			35			20
29		45			65			45			55			60			45			29		25			30			20			25			35			25			29		20			35			20
30		50			65			45			55			60			45			30		25			35			20			25			35			25			30		20			35			20
31		50			65			45			55			60			45			31		25			35			20			25			35			25			31		20			35			20
32		50			70			45			55			60			45			32		25			35			20			25			35			25			32		20			35			20
33		50			70			45			55			60			45			33		25			35			20			25			35			25			33		20			35			20
34		50			75			45			55			60			45			34		25			35			20			25			35			25			34		20			40			20
35		50			75			45			55			60			45			35		25			35			20			25			35			25			35		20			40			20
36		50			80			45			55			60			45			36		25			35			20			25			35			25			36		20						20
37		50						45			55			60			45			37		25						20			25			35			25			37		20						20
38		50						45			60			60			45			38		25						20			25			35			25			38		20						20
39		50						45			60			60			45			39		25						20			25			35			25			39		20						20
40		50						45			60			65			45			40		25						20			25			35			25			40		20						20
41		50						45			60			65			45			41		25						20			25			35			25			41		20						20
42		50						45			60			65			45			42		25						20			25			35			25			42		20						25
43		50						45			60			65			45			43		30						20			30			35			25			43		20						25
44		50						45			60			65			45			44		30						20			30			35			25			44		20						25
45		50						45			60			65			45			45		30						20			30			40			25			45		20						25
46		50						45			60			65			45			46		30						20			30			40			25			46		20						25
47		50						45			60						45			47		30						20			30						25			47		25						25
48		50						45			60						45			48		30						20			30						25			48		25						25
49		50						45			60						45			49		30						20			30						25			49		25						25
50		50						45			60						45			50		30						20			30						25			50		25						25
51		50						45			60						45			51		30						25			30						25			51		25						25
52		50						45			60						45			52		30						25			30						30			52		25						25
53		50						45			60						45			53		30						25			30						30			53		25						25
54		50						45			60						45			54		30						25			30						30			54		25						25
55		50						45			60						45			55		30						25			30						30			55		25						25
56		50						45			60						45			56		30						25			30						30			56		25						25
57		50						45			60						45			57		30						25			30						30			57		25						25
58		50						45			65						45			58		30						25			30						30			58		25						25
59		50						45			65						45			59		30						25			30						30			59		25						25
60		50						45			65						45			60		30						25			30						30			60		25						25
61		50						45			65						45			61		30						25			30						30			61		25						25
62		50						45			65						45			62		30						25			30						30			62		25						25
63								45			65						45			63		30						25			30						30			63		25						25
64								45			65						45			64								25			30						30			64								25
65								50									45			65								25									30			65								25
66								50									50			66								25									30			66								25
67								50									50			67								25									30			67								25
68								50									50			68								25									30			68								25
69								50									50			69								25									30			69								25
70								50									50			70								25									30			70								25
71								50									50			71								25									30			71								25
72								50									50			72								25									30			72								25
73																	50			73																	30			73
74																				74																				74
75																				75																				75
76																				76																				76
77																				77																				77
78																				78																				78
79																				79																				79
80																				80																				80
81																				81																				81
82																				82																				82
		49.27		61.67	61.67		45.28	45.28		56.8			57.17			44.39			Mean			26.51			28.86			21.04			26.25			31.41			25.89		Mean			19.29			30.29			21.25
		3.695		7.368	7.368		2.036	2.036		4.487			5.126			2.979			Std. Deviation			2.639			4.038			3.018			3.086			4.172			3.156		Std. Deviation			4.101			4.992			3.729
	pvalue						<0,0001			<0,0001						<0,0001					pvalue						<0,0001			<0,0001						<0,0001					pvalue
	Significant differences?						****			****						****					Significant differences?						****			****						****					Significant differences?
[truncated: 10 more columns]

## Sheet: Figure 3F
	Septated cells
	WT			rlc1(S35A)			for3DAD			for3DAD rlc1(S35A)			pak1(M460G) pak2Δ			for3DAD pak1(M460G) pak2Δ
Replicate 1	19.7917			31.8182			16.1616			28.5714			38.3838			31.7757
Replicate 2	23.1482			16.8142			23.5294			24.2718			41.8605			31.068
Replicae 3	22.3404			25.6881			19.3182			19.4175			35.7143			27.3585
Mean	21.7601			24.7735			19.6697			24.0869			38.6529			30.0674
Std. Deviation	1.75188			7.54371			3.69645			4.57978			3.08191			2.37251
	Multiseptated cells
	WT			rlc1(S35A)			for3DAD			for3DAD rlc1(S35A)			pak1(M460G) pak2Δ			for3DAD pak1(M460G) pak2Δ
Replicate 1	0	0	0	5.45455	5.45455	5.45455	0	0	0	1.02041	1.02041	1.02041	8.08081	8.08081	8.08081	0.934579	0.934579	0.934579
Replicate 2	0	0	0	7.07965	7.07965	7.07965	0	0	0	0.970874	0.970874	0.970874	11.6279	11.6279	11.6279	0	0	0
Replicae 3	2.12766	2.12766	2.12766	9.17431	9.17431	9.17431	0	0	0	0	0	0	8.33333	8.33333	8.33333	1.88679	1.88679	1.88679
Mean	0.70922			7.23617			0			0.663761			9.34735			0.940457
Std. Deviation	1.06383			1.61498			0			0.498282			1.71391			0.817017
