# Supplementary material for: Myosin II regulatory light chain phosphorylation and formin availability modulate cytokinesis upon changes in carbohydrate metabolism
Source: eLife journal article supplement (doi:10.7554/elife.83285), 2023-02-24
Supplement: supp [file Figure 3 supplement 1 source data.xlsx]

## Sheet: Figure 3 supplement A
	Time (minutes)									µm/min
	Ring assembly and contraction									Ring constriction rate
cell number	glucose	glycerol	for3Δ						cell number	glucose	glycerol	for3Δ
1	42.5	45							1	0.500205	0.395532
2	42.5	45							2	0.434847	0.430436
3	42.5	50							3	0.443067	0.439558
4	45	50							4	0.496856	0.440377
5	45	50		glucose		glycerol			5	0.432648	0.359094		glucose		glycerol
6	45	55		51.6		74.51			6	0.391444	0.46278		0.4523		0.4091
7	45	55		6.186		15.12			7	0.50745	0.397374		0.03871		0.03631
8	45	55		pvalue		<0,0001			8	0.500612	0.425875		pvalue		<0,0001
9	47.5	60		Significant differences?		****			9	0.433469	0.394185		Significant differences?		****
10	47.5	60							10	0.412172	0.439597
11	47.5	60							11	0.396294	0.46524
12	47.5	65							12	0.44852	0.388219
13	47.5	65							13	0.402085	0.407893
14	47.5	70							14	0.39775	0.396676
15	50	70							15	0.461296	0.352584
16	50	70							16	0.502048	0.386744
17	50	75							17	0.464594	0.434602
18	50	75							18	0.441393	0.377692
19	50	75							19	0.444807	0.352628
20	50	80							20	0.503285	0.447208
21	52.5	80							21	0.492772	0.38268
22	52.5	80							22	0.430159	0.399817
23	52.5	80							23	0.47045	0.430866
24	55	80							24	0.423305	0.400708
25	55	85							25	0.421632	0.446468
26	55	85							26	0.484569	0.468607
27	57.5	85							27	0.446451	0.458445
28	57.5	85							28	0.390767	0.369392
29	57.5	85							29	0.495087	0.351898
30	57.5	90							30	0.500181	0.370622
31	60	90
32	60	90
33	60	90
34	60	90
35	62.5	90
36	65	90
37		90
38		90
39		90
40		90
41		90

## Sheet: Figure 3 supplement C
	Septated cells					Multiseptated cells
	glucose	glycerol	for3Δ rlc1(S35A)			glucose	glycerol	for3Δ rlc1(S35A)
Replicate 1	28.2828	36.6337			Replicate 1	0	11.8812
Replicate 2	24.5098	36.4486			Replicate 2	0	7.47663
Replicate 3	21.3592	37.6147			Replicate 3	0	12.844
Mean	24.7173	36.899			Mean	0	10.734
Std. Deviation	3.46647	0.626683			Std. Deviation	0	2.86171

## Sheet: Figure 3 supplement D
	Lysed cells
	glucose	glycerol	for3Δ rlc1(S35A)
Replicate 1	2.0202	5.94059
Replicate 2	0.980392	8.41122
Replicate 3	1.94175	4.58716
Mean	1.64745	6.31299
Std. Deviation	0.579017	1.93904
