# Supplementary material for: Myosin II regulatory light chain phosphorylation and formin availability modulate cytokinesis upon changes in carbohydrate metabolism
Source: eLife journal article supplement (doi:10.7554/elife.83285), 2023-02-24
Supplement: supp [file Figure 3 supplement 2 source data.xlsx]

## Sheet: Figure 3 supplement 2 A
	CRIB-GFP intensity (U.R.)
Cell number:	1	2	3	4	5	6	7	8	9	10	11	12	13	14	15	16	17	18	19	20	21	22	23	24	25	26	27	28	29	30
Length (um)	Glucose																																Mean	Std. Deviation
0	32.1726	32.1726	46.1532	11.2793	35.0395	28.1383	19.6095	18.2628	8.4017	16.5535	11.8599	30.8128	11.4194	16.6887	45.3705	25.8648	13.0749	14.5444	46.4026	9.3341	14.2162	11.5819	19.7571	11.4513	20.229	9.4447	11.4806	24.8808	11.5587	18.7724			20.8843	11.3978
0.0909	34.5177	34.5177	47.7291	14.1923	35.7074	33.1874	25.0041	23.9578	9.3501	17.2542	14.6645	36.5744	14.5556	22.9563	46.0523	37.9229	18.4734	20.4812	48.2753	10.7559	19.8589	11.9903	26.4713	14.1098	23.8937	10.8729	13.7963	36.4792	14.143	28.5072			24.8751	11.7127
0.1818	35.9968	35.9968	45.7355	18.8615	36.8101	34.5185	28.9917	30.2668	10.8899	20.28	20.9734	38.8375	19.6625	35.0089	48.2772	49.7178	25.8874	30.5291	48.2019	12.5177	28.894	15.7466	30.7496	20.2493	32.392	12.6068	18.493	47.985	20.1044	37.8561			29.7679	11.5398
0.2727	36.9998	36.9998	45.3763	24.6379	39.2072	36.0527	32.5669	34.504	12.9093	24.2089	31.457	38.34	26.4029	50.8658	48.1404	53.063	34.6831	43.07	45.8803	15.9284	35.1743	20.0924	33.982	29.4155	40.8514	15.6827	24.1804	53.5888	29.6563	45.1618			34.636	10.9865
0.3636	35.4751	35.4751	44.8241	30.6384	39.6288	37.9621	36.3484	34.2636	17.4592	28.5447	44.0527	37.8482	30.9728	60.9971	46.555	51.5257	38.2124	51.9652	45.1004	22.443	39.7576	26.0294	35.1019	36.1672	46.3369	22.6032	32.4224	51.5967	35.9847	47.8471			38.138	9.79773
0.4545	35.3782	35.3782	43.8641	35.0126	40.7792	37.0944	37.7996	35.7443	25.2761	33.9902	52.0042	37.1983	34.1859	65.9953	43.3329	48.6534	39.0767	52.7329	41.2626	34.2845	40.3411	29.4475	35.5712	38.6735	45.9834	34.3803	38.2606	48.4846	38.7195	47.5934			40.2166	7.97694
0.5455	34.6531	34.6531	43.1158	34.0418	41.0229	37.022	39.0203	37.7987	33.4699	36.288	52.8838	37.2127	35.1916	70.1509	41.8025	48.6474	38.8711	50.5023	41.2184	47.4999	39.8392	33.1276	36.7209	38.2704	49.1326	47.7421	41.3121	48.7857	38.502	46.2089			41.8236	7.77286
0.6364	34.7533	34.7533	43.4978	36.2112	41.0016	37.2318	38.8194	38.2792	38.142	36.7561	50.1012	37.408	35.4205	67.9495	40.9022	48.9116	38.1508	48.1353	41.7629	55.0036	41.8022	36.3018	35.857	38.0911	47.6984	55.2527	44.0336	49.0446	37.9566	45.5857			42.4938	7.59788
0.7273	33.7846	33.7846	42.6267	38.1002	42.1722	37.3638	37.8088	37.0086	40.851	38.8829	48.072	37.2342	36.5199	60.7519	38.3634	45.017	37.9185	49.1953	39.9652	58.5624	41.8513	38.2825	34.7742	37.2637	45.6411	58.5302	45.6823	44.5288	37.0992	42.9736			42.0203	7.08565
0.8182	34.1392	34.1392	42.7422	37.9282	42.3388	37.2367	37.3818	35.9365	39.7661	38.0201	49.2658	36.1411	35.7444	57.1821	36.5236	43.3122	36.3003	47.5789	40.7108	58.4576	42.5359	38.8562	34.9733	37.2115	43.118	58.414	45.9209	43.65	37.3423	41.0363			41.4635	6.82858
0.9091	33.2048	33.2048	41.8501	37.2336	42.228	37.574	36.2927	36.8803	41.3273	38.133	47.0341	36.1628	34.6839	51.8456	37.4194	41.3391	37.6225	44.3986	39.7471	55.4604	41.0706	38.6297	34.6386	37.1304	41.8164	55.4601	46.8191	41.7172	37.5603	41.9447			40.681	5.80104
1	33.6335	33.6335	41.1503	36.0039	42.1851	37.307	36.4136	36.8627	42.083	37.769	44.0053	35.0276	35.1756	46.166	37.3309	40.7406	37.3288	42.777	40.1696	52.2076	40.9804	37.1206	34.3069	37.1975	40.6324	51.5022	47.5299	40.9088	37.7539	41.8275			39.9244	4.78502
1.0909	33.0481	33.0481	41.5599	37.1649	42.1787	37.9719	35.2217	38.6003	42.1996	38.7207	42.4209	34.6674	34.5477	42.7745	36.5339	39.6275	36.2778	40.7033	38.9457	48.5232	40.1548	37.9966	35.3681	36.6464	38.0702	48.1386	44.8462	39.7364	35.7209	39.8278			39.0414	3.89634
1.1818	32.1271	32.1271	41.3381	37.2342	41.6719	38.8079	35.3646	38.4704	41.9609	37.4928	40.8869	35.3334	34.5048	41.5779	34.9248	37.5985	35.6857	40.255	40.3977	46.5705	40.3117	36.1033	35.3886	35.9757	36.9024	46.4444	43.7393	37.4957	36.3875	40.5143			38.4531	3.64839
1.2727	32.6209	32.6209	41.1247	38.5681	39.7493	38.4472	35.9367	38.1738	40.5775	38.4585	40.1784	34.2732	35.361	40.0055	33.3832	36.4641	34.7497	38.8307	40.5146	43.5498	40.2949	36.5115	34.3699	35.0464	38.6785	43.367	43.429	35.7327	35.1638	39.712			37.8631	3.14975
1.3636	32.8658	32.8658	41.1425	38.864	39.81	36.5518	35.4936	38.127	40.8753	38.4491	38.831	33.9504	35.2521	38.2113	30.772	33.8683	34.9612	37.1423	38.987	39.6544	38.9006	35.1447	34.9891	34.7457	37.4691	40.0224	42.4772	34.3124	34.8665	39.0309			36.9544	2.85202
1.4545	32.8179	32.8179	41.1361	38.7036	38.2939	36.4342	35.385	37.1711	39.9447	38.6976	36.8807	33.5254	34.2515	38.8505	30.1139	33.6684	35.1042	35.4104	38.6853	37.1882	39.716	35.4012	35.5974	35.0263	36.8403	37.1233	40.6455	33.8023	35.5189	40.0612			36.4938	2.65864
1.5455	32.3117	32.3117	39.1857	38.3877	37.3528	36.9143	34.5785	37.4761	40.7432	39.1253	35.2013	32.6651	35.0934	36.729	30.1353	33.2788	34.9274	33.4641	37.2055	34.5108	40.2803	35.3815	35.0961	34.6304	35.1786	34.0916	39.9162	32.9527	34.3136	39.9878			35.7809	2.72912
1.6364	32.7983	32.7983	38.6167	37.567	37.1425	37.0756	33.9887	37.9163	39.4532	38.6433	33.6272	33.2358	35.6281	35.9872	29.0702	32.7076	34.533	33.4974	37.265	33.6459	38.9038	35.7813	34.735	33.9807	33.1385	34.0625	39.1677	32.6651	33.7868	39.5303			35.365	2.62116
1.7273	31.5984	31.5984	37.3029	38.2006	38.3644	37.0455	34.877	36.5385	39.6799	38.2972	33.5267	32.2225	34.8884	35.5748	28.8054	31.275	33.5587	32.7955	36.6662	31.8452	36.8379	35.3034	34.5708	33.7147	30.9768	31.4586	38.2866	31.8661	33.5008	38.6868			34.6621	2.86815
1.8182	30.5635	30.5635	37.9024	38.0946	38.4258	35.9701	33.3821	36.4188	40.7504	37.5853	32.8101	31.8534	34.7044	36.2236	29.1486	31.8027	32.2923	32.2887	35.9615	30.0132	37.2304	34.3549	34.3378	32.756	30.8075	30.3481	37.8714	31.0971	32.6875	37.3958			34.188	3.11012
1.9091	29.9321	29.9321	36.805	37.2375	37.9999	35.8577	33.8042	35.9115	39.5319	37.1437	32.0134	32.3906	34.2777	35.7779	28.1682	31.6694	32.2749	31.0153	36.4159	30.3323	35.954	34.1888	34.6236	32.7819	30.2315	30.1728	38.2916	31.4607	33.6838	37.3305			33.907	3.02766
2	30.2815	30.2815	36.224	36.3844	37.8672	35.5071	32.2675	36.6273	37.3956	38.6824	31.1767	32.6133	34.2982	35.5083	28.4791	31.2346	31.8167	31.9304	36.4523	29.198	36.1373	34.6099	35.0286	32.4154	29.6049	29.5156	38.0284	31.3018	32.2736	36.2455			33.6462	3.012
2.0909	29.5462	29.5462	35.5787	36.5731	38.1925	35.8158	31.8074	35.9053	37.4494	37.6302	31.8196	32.6637	34.3025	35.9348	29.0125	30.1395	32.9489	31.2623	35.4762	29.1757	35.086	33.7911	34.9399	31.8862	29.4305	29.0527	37.3622	29.302	31.957	36.285			33.3291	3.04325
2.1818	29.0249	29.0249	35.2271	36.918	36.6261	35.0854	31.7522	36.0912	36.252	37.6296	31.2502	32.6297	34.7831	34.1384	27.8573	29.6503	32.6117	30.78	35.4123	27.9662	33.2088	33.8155	34.2816	32.4196	29.548	28.0944	37.3412	29.9348	32.2138	36.4438			32.9337	3.07026
2.2727	28.5708	28.5708	33.9162	36.3335	36.4176	33.1251	31.1532	36.1039	36.6456	37.4597	30.6531	31.5234	35.02	35.0547	28.8213	29.8839	32.3373	29.9632	35.7246	28.6585	31.3322	31.9674	34.6891	32.4807	28.5979	28.3984	37.0237	29.622	32.9309	36.1291			32.6369	3.04659
2.3636	28.5587	28.5587	33.8957	36.719	35.2035	34.4568	30.1203	35.254	35.3829	36.7312	29.8065	31.7186	33.8716	34.3543	29.1147	28.8414	33.2673	29.5477	36.1102	28.0537	32.4768	31.9101	35.1853	32.655	29.3605	28.0999	36.4644	28.3577	32.6911	35.3093			32.4026	2.98776
2.4545	27.658	27.658	31.9621	36.1851	35.9507	32.8413	30.8708	35.7683	33.8711	36.658	29.65	32.6215	33.9846	34.8091	28.7405	28.9769	32.6922	29.933	37.6125	28.3849	31.6746	31.9462	33.9295	32.7606	29.5225	28.6771	36.4749	28.7538	32.4522	35.1541			32.2725	2.98913
2.5455	27.3872	27.3872	32.6262	36.1451	35.2397	31.903	30.0156	34.9469	31.9762	36.4197	29.7327	33.5713	34.7272	35.1974	28.2981	29.2591	32.2521	28.7811	37.0522	28.2613	31.3988	31.321	33.1001	31.5593	28.4164	28.2898	36.5279	28.6274	31.6093	35.6915			31.924	3.07113
2.6364	25.7546	25.7546	32.5193	36.1006	34.9759	30.1071	30.2097	34.0524	32.3609	35.3342	28.4873	33.4144	33.844	35.357	28.7504	28.787	32.5782	29.1192	37.6931	28.2759	31.6301	30.1518	33.3253	31.6594	29.6135	27.9695	37.1842	28.8357	31.9177	35.5267			31.7097	3.24396
2.7273	26.3897	26.3897	32.6255	35.3056	33.9196	30.204	30.3817	33.7652	32.4009	34.439	28.9163	32.7681	32.8265	34.5972	27.4374	28.6471	33.7601	28.8532	36.7503	27.6996	30.4984	31.1498	33.2697	32.4789	29.4224	27.9793	36.7335	28.1589	32.8879	36.3419			31.5666	3.08201
2.8182	26.2253	26.2253	33.2403	34.6524	32.7852	30.8267	30.0968	33.0847	31.8198	33.8144	28.8172	34.0241	33.0437	34.2098	27.2007	27.9273	33.9342	29.0312	36.242	27.9191	30.9471	29.5853	32.6852	33.569	28.874	27.7889	37.3995	27.7583	33.5739	36.8348			31.4712	3.18614
2.9091	26.4567	26.4567	32.5983	34.2463	31.2837	30.7032	29.7735	32.3532	31.9344	32.8574	28.9158	33.3178	32.5319	33.2871	28.2861	29.0444	33.5002	28.5379	36.567	26.0073	30.6254	30.448	32.6656	33.402	29.1725	26.0197	37.7816	28.4767	33.5774	36.6149			31.2481	3.13342
3	26.849	26.849	32.488	33.3109	30.7452	29.1466	30.4429	32.5447	30.9826	31.9464	28.1315	33.1033	32.0806	32.7659	27.7702	29.3329	32.5276	28.0365	36.8513	26.6924	31.5681	30.2122	33.199	32.6063	29.0512	26.8601	39.0067	29.2364	32.9749	37.0901			31.1468	3.10741
3.0909	26.1521	26.1521	32.7518	33.2475	29.6943	29.5169	29.3114	30.7878	31.4094	30.8435	27.9936	32.8139	32.5602	33.3852	28.1969	28.7861	33.7983	29.1736	36.6719	27.5273	31.9916	30.1673	31.9795	33.4677	27.7201	27.3954	38.2844	28.727	34.488	35.3651			31.012	3.0662
3.1818	26.1829	26.1829	32.1402	32.3571	29.7507	28.9666	30.4012	31.7275	31.1682	31.0193	29.2863	33.6192	33.1647	33.5762	28.7442	28.4005	33.4818	29.428	35.8282	27.5257	29.7285	29.6972	30.7094	33.3477	27.958	27.5552	38.451	27.8467	33.7149	35.8675			30.9276	2.99159
3.2727	26.1335	26.1335	31.4706	31.6355	30.4531	28.2361	29.9654	31.4733	31.2436	30.787	29.2858	31.9342	31.9765	33.5472	27.1465	28.4644	32.7933	28.6917	35.7336	27.0082	30.4546	30.2016	29.8199	33.0985	28.7804	26.9476	37.4579	28.1174	33.0633	35.9282			30.5994	2.86819
3.3636	25.649	25.649	31.8896	31.9742	30.2905	28.6039	29.813	31.2555	32.725	31.0864	28.2586	30.2558	30.539	34.6259	27.1251	28.656	32.5688	28.3736	36.3886	27.4417	29.5215	29.5098	28.9355	32.4957	28.3938	27.698	37.6241	28.2849	33.3322	37.0102			30.5325	3.09372
3.4545	25.821	25.821	30.8486	31.8352	29.9582	28.1512	30.4857	30.8439	30.3259	29.5078	28.3043	30.684	29.7937	34.1306	27.5161	28.7158	32.4589	28.7312	35.875	27.7069	30.0584	30.3234	29.3216	33.499	28.7632	27.3582	38.8122	29.0901	33.7338	35.7042			30.4726	2.98854
3.5455	25.7103	25.7103	31.4096	31.7956	29.1775	28.4965	33.1461	31.5873	30.3025	29.255	28.4524	29.5203	28.6823	32.5496	27.9754	28.5174	30.4771	28.5349	34.5571	26.4382	31.5631	29.6308	29.4952	31.7427	29.0247	26.5627	39.2333	28.0107	32.1384	35.1238			30.1607	2.92965
3.6364	24.9681	24.9681	32.4175	31.2029	30.2752	27.8287	32.2356	32.3933	29.9975	28.6352	28.4954	30.5142	29.2655	32.1	27.9511	29.1943	30.3032	28.6277	33.0784	27.4856	33.3778	29.4793	28.1548	30.0205	27.4667	27.5368	40.376	28.6025	30.6488	35.8625			30.1154	3.0905
3.7273	25.1739	25.1739	32.3671	32.2476	31.6569	27.3248	32.5517	32.6151	30.2885	28.5654	28.367	29.1438	29.5426	31.1498	27.5788	28.5028	30.1734	29.0925	33.5227	27.7366	33.2643	30.7315	28.1347	30.7153	27.5732	27.2404	39.6138	28.394	30.5334	35.158			30.1378	3.01755
3.8182	26.1862	26.1862	30.7586	33.0544	31.0654	28.8595	33.2874	32.59	31.8914	29.0186	28.8581	29.7327	28.3165	31.4359	29.0408	27.6497	29.3355	29.1219	32.3152	26.7296	32.4238	33.0165	27.9892	29.4628	28.212	26.7084	39.7989	27.7134	29.6973	34.874			30.1777	2.9417
3.9091	26.1255	26.1255	32.1562	32.4788	31.3183	30.2468	32.1264	35.3653	33.6075	28.1127	28.902	28.795	27.7286	30.675	29.2456	27.9849	29.4899	28.2845	33.7326	27.4569	32.5082	32.2557	27.791	30.2781	28.3838	27.3068	40.7804	28.3541	30.7058	32.301			30.3541	3.08592
4	25.1132	25.1132	31.9578	33.8359	31.8857	33.2115	31.8971	34.8937	33.346	28.3167	27.8815	28.6594	28.1297	31.774	29.0431	27.8926	28.7856	27.6396	33.4772	27.4877	31.514	32.8972	28.4922	29.213	28.164	27.4545	40.5639	27.1649	29.2696	32.8435			30.2639	3.2962
4.0909	26.0849	26.0849	32.5751	35.8222	32.3147	34.5133	31.9418	35.4708	33.0202	27.6007	27.6914	29.6419	27.6649	31.5256	29.0003	27.7222	28.9802	27.9245	33.2511	27.3647	31.6034	33.2027	29.3993	29.5993	28.0113	26.7727	40.0782	27.5537	29.5878	32.4517			30.4818	3.33358
4.1818	25.9901	25.9901	32.2883	35.0967	34.0955	36.5795	32.5746	36.4867	32.7288	29.176	27.5726	30.1582	28.426	31.6738	28.4247	27.7441	29.0881	28.0415	33.0445	27.2331	31.2151	32.2763	27.893	28.8372	29.7731	27.4001	40.4395	27.8979	28.6308	32.5983			30.6458	3.47107
4.2727	26.171	26.171	33.7514	35.981	33.7083	38.9031	32.0321	37.5103	32.034	30.4057	27.4769	30.2275	29.4888	31.7772	28.4776	28.9505	29.1769	27.516	33.3775	27.5078	31.1498	32.1431	29.4092	28.7521	29.5126	27.5974	39.1511	28.2049	28.6429	33.6627			30.9623	3.53804
4.3636	26.3036	26.3036	35.6796	37.0732	35.4849	42.0116	31.8841	37.6381	32.2931	33.059	27.4951	30.8557	27.865	32.5915	27.9854	28.6882	29.6085	27.9261	32.3592	27.659	31.578	31.9987	30.474	29.8069	29.4189	27.4848	38.8422	28.3756	29.5062	32.3754			31.3542	3.91791
4.4545	26.9601	26.9601	35.9428	38.0177	37.2374	42.2518	32.107	38.8933	31.6828	34.4989	27.8272	32.1064	28.8731	32.6759	27.987	28.6105	29.667	29.1251	32.641	27.8966	31.4973	32.4542	29.4745	30.0748	29.3345	27.0682	39.8779	28.7441	30.3483	32.9228			31.7919	4.11928
4.5455	28.3895	28.3895	36.8377	37.9606	37.1351	43.9856	32.2181	39.8564	31.5907	36.3159	28.9403	32.4387	30.4836	33.4346	28.4613	30.5749	31.2706	28.9017	32.6344	27.5687	31.61	32.1541	29.4525	30.2543	28.3202	27.5745	38.9035	29.3548	30.1263	33.4095			32.2849	4.13056
4.6364	28.8944	28.8944	36.9529	39.6381	38.274	44.0228	32.4227	39.9193	31.9972	39.7969	28.4333	33.0029	29.468	34.3068	28.082	31.0832	31.4266	28.8104	33.0152	28.1192	33.7996	31.8025	29.9373	31.2002	29.0887	27.7353	39.3135	30.8637	30.6431	32.5554			32.7833	4.36031
4.7273	29.0867	29.0867	38.6504	40.5965	38.0038	44.5764	31.6827	40.3045	32.123	41.9194	28.5261	34.8688	29.3751	37.7183	29.5137	30.6163	32.024	31.0349	33.3512	27.7628	36.3122	32.0796	30.115	31.9851	28.3489	27.7827	41.8748	30.3678	32.2925	32.5388			33.484	4.81822
4.8182	29.7388	29.7388	38.3237	40.1418	39.7764	46.3514	32.5303	40.9426	31.7415	41.6711	31.0206	34.6383	29.9544	38.9817	29.4348	31.384	32.9584	30.9322	33.5392	29.715	35.464	32.069	30.1594	32.6135	28.7936	29.548	42.5171	31.2278	32.3016	32.449			34.0219	4.75307
4.9091	30.6335	30.6335	38.8207	41.1541	40.6189	45.701	32.1711	40.8877	34.0677	43.7804	30.4634	35.2119	30.0694	40.2487	30.1339	32.4079	33.7817	30.6959	34.4311	30.9933	36.3761	31.9046	30.7044	33.1244	28.6987	31.0062	44.4361	31.4835	33.1248	32.2533			34.6673	4.89488
5	30.8278	30.8278	39.1613	41.0106	41.5246	44.9244	31.4584	43.0643	36.4879	43.339	30.55	36.9292	30.5135	40.7043	28.3929	33.064	34.4789	31.8042	36.0377	31.1825	37.105	32.2209	30.9925	35.084	28.8432	31.1751	45.6872	32.3951	34.6439	33.1414			35.2524	5.02343
5.0909	30.8545	30.8545	40.1163	42.1499	40.7471	44.7908	32.3399	42.9517	35.8149	44.8098	31.5437	38.6337	30.6355	42.1187	28.3259	33.2696	35.3706	32.8262	37.4411	32.271	38.1211	31.9249	32.0915	34.5698	29.9194	32.2642	48.7999	33.1005	34.5867	33.037			35.876	5.26742
5.1818	31.3157	31.3157	41.1894	43.1519	42.8582	44.7692	31.4064	43.5028	36.749	45.8603	32.3593	39.3882	31.1135	43.8939	29.8022	34.2293	36.1185	33.1554	37.4017	33.2456	40.4914	32.4394	32.3365	35.6468	29.8279	32.8534	52.446	33.6558	34.9922	33.9161			36.7144	5.72838
5.2727	31.8234	31.8234	41.178	43.5416	43.7872	44.2726	29.5898	42.669	37.589	45.5492	33.0347	40.3349	32.0607	43.2857	29.8848	34.99	37.7746	33.4107	38.3158	33.0444	39.5666	31.6275	32.2925	37.058	30.4733	32.8206	53.5608	34.8635	36.8788	34.848			37.065	5.72528
5.3636	32.5862	32.5862	41.1059	43.4886	43.5949	44.1564	30.3309	42.4478	38.3517	44.3619	33.1382	39.9456	32.5434	43.5018	30.7734	35.3685	38.6887	34.4733	38.1441	33.5998	39.7596	32.1194	33.5814	38.5592	28.213	33.2394	54.0791	35.1024	38.8706	36.547			37.4419	5.57742
5.4545	32.9198	32.9198	40.2751	43.1176	43.9275	42.9098	28.3678	41.9341	41.1198	44.6636	34.298	40.0099	32.1485	43.6844	30.3279	36.0096	39.8707	34.9107	38.5604	35.4265	40.8687	31.2351	34.9635	39.7328	29.4066	35.6993	54.0293	35.5252	39.0842	37.4834			37.8477	5.51138
5.5455	33.0416	33.0416	40.551	42.2192	43.7736	42.3829	27.8005	41.9062	40.0436	44.6049	34.6817	42.0838	34.0827	44.9091	30.8648	37.4507	40.3907	35.5157	39.395	35.2997	40.5168	29.7878	34.7423	40.3607	30.0398	34.7325	55.1569	36.5521	39.9214	37.5305			38.1127	5.63306
5.6364	31.5687	31.5687	41.2957	42.3341	43.0747	42.0587	27.4459	41.7755	40.2727	43.5681	35.2736	41.9913	35.1761	44.0902	31.7501	36.8572	40.2509	36.3612	39.3955	35.43	40.4761	30.4879	33.994	40.0478	30.9856	34.72	55.3818	37.1865	39.8007	37.9555			38.0858	5.54009
5.7273	32.3013	32.3013	39.9462	42.4548	43.2706	42.6993	26.8505	38.7328	41.3267	42.7848	36.1838	42.854	34.9908	43.6917	32.4338	36.5874	40.9418	37.6288	39.4357	35.289	40.6691	28.1324	33.0743	40.1775	30.964	35.0539	55.312	36.8849	40.1344	38.3468			38.0485	5.61397
5.8182	32.948	32.948	39.9067	41.0818	42.5422	41.6283	26.5455	37.6032	40.9282	42.1436	37.3309	42.166	33.9318	43.7616	32.9544	36.6408	42.1172	36.786	39.1958	36.4626	40.8781	27.8609	33.9503	42.2523	30.6504	36.4073	54.1721	36.0624	42.098	39.2812			38.1079	5.43822
5.9091	31.8646	31.8646	40.1506	38.8399	39.8024	40.8991	25.647	35.7165	40.4233	41.103	36.2126	41.1486	33.7896	42.6799	33.714	36.826	42.1437	36.5236	39.8523	35.5837	41.4172	27.3645	32.9603	42.0101	31.464	34.8104	54.1354	36.2895	41.7833	39.5171			37.5512	5.44471
6	32.0133	32.0133	39.2487	37.0738	40.9363	40.8583	25.7141	34.2492	41.1103	41.5416	36.2134	42.1507	33.9024	42.7646	33.4978	36.1548	42.4475	36.9432	40.4835	34.1082	40.2695	26.626	32.5624	43.1205	32.4462	33.8973	52.497	36.2822	42.6278	38.9169			37.4224	5.46859
6.0909	32.0993	32.0993	37.6984	35.5062	39.1078	39.1406	26.1146	31.2579	41.0631	41.2056	36.248	41.7896	33.3584	42.5607	33.0244	37.1787	41.751	36.8868	39.8438	34.4731	39.6794	26.6232	32.0514	41.7676	32.8165	33.286	52.1289	37.2482	41.5001	39.0541			36.9521	5.29391
6.1818	31.6406	31.6406	36.5005	33.8913	36.2987	37.8511	25.6548	31.4472	41.907	40.0189	36.3319	40.4083	32.8714	42.7467	31.6286	36.4366	42.4559	36.24	39.5434	31.7222	38.7939	25.6729	32.1269	41.5426	33.6606	31.3511	50.8998	36.2589	41.3499	40.085			36.2992	5.39384
6.2727	30.1612	30.1612	35.8636	31.4941	34.3255	37.5543	25.3604	31.0141	40.4309	39.6469	35.9409	38.9006	32.098	41.757	30.9407	35.6408	41.2775	37	39.6583	31.6859	38.217	25.72	30.5319	42.1262	34.209	31.4422	48.631	35.4021	41.7601	40.4184			35.6457	5.31398
6.3636	29.6297	29.6297	36.3538	32.2595	32.2393	37.3949	25.2446	30.6252	39.9338	39.557	36.7095	38.9347	32.3705	40.5028	31.3787	36.2951	40.4223	36.4086	40.1854	32.2313	38.287	25.8414	29.8441	41.5296	33.7966	31.489	46.6938	36.2058	41.6202	40.5886			35.4734	5.12041
6.4545	29.0677	29.0677	35.006	31.2423	32.749	37.9384	24.8696	30.2783	39.1572	38.0531	35.5942	37.1183	30.3248	38.998	31.1098	34.9324	39.627	35.9459	39.1979	31.3078	38.111	25.8433	29.4725	40.1564	33.0731	31.563	44.6766	35.8007	39.6341	39.2255			34.6381	4.75966
6.5455	29.2678	29.2678	32.5003	31.055	32.6414	37.1941	25.0123	30.0323	38.6098	36.8004	35.6513	35.1752	30.3261	37.3962	29.4332	33.7012	38.7198	35.9357	38.8594	31.9231	36.4565	25.3864	29.8585	38.8567	32.0146	31.7503	43.559	33.4905	38.4585	39.8924			33.9742	4.44736
6.6364	28.4545	28.4545	31.3254	30.1662	30.6965	35.2081	24.9707	31.1752	38.4446	37.2196	35.4612	33.1546	29.3568	37.6572	30.0895	32.4847	37.7769	35.0174	38.5371	32.2187	36.3342	25.3675	29.8947	38.8974	31.3011	31.9025	42.6501	33.2688	38.6949	40.1189			33.5433	4.43677
6.7273	27.1169	27.1169	31.8882	30.8528	29.4275	35.6938	23.6861	32.0291	38.378	36.0372	34.2795	31.5238	29.7588	34.4929	29.3023	31.3099	35.1458	33.371	38.5033	31.34	35.7631	25.0761	28.6181	36.81	31.8251	30.7902	42.3281	31.4498	36.2089	40.1131			32.6745	4.35227
6.8182	25.8008	25.8008	31.2195	31.7449	29.2954	34.6448	24.4913	32.2122	36.5215	37.141	32.5191	30.6152	30.1897	33.3133	30.2891	30.1051	33.4122	32.6103	36.0348	30.9104	34.867	24.9123	28.5541	34.5175	30.9777	30.8508	42.2574	30.1957	34.7076	38.7922			31.9835	4.02425
6.9091	26.4621	26.4621	31.1568	32.446	29.2004	34.3659	24.81	32.7272	36.5243	36.0988	32.0544	29.2437	28.7936	33.2686	30.4332	30.4332	32.1425	31.2374	35.2888	31.1128	32.5954	24.7725	29.2226	33.0984	29.9222	30.9237	41.6276	30.537	32.3627	38.6888			31.6004	3.73096
7	25.7589	25.7589	31.2702	33.1211	28.4949	35.0881	25.4966	33.5929	35.8586	35.7382	30.3409	28.8399	28.6724	33.0198	30.1026	30.0101	30.2097	30.0064	34.3205	30.7094	32.6847	23.7415	27.6106	31.206	30.306	30.2846	42.9881	30.3151	31.1425	38.8449			31.1845	4.01482
7.0909	25.9041	25.9041	31.8994	34.0963	28.5301	35.1183	25.6902	32.6755	34.9798	34.2394	29.6095	28.6674	29.0372	33.2507	30.9391	30.3204	29.5296	30.4208	33.2067	29.2579	31.8741	24.2777	28.8236	30.4406	29.6039	28.6679	42.0888	29.8433	29.9112	38.3466			30.9051	3.7484
7.1818	25.9147	25.9147	32.135	33.9191	30.7966	35.0143	24.5685	32.8001	32.7261	33.1932	30.0788	28.1724	27.6926	31.6716	32.1238	29.2611	28.5262	30.343	33.1642	28.7288	32.2305	25.2071	27.901	29.1727	30.7079	28.8624	40.3905	29.7237	28.7872	35.1009			30.4943	3.3606
7.2727	26.3637	26.3637	32.2063	33.2524	30.9576	34.317	24.9297	32.7038	32.6401	33.0585	29.5048	27.1921	28.8771	32.7981	32.4126	28.1308	29.3866	30.3437	32.941	28.7527	31.1806	25.1257	27.9819	28.6784	30.7352	28.6851	39.0742	28.4326	28.6898	34.4757			30.3397	3.13131
7.3636	26.2368	26.2368	33.5511	33.4618	31.4668	32.3161	25.9416	32.2562	32.1657	34.0662	29.5003	27.0477	27.8316	33.5665	31.0083	27.7663	28.2443	29.0178	32.7358	28.1428	31.3296	25.3744	29.23	29.0472	30.51	28.643	38.2187	28.0643	28.471	34.1531			30.1867	3.03539
7.4546	26.3388	26.3388	32.7419	32.8079	31.3934	33.9937	27.0287	32.7514	32.5317	33.3363	28.069	28.1235	28.2858	33.9182	31.6027	29.202	27.0614	28.1579	32.0034	28.9822	32.5392	24.5094	28.7478	27.8118	31.2675	28.8035	37.7601	28.1432	27.5762	33.9201			30.1916	3.04938
7.5455	27.299	27.299	33.2174	32.7166	31.3476	35.3076	27.2031	31.8906	31.3195	34.4244	27.6796	28.4487	29.3706	33.1199	31.0402	28.9424	27.413	27.958	31.9841	28.9853	31.9335	24.9235	29.2567	27.0922	32.8576	28.5816	36.4883	29.5493	27.0079	32.7138			30.2457	2.85557
7.6364	26.6298	26.6298	30.3997	32.2747	30.6405	35.687	26.886	33.4996	31.6274	33.5758	27.7244	29.17	28.9333	33.2178	30.1525	28.3582	28.4922	29.5676	33.3079	27.8228	30.5791	25.8786	28.8172	27.2566	32.1349	27.8529	36.1366	28.5591	26.6458	33.2823			30.058	2.8374
7.7273	27.3755	27.3755	29.5549	33.0228	30.6014	35.9477	27.1116	33.9271	32.7535	31.6805	29.0973	27.8191	29.0389	33.2457	29.7475	28.4002	27.954	28.4779	34.3665	27.7516	31.5595	26.7771	29.7996	28.5067	31.0471	27.315	35.7193	28.2236	28.2596	32.7598			30.1739	2.70565
7.8182	25.1632	25.1632	30.3607	33.3801	31.7834	35.7919	26.5381	36.0119	32.0798	32.7307	28.0542	27.5011	29.0271	32.018	30.1191	27.6366	28.617	28.7467	34.3022	28.4552	31.5826	26.9365	28.6868	28.4041	31.8046	28.9258	36.3629	27.7717	28.5781	31.8851			30.1473	3.05669
7.9091	24.6987	24.6987	29.667	35.1794	31.783	36.3604	27.5438	35.826	30.4682	33.8147	28.3725	27.1002	29.4718	32.9748	29.7029	28.7135	28.5681	28.3723	35.11	28.8858	31.6402	26.612	29.1621	29.1843	30.9454	28.9605	36.3855	28.2143	28.5955	32.426			30.3146	3.22635
8	24.9829	24.9829	31.332	35.9526	31.898	36.1727	28.3813	35.8385	31.7738	34.0669	27.6149	27.1858	28.4642	32.0321	30.2639	28.6882	27.0623	27.8428	36.6036	29.1113	32.713	27.1604	28.6724	27.5817	29.8972	29.9621	37.1629	28.6107	27.4189	33.8375			30.4422	3.50872
8.0909	24.5533	24.5533	31.931	35.5227	32.7588	36.6333	28.7135	36.1719	31.4005	33.9945	27.4117	26.9455	29.5654	33.071	31.0041	29.5191	27.3891	28.9276	36.5004	29.8508	32.0892	26.6103	27.8647	27.4484	30.1678	29.7499	38.9066	29.2109	27.0354	33.8386			30.6446	3.70458
8.1818	25.6276	25.6276	30.6215	35.5462	33.2564	37.0265	28.5065	35.4916	31.8753	33.959	28.4031	27.0121	28.4325	32.1898	31.0159	29.4785	27.5282	28.8702	35.3604	29.2098	32.5241	27.2965	29.8824	27.1818	30.354	29.7751	39.9664	29.3477	26.8805	35.232			30.7826	3.61038
8.2727	26.3995	26.3995	30.8973	35.4959	34.0101	36.2554	29.785	35.4211	32.8233	35.1008	28.4977	27.1877	28.2489	32.2627	30.774	29.5539	27.0834	29.6233	34.9794	29.4328	32.5489	28.7386	29.6429	27.2547	29.6566	29.5208	40.4373	29.5972	26.7152	35.232			30.9859	3.53647
8.3636	25.2188	25.2188	30.7635	35.3518	33.9871	36.3802	30.3187	36.191	32.2087	34.6555	29.2662	27.8018	29.8147	33.1901	33.1204	29.1703	27.2374	29.4783	33.1855	28.3433	33.1955	28.1623	29.6922	26.9899	30.2975	29.098	40.8942	29.0079	26.9631	36.4357			31.0546	3.73207
8.4546	25.374	25.374	30.8588	35.744	35.08	37.5501	29.5413	37.0278	32.828	34.9784	29.0138	27.982	29.6173	33.1345	33.6547	29.2158	27.3626	29.664	32.566	28.1134	31.927	28.4569	30.06	27.062	31.092	28.4185	40.5745	29.6157	26.7509	37.1034			31.1914	3.88076
8.5455	25.5897	25.5897	31.9146	36.3057	35.7262	37.9489	30.3008	36.9762	32.9733	35.2177	29.0473	27.2563	29.9686	32.0185	33.7978	30.2817	28.8195	29.1142	31.2405	28.4818	32.7986	29.2039	29.878	27.46	30.6758	28.9073	42.5297	29.6168	27.2116	36.1513			31.4334	3.95605
8.6364	25.3447	25.3447	31.1655	36.8254	36.0063	38.9066	30.8502	37.6526	33.3192	34.7747	28.8427	27.69	30.0051	33.3038	34.3183	30.449	27.8357	29.4372	30.7079	28.866	32.0975	30.2261	30.7922	28.2176	31.0574	28.0499	42.1546	30.4751	27.3928	34.7084			31.5606	3.98298
8.7273	26.113	26.113	32.5871	36.8438	36.5149	38.7406	30.5623	38.3302	32.1434	34.6011	29.0325	27.4206	30.1898	33.8212	32.852	31.0855	26.897	30.3127	32.6094	27.9439	32.7405	29.432	31.3688	27.864	33.0086	27.679	41.3883	30.8894	27.7334	33.8475			31.6888	3.91254
8.8182	26.3185	26.3185	31.3129	37.9849	37.1032	39.1947	30.4802	37.4791	33.0074	35.5199	29.8675	28.5201	31.3481	33.6289	32.6536	31.265	27.263	30.459	32.6981	27.6394	33.6569	29.7707	32.0425	27.3256	33.2567	27.331	41.4901	30.9687	27.3205	33.0538			31.876	3.96549
8.9091	26.5748	26.5748	32.2776	37.4737	37.2964	39.2426	30.2283	37.5411	32.1069	36.1131	30.0319	28.763	31.573	33.0651	34.0773	31.4359	28.0307	31.28	32.5681	28.4028	34.597	30.7041	32.2503	27.6366	33.808	27.5944	41.6253	31.2716	27.3362	31.8291			32.1103	3.87217
9	26.3152	26.3152	34.5579	37.5875	39.0219	38.8059	30.8258	37.4661	33.2869	36.2627	30.7836	28.3145	32.1305	33.9265	34.3152	31.6567	28.6316	31.4337	31.1588	28.0788	35.0971	30.911	32.0951	27.7489	33.6736	27.9009	41.0297	31.2428	27.1712	31.5363			32.3094	3.94951
9.0909	26.4304	26.4304	35.7423	36.9248	37.963	38.9934	31.126	36.312	33.8747	36.878	30.9083	28.1402	32.4044	33.7128	34.1374	32.8924	28.54	31.5957	30.776	28.3027	36.0873	30.3712	32.2319	28.8761	32.6822	27.8019	42.1452	32.7928	28.0532	33.1619			32.543	3.90483
9.1818	27.8862	27.8862	36.0652	36.6434	37.1734	38.8206	29.896	36.758	34.8725	38.1204	31.1621	28.6604	32.3389	34.4838	34.5663	32.2739	28.6058	31.7472	32.164	29.4114	36.2081	30.2952	32.4597	28.8912	32.5093	28.3948	42.1881	32.9275	28.444	33.3133			32.8389	3.72674
9.2727	29.1245	29.1245	36.943	36.0977	37.3269	38.6928	26.0342	38.5803	35.2554	38.2624	31.7639	28.5489	32.4547	33.3571	34.823	32.3089	28.4104	32.6909	30.7623	30.1518	37.2153	30.7195	30.9938	28.3618	33.9538	29.6614	43.15	32.4186	27.7159	32.4581			32.9121	4.02795
9.3636	29.3611	29.3611	36.8167	37.9728	38.2419	38.686	22.328	37.22	35.9263	37.194	32.0265	29.8379	32.4179	33.4187	34.2876	31.4437	28.1835	32.5453	30.9439	30.5213	37.7782	30.9462	32.1826	28.2806	33.8788	29.4354	43.7459	31.8614	27.937	31.1841			32.8655	4.3207
9.4546	30.0494	30.0494	37.9523	37.4686	38.0276	38.4004	18.174	37.931	36.7337	37.8824	32.6057	30.5889	31.6678	33.3221	34.5013	31.4907	29.0266	32.0976	31.0712	29.8407	37.5012	29.9026	32.212	28.8302	34.0751	29.3139	43.676	31.1962	27.9434	31.4581			32.833	4.72659
9.5455	30.2672	30.2672	40.0241	37.4451	37.1825	39.3723	13.4804	38.4142	37.205	37.7742	31.309	31.4375	32.945	32.6603	33.8707	31.9949	30.876	31.4871	31.2655	31.1875	38.7557	26.5956	32.8188	28.9495	34.3949	30.0882	43.0687	31.8431	28.0318	32.0404			32.9017	5.38919
9.6364	30.2015	30.2015	39.8701	38.4282	38.1972	39.9769	11.3796	37.6488	37.3556	38.3267	31.3582	32.2806	33.0449	32.2692	33.6537	31.7063	30.6601	31.601	33.5696	31.3152	39.5534	22.488	33.03	30.4763	34.5929	30.3715	43.2867	32.1367	29.5428	30.8735			32.9799	5.91068
9.7273	32.1768	32.1768	38.8044	37.8657	38.9583	40.0348	10.0206	36.7622	37.5817	38.0334	31.4073	31.5021	33.8072	34.4745	34.3695	32.3977	31.6547	31.9012	32.1683	31.808	41.4674		31.9181	31.2184	34	30.3553	43.4283	31.6516	30.0654	31.5015			33.5694	5.80418
9.8182	32.3391	32.3391	40.0447	37.2886	39.2146	40.4009	9.3348	35.4126	38.6213	38.2831	31.7503	31.6404	34.5334	33.7525	33.5274	34.368	31.5131	31.8633	31.0797	32.5536	40.8843		32.1113	31.7095	34.1216	31.8891	42.5924	33.2674	30.9238	32.2459			33.7795	5.82476
9.9091	31.2624	31.2624	40.1219	36.0474	41.0155	40.3343		32.4983	40.3432	39.5849	31.4191	31.8854	33.5743	34.4176	32.3325	34.9916	32.2427	32.4859	32.6935	33.4146	41.2238		31.8225	32.4597	33.665	32.1805	43.4242	34.0991	31.4559	31.9444			34.7929	3.78595
10	31.6146	31.6146	39.9544	33.6857	41.3641	40.5149		26.8869	41.018	39.3187	32.5483	31.8485	32.9599	34.843	34.3911	36.5491	32.1169	34.594	32.9918	34.6749	41.1276		30.9527	31.7169	33.4493	33.0741	43.1676	35.6011	30.6255	33.9991			34.9001	4.00956
10.0909	32.056	32.056	40.8821	29.4274	40.147	40.3197		20.287	40.9094	39.4985	34.6048	31.4823	33.5483	36.4982	34.9189	37.9609	31.9932	35.1168	33.2749	34.9999	41.4779		32.1061	32.0055	34.3094	33.5548	42.8042	37.2612	31.0628	31.8235			34.871	4.71447
10.1818	31.4637	31.4637	40.6281	22.1713	38.3095	40.0701		15.4927	41.2563	40.3749	34.889	31.0869	32.4375	36.4702	34.6192	40.4206	31.9935	36.5554	33.1314	34.9965	41.3676		32.7276	31.7763	33.3071	33.5238	43.34	38.3304	30.7478	31.9449			34.4606	5.88809
10.2727	32.2068	32.2068	42.4791	16.9223	34.8103	37.6707			41.2874	40.5518	36.9373	32.9306	33.3242	36.1902	34.9552	42.2492	31.9319	38.209	34.4004	35.3919	42.0775		32.9606	32.3243	32.3838	35.1306	44.2777	41.2468	31.1364	32.8668			35.5207	5.42937
10.3636	32.1854	32.1854	41.8504	13.1836		36.4047			41.0103	39.9929	38.3831	33.3119	34.0667	39.1581	34.9466	43.7795	32.2723	40.5002	35.7062	36.9221	42.6482		33.1579	31.3984	34.5761	36.2927	43.701	42.9336	30.2493	32.7445			35.9062	6.24449
10.4546	33.3968	33.3968	42.0048						41.4771	39.7665	40.8089	33.8104	34.0541	40.6844	35.2637	45.2883	33.0624	42.2538	37.1507	38.9254	42.7702		34.6751	32.0549	34.9691	39.5677	43.3967	44.0947	30.7282	33.0113			37.7755	4.4239
10.5455	32.7509	32.7509							42.736	39.5998	42.8781	34.6613	34.0628	41.6734	35.9404	48.3778	34.4081	43.9079	37.806	41.1113	43.3676		34.9572	33.2954	34.6539	40.7936	44.5175	47.3353	32.1747	32.6741			38.5406	5.12527
10.6364	33.0675	33.0675							42.4152		43.5496	35.2512	35.815	42.5295	35.9403	46.266	33.7457	45.1813	40.0232	41.6393	42.9477		36.4258	33.9056	34.9852	40.606	44.8177	48.2892	32.1639	33.7706			38.9274	5.05377
10.7273	32.0342	32.0342							43.3215		46.0372	36.7708	36.4011	45.4685	36.9572	38.7233	35.3408	48.3213	39.5378	40.4622	44.3205		36.5481	34.2008	35.3343	40.825	42.4183	44.2242	33.6703	35.5438			39.0225	4.77692
10.8182	31.6777	31.6777							43.2519		48.1367	37.1126	37.2237	48.7104	37.8316	29.3283	36.2066	46.0968	39.8287	43.1372	45.3605		36.9494	35.0182	35.59	44.6598	42.2569	35.2278	34.1287	37.0093			38.9282	5.50874
10.9091	31.2648	31.2648							43.4531		45.1436	36.7217	37.2234	52.3668	39.2109	19.6906	37.1105	38.7004	40.5584	47.079	45.398		38.5226	35.9845	36.1068	48.9588	42.94	26.3441	35.2788	36.6794			38.4546	7.41524
11	29.2557	29.2557							44.664		36.307	37.0668	38.3254	58.0257	39.6695	14.6058	37.1464	29.1684	43.5301	49.8398	46.7763		39.2407	37.5329	36.1461	47.3447	43.6196	17.3098	36.4989	37.5958			37.6784	9.83463
11.0909	25.5217	25.5217							45.4493			38.7631	39.8643	64.6865	39.6899	11.7343	37.0743	19.657	43.6667	43.4864	47.2514		39.0301	37.0373	37.1202	39.0745	43.4825	13.9144	36.5793	37.3623			36.4746	11.8925
11.1818	18.7021	18.7021							45.4301			39.1965	40.1951	72.0016	37.6889		37.4121	14.5815	42.2235	34.768	45.3811		39.0809	36.5321	37.8721	28.7667	44.7514	11.0437	36.1077	37.1528			35.8795	13.3164
11.2727	13.9571	13.9571							47.2917			37.7368	39.7063	77.321	38.0355		39.64	11.6094	43.8723	23.3517	42.7185		34.1021	38.1563	39.3856	19.2929	44.4526		37.7704	39.2345			35.8733	15.0673
11.3636	11.1317	11.1317							46.8099			38.4249	39.6922	76.2627	37.7151		38.9318		45.3875	16.067	39.4286		25.4211	39.2398	39.7639		43.421		38.9753	40.3677			36.9513	15.2218
11.4546									44.5357			37.1229	33.7882	56.6199	38.3295		40.2841		45.2372	12.1455	36.8654		18.0499	38.9504	39.6121		44.7013		38.0343	41.2481			37.7016	10.6603
11.5455									41.4799			36.2935	24.6932		37.4015		38.9743		44.5572		29.137		12.6983	38.2597	37.5562		45.5883		37.3813	39.8528			35.6826	8.88337
11.6364												33.3748			38.4091		38.4868		45.6689					38.2176	38.2099		45.0164		37.7541	40.8485			39.554	3.81395
11.7273												28.1284			39.3949		36.692		44.5092					36.8124	37.6353		44.1172		36.4225	42.0714			38.4204	4.99891
11.8182												21.2848			38.6945		34.1946		42.8972					35.5743	38.4408		43.5711		34.9863	42.2466			36.8767	6.81193
11.9091															39.1723		27.9294		39.7153					31.8853	37.3728		39.6961		31.4695	42.4897			36.2163	5.12341
12															38.5903		21.1889							25.0117	38.8714		35.1425		24.5062	42.5384			32.2642	8.49476
12.0909															37.9467		15.7614							18.393	38.9747		27.0698		17.8784	42.9346			28.4227	11.4496
12.1818															38.0687		12.4788							13.6135	39.0683		19.6034			40.6562			27.2481	13.4094
12.2727															33.1495									10.8241	38.8978		13.7961			37.8173			26.897	13.5309
12.3636															23.3691										38.5612					29.7231			30.5511	7.62982
12.4546															16.1182										37.9287					20.4539			24.8336	11.546
12.5455																									37.8487					15.2475			26.5481	15.9815
Cell number:	1	2	3	4	5	6	7	8	9	10	11	12	13	14	15	16	17	18	19	20	21	22	23	24	25	26	27	28	29	30
Length (um)	Glycerol																																Mean	Std. Deviation
0	23.037	11.0451	23.4381	11.8778	10.2859	9.2906	8.3302	15.3103	12.9545	30.2866	10.297	7.9767	23.4619	27.7063	22.7905	21.8275	24.0152	12.9577	8.7195	21.7303	12.9302	16.157	12.2431	8.0942	13.8905	16.5728	17.3252	12.9271	20.1081	12.9599			16.0182	6.30795
0.0909	27.0638	12.3107	25.2886	14.336	12.0333	11.0696	9.1815	18.1216	14.5434	30.7326	11.8715	8.5167	25.2803	28.4043	29.8988	24.1018	24.5172	17.1523	10.1356	25.8438	14.4415	22.6662	17.326	8.3345	14.3681	19.6894	20.4371	14.4354	23.0023	14.5534			18.3219	6.81648
0.1818	29.6887	13.8494	26.7415	18.2971	14.3421	13.9439	10.0043	21.5491	16.8359	32.1051	15.2087	9.3598	26.7656	29.3451	34.2268	27.8489	25.8187	21.4306	12.9309	28.9819	16.9045	29.6862	22.6538	9.1145	15.2849	23.3223	23.0907	16.9051	26.6255	16.833			20.9898	7.22377
0.2727	31.0393	16.5236	29.4646	21.7989	18.5481	16.6277	13.7764	22.3782	20.1956	31.6257	20.2128	10.8192	29.4772	30.0816	34.5298	30.2594	26.5096	24.9174	19.5489	32.1579	20.2	34.0761	28.4048	10.3463	17.7565	23.6726	26.8572	20.1945	29.7627	20.1926			23.7318	6.77649
0.3636	31.93	19.8498	30.8416	24.972	22.9918	18.7911	20.1025	22.8649	23.6593	31.9048	23.3678	15.6404	30.8479	28.6588	35.7853	31.8189	26.9182	25.6892	26.7865	33.974	23.5071	34.418	31.1307	14.1277	20.8765	23.7034	29.6829	23.4965	30.8402	23.6699			26.0949	5.5935
0.4545	32.7566	23.003	32.0509	26.2738	26.2773	18.7076	27.0737	22.7776	23.0828	31.9975	25.8424	21.804	32.1265	29.3235	36.938	32.1587	26.0981	25.4419	32.562	36.1386	23.1599	35.9738	31.6741	20.6157	23.4876	23.7421	31.0111	23.1643	31.7725	23.0721			27.6703	5.05842
0.5455	34.075	22.0866	31.6428	26.9082	27.0666	20.3077	32.3095	23.2704	23.6785	32.1486	24.9483	29.3175	31.6551	28.8034	38.1698	31.8427	26.2094	27.1543	34.8588	35.5372	23.4009	36.227	28.9021	27.9545	27.2774	24.1298	31.8772	23.3842	31.4144	23.6984			28.6752	4.66905
0.6364	34.2962	22.8568	31.57	28.2585	27.6411	21.4435	34.4266	23.513	23.4077	32.3136	26.2681	33.6843	31.4838	29.608	38.2511	31.8964	27.273	26.05	35.4434	37.0352	23.5177	37.6565	28.4398	33.2884	30.0828	24.4422	31.4666	23.5257	30.9452	23.4058			29.4497	4.88519
0.7273	33.3675	23.0799	32.4116	32.2226	28.5422	21.6965	35.4005	24.1187	23.8913	32.2752	26.3996	34.5805	32.4068	30.3712	38.1703	33.1615	27.9618	26.4036	37.3669	37.0465	23.7741	37.4392	29.3599	34.5925	31.2469	25.0003	31.091	23.7693	32.0589	23.9067			30.1038	4.94157
0.8182	34.8468	23.3611	30.9312	31.872	28.4123	23.0304	35.9455	25.0345	24.1438	33.0611	26.2936	35.4118	30.9207	29.7538	36.8412	31.9588	27.5657	24.9797	38.743	36.3443	24.0345	36.9065	28.5741	35.1051	32.139	24.7973	32.4301	24.0285	31.3547	24.1507			30.0991	4.87584
0.9091	34.3905	23.6929	30.6604	31.8326	27.3868	23.7105	36.3224	24.2847	24.9692	32.8929	25.4391	36.5389	30.5803	29.6562	36.8359	32.2647	27.3601	25.7338	39.844	35.9325	24.8303	36.1626	27.7762	36.5991	31.7411	25.5003	31.4421	24.8178	31.2893	24.9744			30.1821	4.84244
1	35.2852	24.5248	30.5779	32.2522	28.3	24.604	37.3633	25.1037	24.4634	31.7156	25.0784	37.6151	30.5244	30.3901	36.9589	32.0527	27.6779	25.1318	39.4924	37.5013	24.4103	36.1995	27.786	37.4432	31.3234	26.1402	31.5076	24.4151	30.9222	24.4841			30.3748	5.00005
1.0909	35.6129	24.1612	30.3351	32.4361	28.3207	24.5855	36.4258	24.7218	25.4144	33.1667	25.5335	37.991	30.3424	30.7363	37.3745	31.2933	28.7741	25.5664	39.8141	37.281	25.1717	35.5785	29.0326	38.6302	32.7352	25.4676	31.2362	25.1598	30.4901	25.4304			30.6273	4.93803
1.1818	37.4205	24.8426	28.8686	33.3656	29.1965	25.2713	35.8949	25.0794	25.7397	33.6142	24.926	37.2602	28.8128	30.8531	36.4742	31.438	28.8883	25.6744	38.1214	36.5789	25.6451	36.0926	28.3719	37.3491	31.7037	25.6381	30.7827	25.6445	30.3504	25.7497			30.5216	4.64422
1.2727	36.9156	25.1756	28.7549	32.8102	28.6879	25.87	36.3541	26.1951	25.2487	34.6208	25.7385	36.3876	28.7382	30.9474	35.734	30.9496	28.3519	26.6588	38.1793	36.552	25.2731	35.0803	29.2638	37.6265	31.8217	26.2299	30.6915	25.2757	30.8818	25.2498			30.5421	4.46735
1.3636	36.5248	24.7079	27.2107	33.2138	28.5572	26.8105	35.3954	26.9261	25.277	33.8752	26.0527	36.01	27.1581	31.5608	36.2236	31.6648	28.4033	26.8018	38.355	37.9595	25.178	34.6141	28.0857	36.6765	31.4173	28.0366	30.8995	25.1813	31.111	25.2937			30.5061	4.41337
1.4545	37.1457	24.7567	28.1695	33.8677	29.1438	26.438	35.5488	27.6538	26.7018	33.5172	26.7483	35.6226	28.1173	31.2857	37.2737	31.1173	28.3313	27.2368	38.6717	38.1456	26.1961	35.6886	27.5409	36.8727	30.8903	27.8759	31.2236	26.1562	30.9897	26.7487			30.8559	4.29353
1.5455	37.7072	26.8001	27.9619	33.4896	29.4285	26.1704	34.7707	27.8715	27.6438	33.7508	26.4143	36.0224	27.9301	31.756	37.2785	30.7626	29.0209	28.1593	37.7907	37.3864	27.6165	35.9179	26.847	37.4315	30.8922	27.7691	31.01	27.6234	30.1163	27.6407			31.0327	4.02333
1.6364	38.0631	27.2232	29.1665	34.6407	30.2211	25.698	34.2016	28.3829	27.8633	35.7683	27.0983	35.2863	29.1391	31.5218	36.3079	31.0694	28.8041	28.4386	37.3383	38.3584	27.7512	36.7906	28.3287	36.7227	31.0247	28.3478	30.3322	27.7322	31.1405	27.8662			31.3543	3.88888
1.7273	37.8806	27.5146	28.3736	34.4822	29.7929	26.4449	34.771	29.293	27.619	36.2651	27.8671	34.7709	28.4018	30.6481	36.7804	30.6724	28.9573	27.7681	37.8808	38.7421	27.6009	36.1198	28.2941	35.8385	31.2626	29.6844	31.1465	27.6114	30.4062	27.6317			31.3507	3.86474
1.8182	37.0792	27.5378	28.3346	34.2964	30.1767	26.3268	34.9844	29.238	28.7261	36.1571	28.2833	35.4308	28.2456	31.5797	36.3451	31.1527	28.8043	27.9887	38.2841	38.1046	28.6506	35.6233	28.7766	36.4003	31.0573	29.3664	30.4824	28.6246	31.3446	28.7368			31.538	3.65433
1.9091	37.1422	28.9173	28.8115	35.2359	30.4959	26.2694	36.3765	29.2325	29.6749	37.7234	27.4454	35.9764	28.7869	31.4292	36.425	30.9168	29.0789	28.5987	37.8033	38.2083	29.4009	35.5294	28.7364	36.6968	30.4272	30.1487	31.3103	29.3933	30.9238	29.6965			31.8937	3.65855
2	37.0768	29.4523	28.2143	34.7006	30.8083	26.636	35.7478	29.7887	29.5367	37.5125	28.199	36.5057	28.2187	32.2191	35.9953	31.0813	28.9838	28.9195	37.1723	37.3748	29.8276	35.8571	28.7902	37.744	31.1276	28.8911	30.9211	29.8159	31.3663	29.5057			31.933	3.54938
2.0909	35.764	29.3656	28.5581	34.2983	30.6957	26.7364	35.4755	29.3695	30.0818	37.6761	28.2826	35.6654	28.531	31.7689	37.7674	31.4187	28.4881	28.5805	37.2871	37.6639	30.3038	36.4416	30.5245	37.0599	30.4898	29.227	31.4531	30.3201	31.224	30.0462			32.0188	3.46125
2.1818	36.0789	29.7752	29.5171	33.8865	30.6066	26.7612	35.158	30.5596	28.8255	38.1611	27.585	35.606	29.46	32.0464	38.2475	30.8844	27.7151	28.3479	37.2375	37.1561	28.8105	36.8787	31.5611	36.5972	31.2903	29.4262	31.2009	28.8067	31.0693	28.8191			31.9359	3.57119
2.2727	37.0214	28.9429	29.9024	33.762	30.9767	26.7542	34.2771	29.2508	29.5167	35.7903	27.7127	35.6439	29.825	31.5003	38.1078	30.7364	28.9609	29.4728	36.0121	36.5606	29.5402	37.8495	30.2452	36.6149	30.9702	29.1173	31.0514	29.5258	30.2253	29.5031			31.8457	3.33049
2.3636	37.1322	29.8685	29.4601	34.1974	30.9018	27.37	36.1748	30.248	29.5803	36.8411	28.4035	36.0422	29.4006	31.5013	38.3803	30.03	28.6044	29.9405	37.0599	37.9992	29.4718	38.2761	29.7614	36.3596	31.4939	29.3916	30.3771	29.4604	30.1962	29.5724			32.1166	3.55988
2.4545	36.3632	29.8277	30.5257	32.7274	31.6881	27.6542	36.5267	30.3879	29.1908	36.4478	29.299	35.5235	30.4862	31.1673	38.6239	31.2115	28.3568	30.0734	38.2612	37.5135	29.4646	37.4259	29.1521	36.4349	31.2423	30.331	30.2352	29.4844	31.66	29.1714			32.2153	3.38945
2.5455	37.1591	29.3924	30.526	33.6558	31.3761	27.806	36.7041	30.2512	29.8277	36.3595	29.3469	37.2253	30.4678	31.8543	39.2676	31.1132	29.081	30.5578	38.4835	37.6397	29.651	38.7989	29.3625	37.2376	31.037	30.426	31.5399	29.6396	30.9278	29.849			32.5521	3.58122
2.6364	37.2705	30.058	30.3617	33.2025	31.2032	28.7023	37.5238	30.099	30.6944	36.1495	30.405	37.741	30.2389	31.4171	38.3961	30.0677	29.2364	31.1648	38.0921	37.9892	30.7328	38.3142	29.6919	37.801	30.3814	29.6908	30.9326	30.7225	30.3701	30.6805			32.6444	3.46542
2.7273	36.9294	30.7356	33.1756	33.3849	31.5579	28.7793	37.1609	29.7424	30.4194	36.6857	30.4346	37.9934	33.1235	32.5209	38.7461	30.06	30.1124	31.1617	38.6477	37.9431	30.5149	38.8893	29.8256	38.7902	30.2461	29.5075	30.398	30.5171	29.9984	30.4078			32.947	3.53848
2.8182	37.3676	30.2612	33.2682	32.882	31.1071	29.3486	36.8882	29.5219	29.819	36.9347	30.9404	37.7088	33.1574	32.7483	40.5951	30.152	30.0576	31.8467	38.6846	38.1488	29.9649	38.9053	29.326	37.7852	31.6037	29.7828	30.0394	29.9749	30.4341	29.8088			32.9688	3.64333
2.9091	38.0432	29.7591	34.6205	33.4074	31.6917	29.3279	37.9763	30.4167	29.5693	36.3101	30.3784	38.6852	34.5579	33.7293	40.7135	31.4088	28.7931	31.9617	39.0282	37.697	29.7787	40.1937	28.9969	38.5641	30.8318	30.3825	30.3211	29.7957	31.4696	29.5546			33.2655	3.89365
3	37.8071	29.5879	34.3106	34.4433	31.2441	29.8902	37.8491	29.8458	30.0724	35.4154	31.4406	38.4271	34.2694	33.7591	39.6688	32.1525	29.0219	31.1365	38.0159	37.8192	30.2242	40.6891	29.2021	38.6023	30.3632	28.7796	31.6268	30.2129	32.247	30.048			33.2724	3.71497
3.0909	37.3666	30.3738	33.6817	33.88	32.0477	29.5842	38.1657	29.5008	30.3917	35.1161	31.1511	38.4657	33.7282	34.6702	39.9647	31.6508	29.5104	31.5518	39.2344	39.2162	30.5232	39.3355	28.5134	39.1837	30.035	29.3287	32.3061	30.5614	31.4868	30.3874			33.3638	3.74716
3.1818	38.9126	30.3326	32.4346	34.2916	31.4203	29.2698	38.9979	29.2325	28.977	34.8765	31.1031	38.4076	32.4629	36.2159	39.9114	31.9913	28.8256	30.9639	40.166	38.9423	29.0947	40.2142	28.6324	38.4267	30.2919	29.5576	31.5998	29.1204	32.2765	28.965			33.1972	4.146
3.2727	39.5929	29.0705	31.656	33.3818	33.0745	29.3256	40.05	28.5301	29.5299	34.7228	30.7496	39.9661	31.6437	38.5727	40.8017	31.7727	28.7627	30.2186	40.2141	39.5286	29.4016	40.0248	29.5933	39.9333	31.6782	28.0953	32.1866	29.3975	32.731	29.5023			33.4569	4.53238
3.3636	39.6296	29.5917	31.6082	33.8847	32.9266	28.2863	38.9342	28.3785	29.4881	35.7677	30.8244	40.6178	31.6506	38.2542	40.9274	32.0088	29.7947	31.3455	39.2179	40.102	29.8574	40.3734	29.6202	41.0266	32.2899	28.3051	32.6316	29.8763	31.8466	29.454			33.6173	4.51133
3.4545	38.0988	29.2572	31.6512	33.1507	33.5635	28.894	39.4344	27.9946	28.0745	35.018	30.4289	39.4261	31.6013	40.2452	39.8636	30.4041	31.1973	31.4323	39.6413	40.4506	28.2318	41.3135	29.1963	39.5821	31.5237	28.1641	31.8089	28.2495	30.7877	28.0742			33.2253	4.70572
3.5455	38.6599	28.0683	31.123	34.4888	33.7739	28.5413	39.9748	28.711	28.3857	34.9389	30.9477	39.7476	31.1536	43.2602	38.6084	30.8217	31.4857	31.0091	39.4677	40.8027	28.6178	39.7305	28.7669	39.9281	32.1326	28.0575	30.7904	28.6216	31.3363	28.3718			33.3441	4.83718
3.6364	40.096	28.311	30.7504	35.9185	35.0854	28.3242	39.2517	28.5644	28.3618	35.0067	30.8595	39.9265	30.7286	45.7121	37.7561	31.0607	32.8589	31.3824	40.6861	39.6589	28.5096	39.1197	28.2891	40.1033	32.6314	28.1734	31.2338	28.5214	31.1888	28.3607			33.5477	5.05438
3.7273	40.9719	28.3082	30.973	37.5579	37.0173	29.1925	40.5816	28.2988	28.2365	35.7112	30.568	40.3018	30.9594	46.3323	38.1727	30.5139	33.8464	31.1717	39.9263	40.9102	28.177	37.245	27.3174	40.1319	31.6589	28.3921	31.3138	28.187	31.6454	28.2522			33.7291	5.32172
3.8182	41.3582	28.2797	30.1182	40.1149	39.1394	28.3707	40.385	28.7954	28.3047	34.1417	30.2777	41.1606	30.0839	47.9786	39.2206	30.7905	33.9068	31.8081	39.3247	41.6927	28.4339	38.5365	27.8764	41.2746	30.6958	28.5792	31.2679	28.4285	30.9957	28.3062			33.9882	5.77072
3.9091	41.3253	28.2048	30.6296	43.1816	38.4571	28.2681	38.9505	28.7391	28.3228	35.0013	31.3969	40.1257	30.5751	48.326	39.1636	30.976	35.0539	32.3172	37.5146	41.9275	28.2342	39.2177	26.4872	40.0067	31.1806	28.9335	31.1704	28.2426	31.3141	28.3798			34.0541	5.76474
4	42.6756	28.2677	31.0317	44.123	41.389	28.6156	37.7705	30.7489	28.8277	35.6259	32.3384	38.9103	30.9629	48.0816	38.8857	30.7764	35.6848	31.4907	37.7665	43.4675	28.795	39.5654	27.576	38.9028	31.2064	30.3413	31.3169	28.7551	31.0684	28.8389			34.4602	5.71427
4.0909	43.492	28.6331	31.2922	45.212	44.5115	28.8423	37.7272	33.5111	29.1761	34.7368	31.9534	37.6787	31.288	48.3309	38.4354	30.3159	36.9307	32.1115	37.7558	43.6902	29.0745	38.7226	27.213	37.6459	31.1446	33.5425	31.0232	29.0798	30.5528	29.2022			34.7609	5.80049
4.1818	44.4405	29.3329	30.7778	46.6046	45.9442	29.0867	39.0187	34.6603	31.1561	35.384	31.7889	38.0012	30.7619	48.4015	38.3427	30.5716	37.5336	31.1373	39.0553	45.6777	30.5322	38.6725	26.2296	37.9683	31.1705	34.7333	30.4764	30.437	31.0278	31.2229			35.3383	6.04848
4.2727	46.5325	31.3986	31.2991	46.1715	47.1367	29.0018	39.0887	36.3261	34.2293	34.6144	31.0196	38.8287	31.1717	48.023	39.6281	31.4862	37.2393	32.4691	38.6388	44.8877	33.6417	38.5458	25.681	38.5733	31.2006	36.0138	30.9714	33.5467	31.731	34.2918			36.1129	5.81253
4.3636	49.0942	34.2143	31.1968	46.201	48.4124	28.1236	39.2634	37.733	34.992	35.8517	31.563	39.6163	31.1291	47.6065	39.2147	34.3343	38.0347	32.5049	38.3096	46.9705	34.8943	39.6827	25.6417	39.5773	30.944	38.1489	31.8554	34.8909	34.5223	35.0244			36.9849	5.97819
4.4545	52.981	34.8637	30.7	46.1192	48.7154	28.4792	38.6001	39.0889	36.7523	35.5544	32.5909	38.8875	30.7251	47.3074	38.8013	35.2545	38.3513	32.81	37.9242	51.2649	36.1721	39.6866	26.0523	38.5621	30.4106	38.836	34.8812	36.1068	35.2902	36.8078			37.6192	6.36288
4.5455	53.0344	36.5474	32.4866	44.9427	48.6102	29.1022	38.598	39.2861	38.4093	37.2339	32.2704	38.6152	32.4927	47.2994	38.1716	36.5471	37.2681	32.7414	38.4189	53.4917	38.0775	39.2314	25.4362	38.359	30.941	40.2732	35.3989	38.0438	37.4208	38.4673			38.2405	6.27488
4.6364	53.4847	38.0136	33.8621	43.1995	49.0206	29.3873	38.765	41.711	39.1687	38.3873	32.7445	38.3701	33.6982	47.1464	39.1239	38.9066	37.8903	32.5651	38.8583	53.9668	38.9198	38.5381	26.3841	37.9844	31.9148	41.9162	37.6083	38.8967	39.7468	39.1406			38.9773	6.09622
4.7273	55.1628	38.8985	36.0495	43.0727	48.7991	29.6675	39.8986	44.0075	40.7588	36.7676	32.9537	39.7584	36.0218	47.6132	38.9745	38.9548	37.622	33.3358	38.2259	54.3814	40.3493	38.9313	26.4514	39.1646	34.9428	43.1621	39.5664	40.2717	39.6032	40.7696			39.8045	6.08587
4.8182	58.6752	40.3632	35.8512	43.295	48.4923	31.8572	39.6741	45.2979	42.3091	37.6698	31.8827	39.6106	35.8813	46.6648	38.8106	40.1575	36.7374	33.3513	38.4192	56.0143	41.7543	39.168	26.0368	39.323	35.3401	44.9415	39.598	41.7394	41.3046	42.3146			40.4178	6.55832
4.9091	57.866	42.3053	38.1739	41.1079	47.9065	34.2415	38.567	45.7202	43.4566	38.6446	33.3702	38.845	38.0135	43.0933	38.9744	40.4314	35.3763	32.9999	37.5859	56.7799	43.0253	39.4167	26.3643	38.5697	37.7671	45.8778	41.2132	43.0216	41.1672	43.4789			40.7787	6.25327
5	60.8648	43.7448	39.5239	38.8206	47.4775	36.5188	38.9566	45.696	45.3525	37.9338	33.3167	38.8351	39.3943	40.5559	40.8084	40.6281	34.632	32.7526	38.9995	58.4719	44.862	39.1527	27.4024	38.279	39.4751	45.6459	40.9913	44.7534	42.0132	45.389			41.3749	6.63037
5.0909	62.0502	45.3945	40.2433	37.2091	47.4831	38.6841	38.8367	44.8617	46.3543	39.4185	32.99	38.7964	40.3019	40.1472	41.5227	41.6165	33.403	33.4875	38.437	61.0589	46.0692	40.9809	29.0877	38.58	39.5826	46.079	41.7901	46.0391	42.3715	46.3384			41.9738	6.94484
5.1818	60.6507	46.1823	39.8284	37.3761	47.9142	40.9432	39.7399	47.2841	45.2867	39.9432	33.5556	39.3048	39.7891	38.0625	44.722	40.2266	32.5821	34.8153	38.3936	62.858	45.8956	42.5014	29.3054	38.8615	41.1519	46.8008	42.221	45.9479	41.2251	45.2555			42.2875	6.96801
5.2727	61.5934	44.5386	40.5203	36.1765	48.2667	44.1157	39.128	49.0797	46.4459	40.3598	34.4174	39.2054	40.3174	36.1022	46.8755	40.0176	31.2051	35.6001	38.6829	63.12	46.0498	44.9906	29.4671	38.8118	40.8763	49.5115	40.9042	45.9824	40.367	46.4713			42.64	7.36696
5.3636	63.1986	46.2149	41.5021	35.4399	46.6264	43.9005	40.6209	49.4399	47.2919	40.9152	34.8865	39.0411	41.6221	35.6616	49.1813	39.1722	30.2426	36.3663	40.5688	62.9117	46.6781	47.1838	30.0793	38.5173	41.8084	48.5425	40.2605	46.6728	39.8483	47.3762			43.0591	7.56813
5.4545	62.4017	47.6405	42.1628	35.1554	43.0919	46.2851	42.7642	51.0708	49.5075	41.3119	35.4872	40.426	41.9695	35.3184	50.2994	39.8916	29.0085	36.7104	41.0957	63.6842	49.4613	49.0222	31.1814	40.1989	42.0095	51.3093	39.6003	49.394	40.6873	49.4635			43.9203	7.88708
5.5455	61.3783	49.0366	41.5149	32.8274	41.2934	47.1128	44.6407	50.3948	48.8225	42.151	37.1063	41.7037	41.7584	36.0313	52.3343	39.7418	29.1864	38.2968	44.7177	64.4066	48.5184	50.4567	32.5618	41.1106	40.824	51.0968	40.656	48.5161	40.3025	48.8723			44.2457	7.76844
5.6364	60.1968	49.1315	40.4033	32.8839	40.7531	48.1743	46.6442	49.7492	51.7243	43.3954	38.0234	44.2024	40.2977	33.6466	53.4568	38.0268	29.1506	40.4445	46.958	64.4139	51.0815	52.1188	33.6531	43.5348	40.1248	49.4962	40.1014	50.9475	38.4294	51.7015			44.7622	8.09119
5.7273	56.3422	51.2414	40.7217	31.1134	38.4163	49.4999	49.1011	48.6667	50.9133	44.3956	40.0825	46.6055	40.7305	33.5494	52.7645	35.3923	28.2911	41.714	48.8903	61.7401	51.205	53.956	34.343	46.0403	39.5801	48.6713	37.9988	51.2869	35.7175	50.8517			44.6607	8.10215
5.8182	55.6309	50.3809	40.8058	30.3204	36.2846	49.255	49.9433	48.677	49.491	43.6483	41.1586	49.1331	40.7613	34.7209	53.805	35.0212	27.1376	42.861	50.4999	58.7528	49.8436	52.9616	34.0257	48.4066	40.6172	48.0148	35.6242	49.891	35.3142	49.4331			44.414	8.02334
5.9091	54.4268	48.9884	40.5163	29.9817	35.6647	49.8358	51.8449	46.4727	48.4473	44.105	43.446	49.9956	40.3774	35.5103	56.5579	34.3509	28.1728	44.2679	51.8179	57.6786	48.7555	54.6883	35.1764	49.3581	39.912	47.233	35.2086	48.8042	35.1165	48.3561			44.5023	8.02058
6	50.6501	48.0095	38.6206	30.9708	35.8874	50.3179	53.6064	47.3541	47.9752	44.9369	43.4364	51.9399	38.7802	35.0819	56.6494	34.7019	28.4236	44.7099	53.0016	55.8034	47.9361	56.2599	36.0134	51.318	37.6403	45.9364	35.0046	47.9255	34.772	47.9696			44.3878	8.06243
6.0909	48.7987	47.226	38.3927	30.4283	35.9996	49.233	53.2034	43.8326	46.8422	44.1663	45.4014	53.415	38.5116	35.739	55.7508	33.2497	29.1676	44.7425	52.0008	52.4855	47.2126	56.239	36.9412	52.9349	35.5573	44.3563	34.6091	47.2951	33.5279	46.7653			43.8008	7.89769
6.1818	46.0175	46.3996	36.3743	29.7532	34.0213	48.8577	54.6716	42.703	45.9011	44.3929	44.791	53.5029	36.3831	35.8963	57.664	32.0808	28.7632	44.3877	53.7556	50.3822	45.7869	55.5655	37.8043	52.529	35.0728	41.6417	33.2471	45.7977	32.3755	45.8783			43.0799	8.28484
6.2727	42.665	45.349	35.3471	30.0805	33.816	47.808	56.2373	40.0557	43.6449	44.1345	44.6628	53.4627	35.4542	35.2288	55.7743	31.6784	28.5704	44.6923	56.5623	45.9095	44.6748	57.615	37.6185	53.116	35.0197	38.8536	32.3804	44.804	32.1534	43.5258			42.3632	8.50748
6.3636	40.7773	42.7907	32.8113	28.7442	35.2185	47.1806	56.0405	37.0461	41.483	44.3367	45.2759	56.1533	33.0491	35.4459	54.3838	30.3136	27.4014	43.8893	55.8508	44.0805	41.7045	56.7935	37.1835	55.4051	34.4264	37.2359	31.7797	41.7503	29.9396	41.4203			41.3304	8.9792
6.4545	40.3001	40.8954	30.6252	28.6077	35.917	46.0995	55.7972	33.7795	38.6743	44.1551	43.1811	57.245	30.7203	36.0442	54.123	29.5369	27.2879	44.0081	55.9042	41.7335	39.2688	54.6267	38.71	56.189	33.0609	34.2653	30.1479	39.3719	30.0316	38.5889			40.2965	9.26053
6.5455	39.6093	38.1571	29.5946	29.2511	35.3105	45.3322	57.1554	33.3732	36.6795	44.6741	43.9851	56.1	29.5613	36.8453	53.6732	29.7531	28.3541	43.7012	57.0274	40.88	37.8872	54.4192	39.3948	55.2569	32.3742	31.6835	29.7584	37.9584	30.0348	36.5129			39.8099	9.40864
6.6364	38.1334	35.5407	29.6787	28.2924	35.6885	43.8981	58.332	30.6309	33.672	44.4994	45.0489	57.1845	29.7035	36.2372	52.4235	29.7506	28.5256	41.4252	54.8876	39.6539	34.5291	53.8843	40.2186	56.6557	31.5094	30.43	30.2512	34.6788	29.6652	33.6437			38.9558	9.72447
6.7273	37.171	33.2264	28.8101	28.9169	35.7374	42.666	54.8817	29.5678	31.4189	44.2311	43.4376	57.4549	28.8927	35.8993	51.6473	30.1427	27.8463	41.4804	53.5951	40.0933	31.7393	52.6088	40.7357	56.3403	30.1298	29.5009	29.6171	31.805	30.1171	31.407			38.0373	9.66082
6.8182	37.6527	31.2106	28.5273	29.2594	34.9783	41.035	55.4058	29.138	30.0762	44.7005	41.8425	55.5198	28.4265	35.2892	50.3137	28.6898	28.2089	39.8094	53.8888	37.9528	30.6727	51.2016	40.4575	54.276	29.6516	29.5483	30.2843	30.7556	29.3588	30.0414			37.2724	9.47714
6.9091	37.7005	29.7282	29.0685	30.0338	35.0247	40.8881	54.3104	29.4079	29.5125	43.8938	41.7033	54.2154	29.1011	34.8694	50.8925	28.5548	28.3528	38.826	52.5362	37.8356	29.5007	50.1759	39.2292	53.2634	30.2726	29.2209	28.9845	29.4899	28.9662	29.5216			36.836	9.21023
7	36.8203	28.9952	28.0414	30.2811	36.1605	39.232	53.2279	28.956	29.5194	42.5866	40.3546	55.2336	28.0208	33.6898	49.4855	28.7232	26.8743	39.0912	51.8578	38.7697	29.5651	50.2842	39.405	53.5785	29.5752	28.2692	29.0255	29.5691	29.3414	29.5117			36.4682	9.22831
7.0909	36.2289	29.1556	28.319	29.7856	36.4739	38.4719	51.6592	28.4243	28.9759	42.8155	40.3126	52.9181	28.2044	34.2831	46.7117	29.1168	26.8059	37.3378	50.8632	37.1164	29.2241	50.0416	37.9104	51.8182	30.2123	29.4808	29.3119	29.2434	29.2066	28.9584			35.9796	8.60519
7.1818	37.211	28.6684	29.503	28.1329	35.9268	35.5844	50.574	29.4735	28.3911	42.5192	39.6519	52.6336	29.4832	34.6892	46.4727	29.1731	28.4644	35.5302	49.9896	37.2962	28.1875	46.9312	36.0525	50.7642	28.8537	28.4184	29.3574	28.181	30.0298	28.444			35.4863	8.2146
7.2727	37.2435	28.1599	29.9395	28.7885	35.4127	34.1777	49.6558	29.1599	29.619	41.0823	36.685	51.4058	29.8654	34.6008	43.3777	29.5919	26.2739	34.4223	50.1977	37.0011	29.1816	46.6784	35.7833	49.6767	29.0105	28.8259	29.7183	29.1317	29.8237	29.6473			35.1379	7.69811
7.3636	37.5643	29.2213	30.8	29.884	34.8186	34.4106	51.1521	28.6534	28.3366	40.0576	35.1473	51.0121	30.6678	34.8522	42.7701	29.5724	26.7957	32.5975	48.8679	36.9085	28.4825	43.7457	33.8765	49.3862	29.3097	28.8747	30.0251	28.5792	29.9405	28.3943			34.8235	7.47583
7.4546	37.3274	28.3441	30.128	28.332	34.1861	31.9668	48.066	28.5386	28.9298	40.1922	34.3841	51.3716	30.1674	33.659	40.9867	30.6646	25.9936	31.4026	46.2589	37.4367	28.6313	42.665	33.5947	49.8777	29.3435	28.6585	29.9734	28.5887	31.2594	28.8948			34.3274	7.13882
7.5455	36.5202	28.6767	29.9121	29.4517	33.1216	29.3589	47.2977	28.5971	28.8805	40.0859	32.7542	48.232	29.796	33.8973	38.8661	29.8896	26.4387	30.6828	45.0791	37.7314	28.8326	41.1716	31.6769	46.4156	29.6486	28.7082	31.2605	28.8085	29.8462	28.8415			33.6827	6.40794
7.6364	36.8732	28.4611	31.6354	28.7532	33.8106	27.3962	44.4968	29.4322	28.6147	39.914	31.5649	47.5822	31.571	33.8384	37.7695	29.6004	25.9992	29.8946	43.1874	37.0943	28.6301	38.9303	30.469	46.1203	29.9769	29.5084	29.6089	28.6313	29.6865	28.5975			33.255	5.99883
7.7273	35.8329	28.2889	32.5051	28.7544	34.0909	26.8411	43.5569	29.2995	28.8222	39.5742	31.0738	45.3415	32.6191	31.3114	37.5929	30.142	26.2011	30.0415	42.2334	36.8543	28.5886	38.0597	28.0967	43.3843	30.0967	29.0853	29.8065	28.5527	30.6693	28.8411			32.8719	5.47629
7.8182	35.4895	28.8007	30.9471	27.7061	33.6859	25.9233	41.9335	28.5241	29.648	37.1894	30.7911	43.7041	30.9459	30.6092	38.0095	30.2353	26.1296	30.1037	40.0484	36.5396	29.3629	37.4609	25.9182	42.1779	31.153	28.4868	30.6967	29.3112	30.3991	29.6459			32.3859	5.02438
7.9091	35.1442	29.5745	30.73	27.9672	33.7595	24.8509	39.6876	28.5031	28.9745	35.6625	31.2996	42.6353	30.8498	31.265	38.8427	30.7281	26.9912	30.5655	38.376	36.1295	29.2895	37.9418	25.9787	40.9603	29.5596	28.0804	30.4983	29.309	30.4654	28.9998			32.1207	4.66621
8	36.1293	28.6673	29.4476	28.775	32.9173	26.0488	38.695	28.2464	28.3746	35.1775	31.257	40.3887	29.51	31.6143	39.1091	28.8063	26.2646	29.3169	37.2583	35.5125	28.8068	38.1845	25.6061	38.5602	29.9086	27.6644	30.3885	28.8869	29.4301	28.3134			31.5755	4.41076
8.0909	34.8474	28.1685	28.3459	28.6186	33.0967	26.0644	38.4487	27.855	28.0529	35.8865	30.4579	38.5556	28.4058	31.3158	38.5431	30.3952	25.481	29.7458	36.9961	35.8849	27.822	39.15	25.0309	37.1335	30.6916	27.4914	29.3598	27.7851	30.2001	28.1057			31.2645	4.38521
8.1818	34.91	28.1305	29.9398	29.3074	32.781	25.7366	37.46	27.0085	27.4361	36.6193	29.7809	38.2775	29.7696	32.0937	37.4633	29.8623	25.5543	30.5115	37.8039	36.1343	27.6925	37.6692	23.7454	36.7555	30.5206	27.3061	30.3883	27.7223	30.2875	27.4835			31.205	4.31869
8.2727	34.4718	27.3656	29.3095	28.8494	30.5678	26.0504	38.3038	27.6607	27.4665	35.9619	31.0844	38.5148	29.3509	31.0908	39.1613	30.4631	25.6047	29.3954	38.3629	35.446	27.3026	37.6711	24.2033	37.3262	30.1453	27.6058	30.3342	27.3074	29.9777	27.5557			31.1304	4.44862
8.3636	34.5736	27.3013	29.4981	28.7548	30.1344	26.0225	38.9598	27.6105	27.2834	33.9284	30.7136	38.5446	29.4161	27.55	39.0293	30.3232	24.348	29.7551	39.0442	34.8324	27.2446	38.6729	24.2927	37.5499	29.5058	27.4089	30.1435	27.2527	30.1498	27.3303			30.9058	4.63398
8.4546	34.2306	27.1356	29.853	29.2284	30.7528	26.2135	37.9084	27.411	27.4203	33.6079	30.5938	39.924	29.7091	23.5731	39.1147	30.3431	23.8548	28.7789	37.8508	35.1133	27.3296	38.8817	24.0132	38.4048	30.366	27.5149	30.5543	27.3423	30.815	27.4436			30.8428	4.81761
8.5455	33.9236	27.2671	31.0313	28.0762	30.9555	25.8177	37.5762	27.7247	27.4373	35.4601	29.436	39.5942	30.9624	19.0931	37.3574	30.0518	23.9574	29.0567	37.4216	34.1187	27.1823	39.161	24.485	37.734	30.4171	27.8064	30.5945	27.0984	30.2945	27.4555			30.6183	4.95416
8.6364	34.3408	27.2852	30.4799	28.6264	30.5914	25.9717	38.9879	26.8927	27.5781	34.8603	30.0296	37.6664	30.4069		37.8914	30.2926	22.2198	29.8354	38.7901	34.5539	27.5736	37.2402	24.5092	36.8503	30.1387	27.8062	30.2852	27.613	30.5679	27.5879			30.9473	4.51507
8.7273	34.1925	27.5528	30.7044	28.9677	31.3954	25.3834	38.6103	27.5341	27.662	33.6084	30.206	39.187	30.5475		38.7451	30.0902	22.1451	31.0713	38.9985	34.6229	27.7869	38.0417	24.7668	38.3246	30.6556	27.364	30.7304	27.7528	30.2217	27.6363			31.1898	4.69539
8.8182	35.0669	27.3662	32.2018	29.9564	30.5729	25.4942	39.1722	27.8803	27.874	34.2111	31.0829	39.5297	32.1267		37.5782	30.0922	20.79	30.0236	38.3765	33.9741	27.7827	37.4991	25.6798	38.2459	30.5396	27.5561	29.9504	27.7582	30.1871	27.8693			31.2565	4.67361
8.9091	34.488	27.5964	31.2622	29.7311	27.4774	26.2757	38.3475	27.5355	27.3639	33.646	30.9298	40.1937	31.1112		37.7888	31.1903		29.7751	37.2861	34.7271	27.4838	38.2441	24.8145	38.7854	30.3803	27.3058	30.7541	27.5796	31.2096	27.3699			31.4519	4.42614
9	33.6771	27.2543	32.0387	29.7702	23.2964	24.7062	37.4966	26.5511	27.5728	33.616	30.7305	38.0073	32.182		38.1711	30.5755		29.2528	37.5989	34.2697	27.2636	37.1153	24.8903	36.4734	30.7048	27.0044	31.0598	27.2288	31.0661	27.5295			30.968	4.4043
9.0909	34.7708	27.4407	31.2528	30.7079	18.9056	24.9906	37.8723	26.5863	27.2706	33.3336	30.0421	38.5706	31.2552		37.4743	30.6751		30.1588	38.855	34.1308	27.2507	37.6722	25.3683	37.4907	29.8431	26.5904	30.836	27.2454	30.3842	27.2569			30.8654	4.90362
9.1818	33.3686	26.8657	32.3724	32.0862	14.5519	24.7672	37.3446	27.335	26.8123	33.8544	30.1999	38.4283	32.2919		37.9447	30.9765		29.8149	37.2497	34.144	27.1988	37.1081	25.0311	37.0554	30.9868	27.5635	30.6326	27.2538	30.6284	26.7913			30.7378	5.22299
9.2727	33.0468	26.6391	32.6378	31.9828		25.0919	37.9209	27.252	26.5049	33.7103	31.578	39.187	32.6376		38.3449	30.0977		30.9285	37.8203	33.5981	26.2934	37.467	23.7653	37.6843	30.9483	27.438	30.5276	26.2619	30.1207	26.5874			31.336	4.5695
9.3636	32.9347	26.3625	32.0041	35.4119		24.7155	36.86	27.8136	27.658	32.971	30.7629	38.0657	32.2035		38.0922	30.2153		30.3167	37.5899	32.9891	27.0753	37.2659	23.8027	36.6763	30.8166	28.1568	30.3335	27.0403	30.3537	27.65			31.3384	4.23553
9.4546	32.8283	27.4671	31.1671	37.5165		24.6253	37.6164	27.8361	27.4031	32.3185	31.2498	39.0514	31.0975		37.6451	29.9583		30.8854	37.2734	32.4548	27.3671	37.7428	23.4703	37.2396	30.6494	27.3842	30.4231	27.3936	29.7798	27.4039			31.3796	4.43067
9.5455	33.1899	27.3457	31.0209	40.505		24.4262	37.5284	27.7274	28.2182	33.1172	31.9435	39.0079	30.9913		37.555	28.5411		30.0071	37.7677	33.0148	27.721	37.0655	23.309	36.5852	30.4235	27.8112	29.5352	27.6523	28.5288	28.2577			31.4369	4.60916
9.6364	32.8279	28.0166	31.0399	43.0982		25.2545	36.6476	27.9056	27.3184	34.3169	31.3437	38.4586	31.0021		36.7684	28.5077		30.686	38.062	33.478	27.6948	37.0404	21.6666	36.6757	30.3691	27.5646	28.4837	27.7979	28.5467	27.3266			31.4036	4.88179
9.7273	33.5056	27.275	30.1914	36.8404		24.6505	37.6968	27.2826	27.8106	34.8269	31.618	39.8284	30.3908		37.1388	28.0741		30.6331	37.9049	32.3727	27.5802	36.3639	23.5048	36.8725	30.4378	27.6274	28.4242	27.5178	27.9717	27.8481			31.1922	4.52788
9.8182	34.1387	27.7459	29.3491	25.9675		24.8496	36.7209	27.6823	27.5971	35.172	30.5526	39.1374	29.3495		36.7413	27.2474		30.2659	37.2497	32.7756	27.3793	36.471	24.1397	37.0279	29.3674	27.6943	27.993	27.4286	27.3199	27.6063			30.5544	4.38313
9.9091	34.7004	27.3663	30.0974	17.3811		24.4706	37.4132	27.3665	27.4868	36.5019	30.6717	38.9748	30.1063		36.5453	27.2414		30.3342	37.4052	33.3033	27.6566	35.7524	22.516	36.7417	28.4694	27.2857	27.3111	27.7029	27.0021	27.5			30.1965	5.20025
10	36.3269	27.3568	29.9412	12.4871		24.2848	36.2705	27.7956	27.7492	37.8232	31.9731	38.7173	29.837		37.2624	26.3527		29.9594	36.5713	35.1817	27.3434	35.8224	23.2251	36.5822	28.5028	27.9344	26.8271	27.3245	26.21	27.7752			30.1273	5.83627
10.0909	35.6407	27.5627	31.0625			25.0544	36.4293	28.2164	27.0754	39.3768	30.789	38.1652	31.0164		37.3957	26.6924		29.6211	36.958	36.7319	27.5468	36.6903	23.455	35.8324	27.8898	28.0451	26.391	27.554	26.3953	27.0683			30.9483	4.8386
10.1818	31.752	27.0173	30.033			25.1136	35.723	28.813	28.0679	38.4507	30.226	38.4834	30.2313		37.1036	25.5102		29.7437	36.6121	36.0577	27.1678	37.2857	23.2277	36.2491	27.3116	29.277	26.3233	27.0637	25.3709	28.1178			30.6282	4.72841
10.2727	25.1249	27.9913	29.7286			25.0764	35.1748	29.3849	27.8986	38.9395	30.3607	37.6269	29.8203		35.429	25.5234		29.1463	36.4425	33.5739	28.0689	35.9059	22.6644	35.6445	26.6358	30.9901	25.1442	28.1187	25.2972	27.9211			30.1397	4.5435
10.3636	18.1034	28.0821	29.6907			24.1761	36.4285	32.1459	29.4222	36.5392	30.6292	37.5126	29.7397		35.0247	25.2654		29.0815	37.0197	27.9483	28.3197	35.4556	22.735	35.3216	26.4033	33.986	25.5465	28.1476	24.8039	29.5535			29.8878	4.97912
10.4546	13.0391	29.1551	29.3112			24.8407	36.7436	34.4485	30.9283	36.6267	30.4127	37.8017	29.4737		35.4754	22.8798		28.7439	37.1533	20.4688	30.3355	34.1354	23.3554	36.2071	26.2103	35.1408	24.424	30.2838	22.0419	31.0101			29.6403	6.14473
10.5455	9.6477	30.672	29.9916			24.0264	36.2862	35.8821	34.195	36.593	29.4893	38.3917	30.1491		35.927	20.3387		30.0023	37.0307	14.3329	32.2423	34.8845	22.9391	36.7603	25.1831	36.6917	21.5836	31.936	19.7137	34.3814			29.5874	7.66076
10.6364	8.4793	33.7129	28.7189			23.8639	35.1189	36.0614	35.115	35.4696	30.7767	38.2439	28.6873		36.2577	17.9513		28.9814	35.2196	10.3357	34.3824	34.9386	22.4588	35.9348	25.6152	35.9711	19.205	34.3192	16.175	35.1691			29.1216	8.5519
10.7273		34.6932	29.1961			23.3712	34.6017	34.5906	36.6104	35.5057	29.9246	37.381	29.2047		37.5714			30.2327	34.9226	9.1088	35.3262	36.177	23.9482	35.0444	24.0738			35.1709	12.6518	36.7311			30.729	7.81047
10.8182		35.6341	30.3128			22.5137	34.4829	28.4697		35.8666	30.6757	35.5668	30.1647		36.8126			31.7411	35.3729	8.125	36.0765	35.8517	24.2111	33.7404	21.3044			36.2127	10.586	35.0673			29.9423	8.27173
10.9091		34.3385	30.0027			22.0417	34.2329			35.4395	32.4338	35.8642	30.0033		36.6832			31.9764	35.9032		31.334	36.3892	24.1665	34.5492	18.9439			31.7804		28.7841			31.3815	5.10624
11		28.1613	29.0667			22.0231	35.9201			35.1174	33.5246	36.5677	29.0799		39.4829			32.1375	36.0951		25.7212	35.6745	24.261	34.7804	14.9971			26.0918		23.485			30.1215	6.44435
11.0909		22.9375	28.8659			20.9903	35.5851			35.1387	33.2664	36.646	28.9407		39.2885			31.4258	37.4708		20.0197	38.3334	23.6565	35.4344	12.1195			20.3172					29.4374	8.05037
11.1818		18.4883	29.3556			20.6757	35.1511			36.2827	32.785	37.704	29.3111		39.5716			32.3059	36.4438		17.7738	38.3824	23.5708	35.9329	10.3229			17.8366					28.935	9.02792
11.2727			25.5637			19.4089	36.3046			36.7101	33.5583	38.1705	26.372		38.4121			33.1862	36.9145		16.4722	38.3924	22.7103	35.9402				16.5564					30.3115	8.27676
11.3636			19.0419			19.7174	36.7675			37.2924	34.0272	37.138	19.6916		40.4712			34.0176	39.2221			38.9521	22.9192	35.1826									31.8801	8.26763
11.4546			13.9128			19.7132	38.046			36.9368	34.9862	38.8925	14.3807		41.3551			35.2665	39.6683			39.0507	21.5103	38.2353									31.6888	10.248
11.5455			9.9827			18.5722	37.6532			34.956	37.057	39.9843	10.2778		42.6394			36.2168	39.3767			40.8306	20.7637	38.12									31.2639	11.8567
11.6364						18.5866	38.6933			35.2054	38.1838	40.0152	8.4329		39.1183			36.5774	38.0963			41.2368	21.1659	38.4625									32.8145	10.6095
11.7273						17.8132	38.9873			34.6126	39.5604	39.9657			33.6134			39.6843	40.5054			40.5892	20.7393	38.2237									34.9359	8.0995
11.8182						16.1275	40.0886			34.8248	40.5573	39.8727						40.3241	41.0919			34.4497	21.5614	39.0011									34.7899	8.81064
11.9091						14.4425	40.3608			34.7772	42.7454	41.8902						39.2981	42.6622			26.5386	21.946	40.4869									34.5148	10.0322
12						12.9502	41.489			34.7907	43.5138	43.3118						35.9312	38.8538				21.6244	41.3686									34.8704	10.6357
12.0909						11.1475	37.0286			33.5627	41.9192	42.4956						30.1575	33.4169				22.5165	39.6782									32.4359	10.147
12.1818						9.3777	28.3575			33.2484	37.8023							22.6633					22.7746	34.0634									26.8982	9.61423
12.2727
12.3636
12.4546
12.5455

## Sheet: Figure 3 supplement 2 B
	Glucose					Glycerol
cell number	CRIB intensity medial zone (U.R.)	Background intensity (U.R.9	CRIB-Background ratio (U.R.)	Normalized mean	cell number	CRIB intensity medial zone (U.R.)	Background intensity (U.R.9	CRIB-Background ratio (U.R.)	Normalized mean
1	99	81	18	0.740741	1	85	78	7	0.288066
2	108	106	2	0.0823045	2	84	78	6	0.246914
3	108	99	9	0.37037	3	78	59	19	0.781893
4	99	75	24	0.987654	4	78	63	15	0.617284
5	124	62	62	2.55144	5	55	52	3	0.123457
6	102	67	35	1.44033	6	65	52	13	0.534979
7	124	95	29	1.19342	7	57	48	9	0.37037
8	102	67	35	1.44033	8	60	52	8	0.329218
9	124	102	22	0.90535	9	85	82	3	0.123457
10	90	57	33	1.35802	10	78	57	21	0.864198
11	71	50	21	0.864198	11	78	60	18	0.740741
12	90	54	36	1.48148	12	60	55	5	0.205761
13	73	56	17	0.699588	13	60	52	8	0.329218
14	124	92	32	1.31687	14	71	53	18	0.740741
15	102	99	3	0.123457	15	60	52	8	0.329218
16	124	99	25	1.02881	16	83	78	5	0.205761
17	102	74	28	1.15226	17	78	70	8	0.329218
18	102	83	19	0.781893	18	78	53	25	1.02881
19	108	99	9	0.37037	19	78	57	21	0.864198
20	99	81	18	0.740741	20	57	48	9	0.37037
21	108	99	9	0.37037	21	63	52	11	0.452675
22	102	93	9	0.37037	22	60	52	8	0.329218
23	99	81	18	0.740741	23	66	53	13	0.534979
24	108	85	23	0.946502	24	62	55	7	0.288066
25	124	89	35	1.44033	25	60	54	6	0.246914
26	102	67	35	1.44033	26
27	124	81	43	1.76955	27
28	73	48	25	1.02881	28
29	90	53	37	1.52263	29
30	99	81	18	0.740741	30
		Ratio mean	24.3
			Mean	1				Mean	0.451029
			Std. Deviation	0.531876				Std. Deviation	0.254368

## Sheet: Figure 3 Supplement 2 C
	For3
	G2 cells										M cells
	Glucose					Glycerol					Glucose					Glycerol
cell number	For3 patch (U.R.)	Cytosol area (U.R.)	For3 patch/cytosol ratio (U.R.)	Normalized mean	cell number	For3 patch (U.R.)	Cytosol area (U.R.)	For3 patch/cytosol ratio (U.R.)	Normalized mean	cell number	For3 patch (U.R.)	Cytosol area (U.R.)	For3 patch/cytosol ratio (U.R.)	Normalized mean	cell number	For3 patch (U.R.)	Cytosol area (U.R.)	For3 patch/cytosol ratio (U.R.)	Normalized mean
1	11214	61244	0.183104	1.08721	1	15633	102572	0.15241	0.904957	1	19799	111589	0.177428	1.07558	1	17278	120935	0.14287	0.866092
2	15224	106106	0.143479	0.851929	2	16680	129991	0.128317	0.761899	2	18893	124644	0.151576	0.918866	2	21817	147108	0.148306	0.899045
3	22806	126116	0.180834	1.07373	3	10791	67107	0.160803	0.954791	3	20303	133515	0.152065	0.921834	3	15692	113981	0.137672	0.834581
4	21460	137629	0.155926	0.925837	4	18276	124371	0.146947	0.872523	4	21137	136212	0.155177	0.940698	4	16655	136275	0.122216	0.740885
5	15298	82348	0.185773	1.10305	5	10492	72332	0.145053	0.861276	5	17826	108822	0.163809	0.993024	5	8316	110375	0.0753431	0.456737
6	17210	108925	0.157999	0.938141	6	16481	101319	0.162664	0.965845	6	19038	105889	0.179792	1.08992	6	16613	136033	0.122125	0.740332
7	10527	57488	0.183116	1.08728	7	12518	94433	0.13256	0.787093	7	25302	142272	0.177842	1.0781	7	16687	134008	0.124522	0.754866
8	13998	79107	0.17695	1.05067	8	13302	113299	0.117406	0.697117	8	21208	136819	0.155008	0.939671	8	18623	150188	0.123998	0.751687
9	20186	124166	0.162573	0.9653	9	19032	111666	0.170437	1.01199	9	24021	161796	0.148465	0.900007	9	17762	153124	0.115997	0.703187
10	18629	128327	0.145168	0.861958	10	11524	106847	0.107855	0.640406	10	21805	125121	0.174271	1.05645	10	19160	103763	0.184652	1.11937
11	15843	92412	0.171439	1.01794	11	14623	123865	0.118056	0.700975	11	14167	66677	0.212472	1.28803	11	17303	148169	0.116779	0.707924
12	18704	103748	0.180283	1.07046	12	19813	110980	0.178528	1.06003	12	14078	74171	0.189805	1.15061	12	19641	105574	0.18604	1.12779
13	21712	126640	0.171447	1.01799	13	14344	107682	0.133207	0.790937	13	20545	143652	0.143019	0.866996	13	18058	129280	0.139681	0.846761
14	12895	70678	0.182447	1.08331	14	14299	117795	0.121389	0.720765	14	11408	71937	0.158583	0.961346	14	14179	107457	0.13195	0.799896
15	22659	142447	0.15907	0.9445	15	14675	83470	0.175812	1.04391	15	11408	71937	0.158583	0.961346	15	18664	157328	0.118631	0.719153
16	6900	51080	0.135082	0.802071	16	16384	140739	0.116414	0.691226	16	16372	105916	0.154575	0.93705	16	9837	111128	0.0885195	0.536614
17	9595	52398	0.183118	1.08729	17	19270	107861	0.178656	1.0608	17	12045	73241	0.164457	0.996954	17	17589	141714	0.124116	0.752404
18	17998	106105	0.169624	1.00717	18	17204	133814	0.128567	0.763383	18	13576	70361	0.192948	1.16967	18	17553	140595	0.124848	0.75684
19	14520	89390	0.162434	0.964478	19	25731	142981	0.179961	1.06855	19	24041	148128	0.162299	0.98387	19	17646	150649	0.117133	0.710072
20	19868	133760	0.148535	0.881947	20	10799	75692	0.14267	0.847126	20	19894	119495	0.166484	1.00924	20	19916	104661	0.190291	1.15356
21	25616	154840	0.165435	0.982297	21	15063	113488	0.132728	0.788091	21	11649	81727	0.142536	0.864063	21	15077	88851	0.169689	1.02867
22	13299	77760	0.171026	1.01549	22	12101	76725	0.157719	0.936481	22	23359	152264	0.153411	0.929993	22	20357	142155	0.143203	0.868109
23	15884	92297	0.172097	1.02185	23	15165	84426	0.179625	1.06655	23	18304	117262	0.156095	0.946261	23	20480	139358	0.14696	0.890883
24	13604	91061	0.149394	0.887052	24	15337	115850	0.132387	0.786066	24	13189	81021	0.162785	0.986817	24	20849	139020	0.149971	0.909139
25	17499	102093	0.171403	1.01773	25	18269	106378	0.171737	1.01971	25	17855	123059	0.145093	0.879567	25	18273	120869	0.15118	0.916468
26	22205	141789	0.156606	0.929871	26	20344	138938	0.146425	0.869421	26	16933	106003	0.159741	0.968363	26	17256	124955	0.138098	0.837161
27	22663	153911	0.147247	0.874304	27	17592	102536	0.171569	1.01872	27	16358	106285	0.153907	0.932998	27	18427	132114	0.139478	0.845529
28	23443	147436	0.159005	0.944114	28	14717	109424	0.134495	0.798585	28	18714	101534	0.184313	1.11732	28	19166	129695	0.147777	0.895841
29	17797	92452	0.1925	1.143	29	19108	140840	0.135672	0.805571	29	21439	125295	0.171108	1.03727	29	17665	139871	0.126295	0.765611
30	15110	94485	0.15992	0.949547	30	27471	153953	0.178438	1.0595	30	17526	115169	0.152176	0.922507	30	24021	165129	0.145468	0.881841
31	21230	138148	0.153676	0.912473	31	23705	161377	0.146892	0.872194	31	14115	66451	0.212412	1.28766	31	16221	139071	0.116638	0.707072
32	17383	95724	0.181595	1.07825	32	18680	116226	0.160721	0.954307	32	14350	75554	0.18993	1.15138	32	19387	108297	0.179017	1.08522
33	19849	109810	0.180758	1.07328	33	15563	103721	0.150047	0.890925	33	10129	73549	0.137718	0.834857	33	17089	119878	0.142553	0.864171
34	24243	123899	0.195667	1.1618	34	18346	110141	0.166568	0.989024	34	11211	71219	0.157416	0.954269	34	17070	121756	0.140198	0.849896
35	20120	102202	0.196865	1.16892	35	17793	112769	0.157783	0.936859	35	14394	95240	0.151134	0.916188	35	16997	136062	0.124921	0.757282
36	14719	85870	0.17141	1.01777	36	10439	63339	0.164812	0.978594	36	11760	69131	0.170112	1.03123	36	14893	88481	0.168319	1.02036
		Ratio mean	0.168417									Ratio mean	0.16496
			Mean	1				Mean	0.888228				Mean	1				Mean	0.83614
			Std. Deviation	0.0922964				Std. Deviation	0.125885				Std. Deviation	0.109939				Std. Deviation	0.151033

## Sheet: Figure 3 supplement 2 D
	Wild type Glucose (not shown in figure)					Wild type					rlc1(S35A)					for3DAD					for3DAD rlc1(S35A)
cell number	Calbe area (U.R.)	Patch area (U.R.)	Cable to patch ratio (U.R.)	Normalized mean	cell number	Calbe area (U.R.)	Patch area (U.R.)	Cable to patch ratio (U.R.)	Normalized mean	cell number	Calbe area (U.R.)	Patch area (U.R.)	Cable to patch ratio (U.R.)	Normalized mean	cell number	Calbe area (U.R.)	Patch area (U.R.)	Cable to patch ratio (U.R.)	Normalized mean	cell number	Calbe area (U.R.)	Patch area (U.R.)	Cable to patch ratio (U.R.)	Normalized mean
1	18126	28429	0.637588	0.984626	1	18788	40277	0.46647	0.720368	1	19657	34823	0.564483	0.87173	1	24790	31622	0.783948	1.21065	1	17612	27885	0.631594	0.975369
2	17540	27328	0.641833	0.991181	2	22650	45936	0.493077	0.761458	2	16886	39665	0.425715	0.657431	2	14161	19841	0.713724	1.1022	2	26338	37887	0.695172	1.07355
3	15339	20675	0.741911	1.14573	3	25192	47451	0.530906	0.819876	3	17396	39777	0.437338	0.67538	3	19398	32158	0.603209	0.931535	3	13975	20345	0.686901	1.06078
4	13406	20233	0.662581	1.02322	4	15653	37159	0.421244	0.650526	4	18770	40459	0.463926	0.716441	4	23669	27660	0.855712	1.32147	4	18797	24535	0.76613	1.18313
5	21529	35911	0.59951	0.925822	5	14041	35441	0.39618	0.611819	5	33086	50385	0.656664	1.01408	5	13006	19419	0.669756	1.0343	5	17138	27886	0.614574	0.949085
6	20809	31863	0.653077	1.00855	6	51624	76137	0.678041	1.0471	6	18669	42204	0.442351	0.683122	6	17115	22760	0.751977	1.16128	6	22591	37605	0.600745	0.927728
7	20160	25455	0.791986	1.22306	7	49531	76048	0.651312	1.00582	7	17307	43179	0.40082	0.618985	7	17295	28976	0.596873	0.92175	7	16032	25021	0.640742	0.989496
8	22728	33668	0.675062	1.0425	8	52086	80359	0.648166	1.00096	8	22866	49380	0.463062	0.715106	8	17775	32067	0.554308	0.856017	8	18140	26839	0.675882	1.04376
9	21775	31464	0.692061	1.06875	9	15744	37385	0.421131	0.650352	9	30831	51658	0.596829	0.921682	9	19625	26606	0.737616	1.1391	9	25865	35000	0.739	1.14124
10	24687	40000	0.617175	0.953102	10	14832	36260	0.409046	0.631688	10	26000	47283	0.549881	0.849179	10	20153	26738	0.753721	1.16397	10	21530	28644	0.751641	1.16076
11	18364	24971	0.735413	1.1357	11	20022	43987	0.45518	0.702933	11	20536	42921	0.47846	0.738885	11	21065	24474	0.860709	1.32919	11	22477	35820	0.627499	0.969045
12	26193	37189	0.704321	1.08768	12	18587	40548	0.458395	0.707898	12	25549	47185	0.541464	0.836182	12	18873	24743	0.762761	1.17793	12	14013	27818	0.503739	0.777922
13	20264	46123	0.439347	0.678483	13	18475	39493	0.467804	0.722429	13	22456	36933	0.60802	0.938964	13	16507	22827	0.723135	1.11674	13	17124	20448	0.837441	1.29326
14	17505	27273	0.641844	0.991198	14	51984	79235	0.656074	1.01317	14	21591	45922	0.470167	0.726078	14	20167	27757	0.726555	1.12202	14	19733	28415	0.694457	1.07245
15	24562	39798	0.617167	0.953089	15	51530	85314	0.604004	0.932762	15	31582	49004	0.644478	0.995266	15	21560	32188	0.669815	1.03439	15	14093	26009	0.541851	0.836779
16	21491	30340	0.708339	1.09389	16	51591	78325	0.658679	1.0172	16	20608	41466	0.496985	0.767494	16	19377	23355	0.829672	1.28126	16	22803	37786	0.603477	0.931949
17	12929	25407	0.508876	0.785855	17	22635	46453	0.487267	0.752485	17	25902	47067	0.550322	0.849861	17	18873	22827	0.826784	1.2768	17	20536	30924	0.66408	1.02554
18	18135	28969	0.626014	0.966752	18	25908	46897	0.552445	0.853139	18	18239	40241	0.453244	0.699944	18	20875	23269	0.897116	1.38541	18	20817	39926	0.52139	0.805181
19	18777	25970	0.723027	1.11657	19	60218	88074	0.683721	1.05587	19	22704	42806	0.530393	0.819085	19	17091	23355	0.731792	1.1301	19	15847	23523	0.673681	1.04036
20	18363	30653	0.59906	0.925128	20	19173	42014	0.456348	0.704737	20	23063	42125	0.54749	0.845487	20	21153	32693	0.647019	0.99919	20	26395	39463	0.668854	1.03291
21	16434	23532	0.698368	1.07849	21	19127	42206	0.453182	0.699848	21	22121	44348	0.498805	0.770303	21	14516	17669	0.821552	1.26872	21	24638	35441	0.695184	1.07357
22	21766	33801	0.643945	0.994443	22	18234	39068	0.466725	0.720762	22	29325	46989	0.624082	0.963769	22	21221	35180	0.603212	0.931539	22	15471	24914	0.620976	0.958972
23	14173	22331	0.634678	0.980132	23	52242	83217	0.62778	0.96948	23	28210	50672	0.556718	0.859738	23	12419	19367	0.641245	0.990274	23	23231	31517	0.737094	1.13829
24	18038	22775	0.792009	1.2231	24	23879	44916	0.531637	0.821006	24	19098	41465	0.460581	0.711275	24	19067	26305	0.724843	1.11937	24	23214	30077	0.771819	1.19192
25	18625	23618	0.788593	1.21782	25	12086	33250	0.363489	0.561335	25	27132	49423	0.548975	0.847781	25	19469	31262	0.622769	0.961741	25	22733	28349	0.801898	1.23837
26	15966	32667	0.48875	0.754776	26	42574	69774	0.61017	0.942284	26	51919	80677	0.643542	0.99382	26	57804	61199	0.944525	1.45863	26	62657	67895	0.922851	1.42516
27	21782	33936	0.641855	0.991216	27	22454	46993	0.477816	0.73789	27	55580	90851	0.611771	0.944756	27	56928	71130	0.800337	1.23596	27	62275	65863	0.945523	1.46017
28	21287	34975	0.608635	0.939913	28	16292	38483	0.423356	0.653787	28	51057	77450	0.659225	1.01804	28	51032	53568	0.952658	1.47119	28	65532	75507	0.867893	1.34029
29	16037	25275	0.6345	0.979858	29	52731	79722	0.661436	1.02145	29	67004	80113	0.836369	1.2916	29	57614	72234	0.797602	1.23174	29	58561	62492	0.937096	1.44716
30	19143	28152	0.679987	1.0501	30	22124	45266	0.488755	0.754784	30	60323	73712	0.818361	1.26379	30	56655	64450	0.879054	1.35752	30	54523	57080	0.955203	1.47512
31	15884	30708	0.517259	0.798802	31	51306	75783	0.677012	1.04551	31	59513	78419	0.75891	1.17198	31	57558	63670	0.904005	1.39605	31	53713	67988	0.790036	1.22005
32	17279	27468	0.629059	0.971455	32	17858	41463	0.430697	0.665125	32	53662	83812	0.640266	0.988762	32	47740	60698	0.786517	1.21462	32	60519	76824	0.787762	1.21654
33	16940	27809	0.609155	0.940717	33	19576	42373	0.461992	0.713454	33	48741	71934	0.677579	1.04638	33	54649	69319	0.78837	1.21748	33	52331	64623	0.809789	1.25056
34	18841	37937	0.496639	0.766959	34	17357	39000	0.445051	0.687292	34	47217	84677	0.557613	0.861121	34	53775	72858	0.73808	1.13981	34	55597	66100	0.841104	1.29892
35	18741	27725	0.67596	1.04388	35	49512	82229	0.602123	0.929858	35	53851	84700	0.635785	0.981842	35	58008	65036	0.891937	1.37742	35	65380	72573	0.900886	1.39124
36	14310	22792	0.627852	0.96959	36	48312	78062	0.618893	0.955755	36	18054	44179	0.408656	0.631086	36	57163	62760	0.910819	1.40658	36	66851	70228	0.951914	1.47004
37	20987	33488	0.626702	0.967815	37	51504	82785	0.622142	0.960772	37	23293	49827	0.467477	0.721924	37	19253	27561	0.69856	1.07878	37	77100	79886	0.965125	1.49044
38	20964	26469	0.792021	1.22312	38	20698	41652	0.496927	0.767403	38	21635	43493	0.497436	0.76819	38	18468	25560	0.722535	1.11581	38	63710	73620	0.86539	1.33642
39	15634	24900	0.627871	0.96962	39	29582	55354	0.534415	0.825296	39	20979	43416	0.483209	0.746218	39	57255	66526	0.860641	1.32909	39	51338	64756	0.792791	1.22431
40	19185	29377	0.653062	1.00852	40	55504	80981	0.685395	1.05845	40	27298	49054	0.556489	0.859384	40	56367	64150	0.878675	1.35694	40	62440	69688	0.895994	1.38368
41	18217	27345	0.666191	1.0288	41	20905	41110	0.508514	0.785297	41	27229	49793	0.546844	0.84449	41	18865	29700	0.635185	0.980915	41	23306	35666	0.653451	1.00912
		Ratio mean	0.647544
			Mean	1				Mean	0.820474				Mean	0.859186				Mean	1.17891				Mean	1.15441
			Std. Deviation	0.124301				Std. Deviation	0.150996				Std. Deviation	0.162084				Std. Deviation	0.15988				Std. Deviation	0.198747
