# Supplementary material for: Myosin II regulatory light chain phosphorylation and formin availability modulate cytokinesis upon changes in carbohydrate metabolism
Source: eLife journal article supplement (doi:10.7554/elife.83285), 2023-02-24
Supplement: supp [file Figure 4 source data.xlsx]

## Sheet: Figure 4A
		Replicate 1					Replicate 2					Replicate 3
		For3 intensity	cdc2 intensity	ratio For3/cdc2	mean		For3 intensity	cdc2 intensity	ratio For3/cdc2	mean		For3 intensity	cdc2 intensity	ratio For3/cdc2	mean		Mean	Std. Deviation
Wild type glucose		9.99	11.092	0.900649	1		12.441	12.036	1.03365	1.14767		9.539	10.063	0.947928	0.950124		1.0326	0.0775792
Wild type glycerol		3.385	12.62	0.268225	0.297813		6.095	11.502	0.529908	0.588362		3.535	11.306	0.312666	0.347156		0.41111	0.146443
rlc1S35A glucose		9.224	10.513	0.87739	0.974175		14.149	12.211	1.15871	1.28653		9.903	11.244	0.880736	0.977891		1.07953	0.158908
rlc1S35A glycerol		3.524	11.615	0.303401	0.336869		5.304	11.004	0.482007	0.535177		4.209	11.244	0.374333	0.415626		0.429224	0.0992316
wis1D glucose		20.19	12.616	1.60035	1.77688		19.834	13.027	1.52253	1.69048		20.611	10.386	1.9845	2.20341		1.89026	0.100191
wis1D glycerol		13.781	13.078	1.05375	1.16999		12.294	12.417	0.990094	1.09931		18.175	11.352	1.60104	1.77765		1.34899	0.128693
wis1D rlc1S35A glucose		21.342	13.497	1.58124	1.75567		21.31	12.998	1.63948	1.82033		21.19	11.369	1.86384	2.06944		1.88181	0.0630802
wis1D rlc1S35A glycerol		14.563	12.969	1.12291	1.24678		8.573	7.754	1.10562	1.22758		14.84	11.8	1.25763	1.39636		1.29024	0.0321012

## Sheet: Figure 4C
	Ring assembly and contraction						Node condensation and ring maturation						Ring constriction and disassembly						Ring constriction rate (µm/min)
cell number	WT	rlc1(S35A)	wis1Δ	wis1Δ rlc1(S35A)		cell number	WT	rlc1(S35A)	wis1Δ	wis1Δ rlc1(S35A)		cell number	WT	rlc1(S35A)	wis1Δ	wis1Δ rlc1(S35A)		cell number	WT	rlc1(S35A)	wis1Δ	wis1Δ rlc1(S35A)
1	45	50	45	50		1	20	20	20	20		1	15	20	15	15		1	0.455232	0.412957	0.51692	0.477535
2	45	50	45	50		2	20	20	20	20		2	15	20	15	15		2	0.503271	0.410287	0.46748	0.475695
3	45	50	45	50		3	20	20	20	20		3	15	20	15	15		3	0.45015	0.436485	0.46884	0.472037
4	45	50	45	50		4	20	25	20	20		4	15	25	15	20		4	0.489656	0.406496	0.49618	0.455638
5	45	50	45	50		5	20	25	20	25		5	15	25	15	20		5	0.472948	0.419584	0.4911	0.493829
6	45	50	50	50		6	20	25	20	25		6	15	25	20	20		6	0.458703	0.405722	0.48775	0.477804
7	45	55	50	50		7	20	25	20	25		7	15	25	20	20		7	0.517004	0.403081	0.51899	0.51142
8	45	55	50	50		8	20	25	20	25		8	15	25	20	20		8	0.474941	0.377637	0.46805	0.481197
9	45	55	50	50		9	20	25	20	25		9	15	25	20	20		9	0.493825	0.387808	0.49969	0.486169
10	45	55	50	50		10	20	25	20	25		10	15	30	20	20		10	0.473857	0.399277	0.45182	0.494141
11	45	55	50	50		11	25	25	20	25		11	15	30	20	20		11	0.468328	0.400721	0.47512	0.507088
12	45	60	50	50		12	25	30	25	25		12	15	30	20	20		12	0.509184	0.418804	0.4868	0.469439
13	45	60	50	50		13	25	30	25	25		13	15	30	20	20		13	0.495995	0.403768	0.47994	0.460348
14	45	60	50	50		14	25	30	25	25		14	20	30	20	20		14	0.508037	0.424141	0.507	0.498173
15	45	60	50	50		15	25	30	25	25		15	20	30	20	20		15	0.475762	0.402733	0.47555	0.467731
16	45	60	50	50		16	25	30	25	25		16	20	30	20	20		16	0.46232	0.414915	0.45474	0.459982
17	45	60	50	50		17	25	30	25	25		17	20	30	20	20		17	0.459087	0.41444	0.48644	0.475208
18	45	60	50	50		18	25	30	25	25		18	20	30	20	20		18	0.496587	0.435321	0.51249	0.466298
19	45	60	50	50		19	25	30	25	25		19	20	30	20	20		19	0.519358	0.41679	0.47091	0.50081
20	45	60	50	50		20	25	30	25	25		20	20	30	20	20		20	0.465399	0.394441	0.50267	0.47091
21	45	60	50	50		21	25	30	25	25		21	20	30	20	20		21	0.502594	0.383909	0.51322	0.494517
22	45	60	50	50		22	25	30	25	25		22	20	30	20	20		22	0.492714	0.395885	0.45699	0.474441
23	50	60	50	50		23	25	30	25	25		23	20	30	20	20		23	0.460771	0.416	0.49512	0.502649
24	50	65	50	50		24	25	30	25	25		24	20	30	20	20		24	0.507892	0.404908	0.50013	0.480096
25	50	65	50	50		25	25	30	25	25		25	20	30	20	20		25	0.473842	0.398191	0.5124	0.470977
26	50	65	50	50		26	25	30	25	25		26	20	30	20	20		26	0.473489	0.434319	0.46187	0.457447
27	50	65	50	50		27	25	30	25	25		27	20	30	20	20		27	0.498299	0.387999	0.45977	0.478407
28	50	65	50	50		28	25	30	25	25		28	20	30	20	20		28	0.465349	0.404352	0.45379	0.459092
29	50	65	50	50		29	25	30	25	25		29	20	35	20	20		29	0.489901	0.41014	0.47094	0.479328
30	50	65	50	50		30	25	35	25	25		30	20	35	20	20		30	0.515851	0.407422	0.51922	0.507288
31	50	65	50	50		31	25	35	25	25		31	20	35	20	20		31	0.495596	0.378333	0.48112	0.484488
32	50	65	50	50		32	25	35	25	25		32	20	35	20	20
33	50	65	50	50		33	25	35	25	25		33	20	45	20	20			WT	rlc1(S35A)	wis1Δ	wis1Δ rlc1(S35A)
34	50	65	55	50		34	25	35	25	25		34	20	45	25	20			0.4847	0.4067	0.4853	0.4803	Mean
35	50	70	55	55		35	25	35	25	25		35	20	45	25	20			0.0204	0.01508	0.02128	0.0158	Std. Deviation
36	50	70	55	55		36	25	35	25	25		36	20	45	25	20			pvalue	<0,0001	0.5488	0.1687
37	50	70	55	55		37	25	35	25	25		37	20	45	25	20			Significant differences?	****	ns	ns
38	50	75	55	55		38	25	35	25	25		38	20	45	25	20
39	50		55	55		39	25		25	25		39	20		25	20
40	50		55	55		40	25		25	25		40	20		25	20
41	50		55	55		41	25		25	25		41	20		25	20
42	50		55	55		42	25		25	25		42	20		25	25
43	50		55	55		43	25		25	25		43	20		25	25
44	50		55	55		44	25		30	30		44	20		25	25
45	50		55	55		45	25		30	30		45	20		25	25
46	50		55	55		46	30		30	30		46	20		25	25
47	50		55	55		47	30		30	30		47	20		25	25
48	50		55	55		48	30		30	30		48	20		25	25
49	50		55	55		49	30		30	30		49	20		25	25
50	50		55	55		50	30		30	30		50	20		25	25
51	50		55	55		51	30		30	30		51	20		25	25
52	50		55	55		52	30		30	30		52	20		25	25
53	50		55	55		53	30		30	30		53	20		25	25
54	50			55		54	30			30		54	25			25
55	50			55		55	30			30		55	25			25
56	50			55		56	30			30		56	25			25
57	50			55		57	30			30		57	25			25
58	50			55		58	30			30		58	25			25
59	50			55		59	30			30		59	25			25
60	50			55		60	30			30		60	25			25
61	50			55		61	30			30		61	25			25
62	50			55		62	30			30		62	25			25
63	50			55		63	30			30		63	25			25
64	50			55		64	30			30		64	25			25
65	50					65	30					65	25
66	50					66	30					66	25
67	55					67	30					67	25
68	55					68	30					68	25
69	55					69	30					69	25
70	55					70	30					70	25
71	55					71	30					71	25
72	55					72	30					72	25
73	60					73	30					73	25
74	60					74	30					74	25
75	60					75	30					75	25
76	60					76	30					76	25
77	60					77	30					77	25
78	60					78	30					78	25
79	60					79	30					79	25
80	60					80	30					80	25
81	60					81	30					81	25
82	60					82	30					82	25
83	60					83	30					83	25
	WT	rlc1(S35A)	wis1Δ	wis1Δ rlc1(S35A)			WT	rlc1(S35A)	wis1Δ	wis1Δ rlc1(S35A)			WT	rlc1(S35A)	wis1Δ	wis1Δ rlc1(S35A)
	50.36	60.39	51.42	52.34	Mean		26.69	29.34	24.91	26.33	Mean		21.02	31.32	21.42	21.56	Mean
	4.671	6.408	3.159	2.515	Std. Deviation		3.428	4.376	3.176	2.851	Std. Deviation		3.471	7.041	3.159	2.8	Std. Deviation
	pvalue		0.1511	<0,0001			pvalue		0.25786	<0,0001			pvalue		0.564	<0,0001
	Significant differences?		ns	****			Significant differences?		ns	****			Significant differences?		ns	****
	pvalue			0.0793			pvalue			0.1525			pvalue			0.4574
	Significant differences?			ns			Significant differences?			ns			Significant differences?			ns

## Sheet: Figure 4F
	Ring assembly and contraction						Ring constriction rate (µm/min)
cell number	WT	rlc1(S35A)	pyp1Δ	pyp1Δ rlc1(S35A)		cell number	WT	rlc1(S35A)	pyp1Δ	pyp1Δ rlc1(S35A)
1	42.5	42.5	42.5	47.5		1	0.609142	0.58287	0.523429	0.537946
2	42.5	42.5	42.5	47.5		2	0.573451	0.55955	0.566351	0.548131
3	42.5	42.5	42.5	47.5		3	0.610035	0.549282	0.557556	0.512256
4	42.5	42.5	42.5	47.5		4	0.585853	0.541845	0.539008	0.526507
5	42.5	42.5	42.5	50		5	0.585513	0.571259	0.524553	0.504125
6	42.5	42.5	42.5	50		6	0.603039	0.569107	0.547957	0.503496
7	42.5	42.5	42.5	50		7	0.592429	0.548343	0.572435	0.528697
8	42.5	42.5	42.5	50		8	0.557105	0.544877	0.569241	0.511972
9	42.5	42.5	42.5	50		9	0.552976	0.591176	0.580054	0.544219
10	42.5	45	42.5	50		10	0.598649	0.566224	0.543744	0.55072
11	42.5	45	42.5	50		11	0.592183	0.537609	0.571254	0.567266
12	42.5	45	42.5	52.5		12	0.552872	0.530315	0.535674	0.506767
13	42.5	45	42.5	52.5		13	0.60682	0.583334	0.528127	0.525129
14	42.5	45	42.5	52.5		14	0.597661	0.53761	0.579978	0.529616
15	42.5	45	42.5	55		15	0.56869	0.544029	0.526507	0.537768
16	42.5	45	45	55		16	0.589049	0.584077	0.55861	0.502931
17	42.5	45	45	55		17	0.555276	0.539065	0.553606	0.515482
18	42.5	45	45	55		18	0.566435	0.581397	0.561199	0.53293
19	42.5	45	45	55		19	0.550485	0.543722	0.540804	0.540847
20	42.5	45	45	55		20	0.557245	0.558797	0.53609	0.544084
21	42.5	45	45	55		21	0.60859	0.551365	0.570467	0.518625
22	42.5	45	45	55		22	0.607296	0.571224	0.549425	0.52882
23	42.5	45	45	55		23	0.57714	0.578843	0.559576	0.502899
24	42.5	45	45	55		24	0.613644	0.544901	0.572218	0.529941
25	42.5	45	45	55		25	0.580699	0.556269	0.54295	0.563509
26	42.5	45	45	55		26	0.563355	0.558935	0.588811	0.522617
27	42.5	45	45	55		27	0.613754	0.556714	0.570761	0.527293
28	42.5	45	45	55		28	0.584263	0.586606	0.560661	0.540238
29	42.5	45	45	55		29	0.564886	0.556846	0.530807	0.564901
30	42.5	45	47.5	55		30	0.573594	0.540729	0.527052	0.516051
31	42.5	45	47.5	57.5		31	0.554426	0.555944	0.522365	0.553037
32	42.5	45	47.5	57.5
33	42.5	45	47.5	57.5
34	45	45	47.5	60			WT	rlc1(S35A)	pyp1Δ	pyp1Δ rlc1(S35A)
35	45	45	47.5	60			43.08	44.52	45.21	54.57	Mean
36	45	45	47.5	60			1.069	1.137	2.116	4.29	Std. Deviation
37	45	45	47.5	60			pvalue	<0,0001	<0,0001	<0,0001
38	45	45	47.5	60			Significant differences?	****	****	****
39	45	45	47.5	60			pvalue		0.2572	<0,0001
40	45	45	47.5	62.5			Significant differences?		ns	****
41	45	45	47.5	65
42	45	47.5	47.5
43	45		47.5
44			47.5
45			47.5
46			47.5
47			47.5
48			47.5
	WT	rlc1(S35A)	pyp1Δ	pyp1Δ rlc1(S35A)
	43.08	44.52	45.21	54.57	Mean
	1.069	1.137	2.116	4.29	Std. Deviation
	pvalue	0.031	0.001	<0,0001
	Significant differences?	*	***	****
	pvalue		0.1475	<0,0001
	Significant differences?		ns	****
