# Supplementary material for: Myosin II regulatory light chain phosphorylation and formin availability modulate cytokinesis upon changes in carbohydrate metabolism
Source: eLife journal article supplement (doi:10.7554/elife.83285), 2023-02-24
Supplement: supp [file Figure 4 Supplement source data.xlsx]

## Sheet: Figure 4 Supplement A
	Wild type Glucose (not shown in figure)					Wild type					rlc1(S35A)					wis1Δ					wis1Δ rlc1(S35A)
cell number	Calbe area (U.R.)	Patch area (U.R.)	Cable to patch ratio (U.R.)	Normalized mean	cell number	Calbe area (U.R.)	Patch area (U.R.)	Cable to patch ratio (U.R.)	Normalized mean	cell number	Calbe area (U.R.)	Patch area (U.R.)	Cable to patch ratio (U.R.)	Normalized mean	cell number	Calbe area (U.R.)	Patch area (U.R.)	Cable to patch ratio (U.R.)	Normalized mean	cell number	Calbe area (U.R.)	Patch area (U.R.)	Cable to patch ratio (U.R.)	Normalized mean
1	21241	34704	0.612062	0.878744	1	13625	37300	0.365282	0.524438	1	18121	38334	0.472714	0.67868	1	17874	24521	0.728926	1.04653	1	15344	15838	0.968809	1.39093
2	10507	16135	0.651193	0.934925	2	19383	40903	0.473877	0.68035	2	20017	45217	0.442687	0.635571	2	16860	18273	0.922673	1.32469	2	14357	15629	0.918613	1.31886
3	18234	23415	0.778732	1.11803	3	23783	44319	0.536632	0.770448	3	23438	47985	0.488444	0.701265	3	11150	15364	0.725722	1.04193	3	15298	15712	0.973651	1.39788
4	15600	19326	0.807203	1.15891	4	12473	33930	0.36761	0.527781	4	19442	45043	0.431632	0.619698	4	9205	10240	0.898926	1.2906	4	48109	53657	0.896602	1.28726
5	18916	27558	0.686407	0.985481	5	42998	70989	0.605699	0.869609	5	26828	47644	0.563093	0.808438	5	15722	21268	0.739233	1.06132	5	12838	16811	0.763667	1.0964
6	18601	33301	0.558572	0.801947	6	19959	40824	0.488904	0.701924	6	16987	39433	0.430781	0.618477	6	12708	14833	0.856738	1.23003	6	16985	20012	0.848741	1.21855
7	15651	21866	0.715769	1.02764	7	14078	35553	0.395972	0.568501	7	19383	42055	0.460896	0.661714	7	17582	19606	0.896766	1.2875	7	16744	24589	0.680955	0.977654
8	17046	21118	0.807179	1.15887	8	21218	44316	0.478789	0.687402	8	23174	42920	0.539935	0.77519	8	12559	12800	0.981172	1.40868	8	7666	7710	0.994293	1.42752
9	14671	20336	0.72143	1.03576	9	14491	38439	0.376987	0.541244	9	30467	54010	0.564099	0.809883	9	13473	14507	0.928724	1.33338	9	35056	38358	0.913916	1.31212
10	18280	23473	0.778767	1.11808	10	18009	35355	0.509376	0.731317	10	23421	42791	0.547335	0.785814	10	14477	18792	0.770381	1.10604	10	49704	63642	0.780994	1.12128
11	18411	22566	0.815873	1.17136	11	20444	43664	0.468212	0.672216	11	31286	42834	0.730401	1.04864	11	13723	15369	0.892901	1.28195	11	16752	18388	0.911029	1.30797
12	13321	23248	0.572996	0.822656	12	23752	47404	0.501055	0.719369	12	26989	45810	0.589151	0.84585	12	13487	14641	0.92118	1.32255	12	16619	25447	0.653083	0.937638
13	16607	28125	0.590471	0.847745	13	27672	49882	0.554749	0.796459	13	20844	45672	0.456385	0.655236	13	20715	25252	0.820331	1.17776	13	14047	15271	0.919848	1.32064
14	11993	17632	0.680184	0.976547	14	29145	45202	0.644772	0.925706	14	22907	46289	0.494869	0.710489	14	16207	17808	0.910097	1.30664	14	18297	19190	0.953465	1.3689
15	17082	32258	0.529543	0.76027	15	19196	35084	0.547144	0.78554	15	16813	36986	0.454577	0.652641	15	13800	13739	1.00444	1.44208	15	16654	23662	0.703829	1.01049
16	11705	16528	0.708192	1.01676	16	50521	74425	0.678818	0.974585	16	27051	47104	0.574282	0.824503	16	13649	15027	0.908298	1.30405	16	15679	21449	0.73099	1.04949
17	16023	21831	0.733956	1.05375	17	58341	85157	0.685099	0.983604	17	24084	51170	0.470666	0.675741	17	14631	17277	0.846848	1.21583	17	14900	17920	0.831473	1.19375
18	11930	15433	0.773019	1.10983	18	21016	42625	0.493044	0.707868	18	28396	49124	0.578047	0.829909	18	15028	18945	0.793244	1.13887	18	53527	54859	0.97572	1.40085
19	11200	15525	0.721417	1.03575	19	17530	33783	0.5189	0.74499	19	29777	53604	0.5555	0.797536	19	15293	20915	0.731198	1.04979	19	15271	17920	0.852176	1.22348
20	15449	19139	0.8072	1.15891	20	18331	30864	0.593928	0.852709	20	27032	47147	0.573356	0.823173	20	6986	9297	0.751425	1.07883	20	53286	64933	0.82063	1.17819
21	10767	16623	0.647717	0.929934	21	23118	49640	0.465713	0.668629	21	20517	45990	0.446119	0.640497	21	17647	18877	0.934841	1.34216	21	49174	50640	0.971051	1.39415
22	15366	19732	0.778735	1.11804	22	21512	42442	0.506856	0.727699	22	21951	46445	0.472624	0.67855	22	9068	10154	0.893047	1.28216	22	54051	57248	0.944155	1.35553
23	11926	18001	0.662519	0.951185	23	62995	91673	0.687171	0.986578	23	31223	43640	0.715467	1.0272	23	13288	14521	0.915088	1.3138	23	53691	62321	0.861523	1.2369
24	11864	14879	0.797365	1.14479	24	19154	43575	0.439564	0.631087	24	29113	48998	0.594167	0.853052	24	17710	23353	0.758361	1.08879	24	51692	53796	0.960889	1.37956
25	16703	24099	0.693099	0.99509	25	13786	35396	0.389479	0.559179	25	27131	48660	0.557563	0.800498	25	12984	18534	0.70055	1.00579	25	16383	16711	0.980372	1.40753
26	20681	34652	0.59682	0.85686	26	22558	44403	0.508029	0.729382	26	15510	36084	0.42983	0.617112	26	16082	16063	1.00118	1.43741	26	20266	23220	0.872782	1.25306
27	11481	16355	0.701987	1.00785	27	56288	85459	0.658655	0.945638	27	29153	53204	0.547948	0.786694	27	13463	14364	0.937274	1.34565	27	15639	22099	0.707679	1.01602
28	9456	18436	0.51291	0.736389	28	21465	43171	0.497209	0.713848	28	34976	55291	0.63258	0.908202	28	17090	22363	0.764209	1.09718	28	10856	11844	0.916582	1.31595
29	9460	12260	0.771615	1.10782	29	21472	37069	0.579244	0.831627	29	31893	56836	0.561141	0.805636	29	16937	21815	0.776392	1.11467	29	13819	15119	0.914015	1.31226
30	16751	25135	0.666441	0.956817	30	16498	38778	0.425447	0.610819	30	19656	45328	0.433639	0.62258	30	17405	22133	0.786382	1.12902	30	17109	18100	0.945249	1.3571
31	12367	18276	0.67668	0.971516	31	29813	46993	0.634414	0.910834	31	22453	45686	0.491463	0.705599	31	13008	14216	0.915025	1.31371	31	15407	21400	0.719953	1.03364
32	9735	13746	0.708206	1.01678	32	20131	39157	0.51411	0.738113	32	23365	49571	0.471344	0.676714	32	15132	16290	0.928913	1.33365	32	16779	29525	0.568298	0.815911
33	13219	20299	0.651214	0.934955	33	55211	78431	0.703944	1.01066	33	16201	36157	0.448074	0.643304	33	16674	18547	0.899013	1.29072	33	17227	24486	0.703545	1.01009
34	17922	24928	0.718951	1.0322	34	58677	83999	0.698544	1.00291	34	49680	74256	0.669037	0.960543	34	7371	10101	0.72973	1.04768	34	19041	19316	0.985763	1.41527
35	11050	15316	0.721468	1.03582	35	20183	42206	0.478202	0.68656	35	61585	88156	0.698591	1.00297	35	13036	15688	0.830954	1.19301	35	9064	10584	0.856387	1.22952
36	9624	14779	0.651194	0.934926	36	23555	49028	0.48044	0.689772	36	50509	74598	0.677082	0.972094	36	13730	14568	0.942477	1.35312	36	13767	14794	0.93058	1.33604
37	17462	22423	0.778754	1.11807	37	27476	53192	0.516544	0.741607	37	48301	91562	0.527522	0.757369	37	12694	13182	0.96298	1.38256	37	52775	63241	0.834506	1.19811
38	10374	14663	0.707495	1.01576	38	55244	90922	0.607598	0.872334	38	70075	81087	0.864195	1.24073	38	14365	19102	0.752015	1.07968	38	54516	70256	0.775962	1.11406
39	14651	24812	0.59048	0.847759	39	20703	41275	0.501587	0.720133	39	68125	83731	0.813617	1.16812	39	14876	19344	0.769024	1.1041	39	51927	59485	0.872943	1.25329
40	12458	15997	0.778771	1.11809	40	54950	81486	0.674349	0.96817	40	51714	74032	0.698536	1.00289	40	16030	22307	0.718609	1.03171	40	52772	55511	0.950658	1.36487
41	12577	18104	0.694708	0.9974	41	22442	36669	0.612016	0.878677	41	62256	81751	0.761532	1.09334	41	15271	18575	0.822127	1.18034	41	49010	50239	0.975537	1.40059
			0.696519
			Mean	1				Mean	0.765617				Mean	0.80298				Mean	1.21746				Mean	1.23754
			Std. Deviation	0.115271				Std. Deviation	0.139365				Std. Deviation	0.161579				Std. Deviation	0.128832				Std. Deviation	0.156103

## Sheet: Figure 4 Supplement B
	Septated cells						Multiseptated cells
	WT	rlc1(S35A)	wis1Δ	wis1Δ rlc1(S35A)			WT	rlc1(S35A)	wis1Δ	wis1Δ rlc1(S35A)
Replicate 1	20.5882	29.6296	17.8218	13.8298		Replicate 1	0	3.7037	0	0
Replicate 2	18.4783	31.6667	21	18.6046		Replicate 2	1.17391	4.16667	0	1.16279
Replicate 3	19.5876	26.2626	17.4312	20		Replicate 3	0	7.07071	0	0
Mean	19.5514	29.1863	18.751	17.4781		Mean	0.391304	4.98036	0	0.387597
Std. Deviation	1.05546	2.72916	1.95747	3.23568		Std. Deviation	0.677759	1.82503	0	0.671338

## Sheet: Figure 4 Supplement C
	OD600
	Wild type			sty1Δ			wis1Δ
Time (hours)	Replicate 1	Replicate 2	Replicate 3	Replicate 1	Replicate 2	Replicate 3	Replicate 1	Replicate 2	Replicate 3
0	0.21	0.23	0.18	0.2	0.18	0.21	0.23	0.2	0.16
2	0.29	0.31	0.28	0.26	0.21	0.24	0.21	0.24	0.24
4	0.36	0.38	0.34	0.31	0.34	0.3	0.26	0.29	0.31
6	0.45	0.54	0.51	0.46	0.4	0.37	0.33	0.39	0.31
8	0.67	0.73	0.71	0.55	0.61	0.51	0.32	0.38	0.41
10	0.78	0.81	0.76	0.76	0.88	0.72	0.44	0.4	0.37
12	1.21	1.16	1.08	0.99	0.97	1.04	0.46	0.42	0.49
14	1.97	1.82	1.99	1.16	1.28	1.34	0.49	0.44	0.46
16	2.34	2.22	2.39	1.55	1.48	1.77	0.66	0.71	0.75
18	3.15	3.36	2.95	2.29	2.65	2.7	1.02	1.01	0.88
20	3.63	3.57	3.79	2.99	2.89	3.41	0.97	1.12	1.37
22	4.02	4.35	4.37	3.64	3.47	3.76	1.17	1.04	1.21
24	4.69	4.52	4.68	4.02	3.87	4.07	1.41	1.21	1.16
36	4.46	4.32	4.48	4	4.15	4.32	1.39	1.52	1.24
48	4.38	4.52	4.27	4.08	4.04	4.16	1.32	1.28	1.25

## Sheet: Figure 4 Supplement D
	Septated cells
	WT	rlc1(S35A)	pyp1Δ	pyp1Δ rlc1(S35A)
Replicate 1	3.26087	3.09278	3.0303	9.09091
Replicate 2	4.16667	5.15464	4.16667	7.92079
Replicae 3	4.0404	4.25532	3.09278	7.2165
Mean	3.82265	4.16758	3.42992	8.07607
Std. Deviation	0.490592	1.03372	0.638808	0.946805
