# Supplementary material for: Myosin II regulatory light chain phosphorylation and formin availability modulate cytokinesis upon changes in carbohydrate metabolism
Source: eLife journal article supplement (doi:10.7554/elife.83285), 2023-02-24
Supplement: supp [file Figure 5 source data.xlsx]

## Sheet: Figure 5B
	Time (minutes)						Time (minutes)						Time (minutes)						µm/min
	Ring assembly and contraction						Node condensation and ring maturation						Ring constriction and dissasembly						Ring constriction rate
cell number	Myo2.E1 (Glu)		Myo2.E1 (Gly)			cell number	Myo2.E1 (Glu)		Myo2.E1 (Gly)			cell number	Myo2.E1 (Glu)		Myo2.E1 (Gly)			cell number	Myo2.E1 (Glu)		Myo2.E1 (Gly)
1	45	45	50	50		1	20	20	25	25		1	15	15	20	20		1	0.425733		0.33765
2	50	50	50	50		2	25	25	25	25		2	20	20	25	25		2	0.426897		0.35915
3	50	50	55	55		3	25	25	25	25		3	20	20	25	25		3	0.413733		0.316145
4	50	50	55	55		4	25	25	25	25		4	20	20	30	30		4	0.45247		0.35823
5	50	50	60	60		5	25	25	25	25		5	25	25	30	30		5	0.443329		0.340072
6	55	55	60	60		6	25	25	25	25		6	25	25	35	35		6	0.423509		0.33451
7	55	55	65	65		7	30	30	25	25		7	25	25	35	35		7	0.437658		0.296088
8	55	55	65	65		8	30	30	25	25		8	25	25	35	35		8	0.431834		0.300442
9	60	60	70	70		9	30	30	30	30		9	25	25	35	35		9	0.454578		0.328972
10	60	60	70	70		10	30	30	30	30		10	25	25	35	35		10	0.469071		0.312371
11	60	60	80	80		11	30	30	30	30		11	25	25	35	35		11	0.418161		0.335423
12	60	60	80	80		12	30	30	30	30		12	25	25	35	35		12	0.400689		0.294624
13	60	60	80	80		13	30	30	30	30		13	25	25	35	35		13	0.457307		0.323297
14	60	60	80	80		14	30	30	35	35		14	25	25	40	40		14	0.36391		0.33836
15	60	60	80	80		15	30	30	35	35		15	25	25	40	40		15	0.343922		0.290655
16	60	60	80	80		16	30	30	35	35		16	30	30	40	40		16	0.315097		0.322477
17	60	60	80	80		17	30	30	35	35		17	30	30	40	40		17	0.312762		0.314357
18	65	65	80	80		18	30	30	35	35		18	30	30	40	40		18	0.367401		0.31375
19	65	65	80	80		19	30	30	35	35		19	30	30	40	40		19	0.421625		0.295047
20	65	65	80	80		20	30	30	35	35		20	30	30	40	40		20	0.464705		0.305327
21	65	65	80	80		21	35	35	35	35		21	30	30	40	40		21	0.416282		0.31766
22	65	65	80	80		22	35	35	35	35		22	30	30	40	40		22	0.469921		0.315326
23	65	65	80	80		23	35	35	35	35		23	30	30	45	45		23	0.467632		0.336292
24	65	65	80	80		24	35	35	35	35		24	30	30	45	45		24	0.448805		0.30681
25	65	65	80	80		25	35	35	35	35		25	30	30	45	45		25	0.454445		0.203615
26	65	65	85	85		26	35	35	35	35		26	30	30	45	45		26	0.45732		0.231294
27	65	65	85	85		27	35	35	35	35		27	30	30	45	45		27	0.465554		0.206588
28	70	70	85	85		28	35	35	35	35		28	35	35	45	45		28	0.415421		0.238176
29	70	70	85	85		29	35	35	35	35		29	35	35	45	45		29	0.444077		0.294175
30	70	70	85	85		30	40	40	40	40		30	35	35	45	45		30	0.468202		0.339879
31	75	75	85	85		31	40	40	40	40		31	40	40	45	45		31	0.433513		0.358537
32	75	75	85	85		32	40	40	40	40		32	40	40	45	45
33	75	75	85	85		33	40	40	40	40		33	40	40	45	45
34			85	85		34			40	40		34			45	45			0.4253		0.3086		Mean
35			85	85		35			40	40		35			45	45			0.0433		0.03998		Std. Deviation
36			85	85		36			40	40		36			50	50			pvalue		<0,0001	<0,0001
37			85	85		37			40	40		37			50	50			Significantly different?		****	****
38			85	85		38			45	45		38			50	50
39			85	85		39			45	45		39			50	50
40			85	85		40			45	45		40			55	55
41			85	85		41			50	50		41			55	55
42			85	85		42			50	50		42			55	55
43			90	90		43			50	50		43			55	55
44			90	90		44			50	50		44			65	65
45			90	90		45			50	50		45			65	65
46			100	100		46			50	50		46			75	75
	61.67	61.67	78.59	78.59	Mean		31.52	31.52	36.2	36.2	Mean		28.33	28.33	43.04	43.04	Mean
	7.569	7.569	11.09	11.09	Std. Deviation		4.919	4.919	7.759	7.759	Std. Deviation		5.818	5.818	10.46	10.46	Std. Deviation
	pvalue		<0,0001	<0,0001			pvalue		<0,0001	<0,0001			pvalue		<0,0001	<0,0001
	Significantly different?		****	****			Significantly different?		****	****			Significantly different?		****	****

## Sheet: Figure 5D
	Time (minutes)						Time (minutes)						Time (minutes)						µm/min
	Ring assembly and contraction						Node condensation and ring maturation						Ring constriction and dissasembly						Ring constriction rate
cell number	Myo2.E1		Myo2.E1 for3DAD			cell number	Myo2.E1		Myo2.E1 for3DAD			cell number	Myo2.E1		Myo2.E1 for3DAD			cell number	Myo2.E1		Myo2.E1 for3DAD
1	60	60	50	50		1	25	25	25	25		1	30	30	20	20		1	0.339448		0.325828
2	65	65	55	55		2	25	25	25	25		2	30	30	20	20		2	0.329314		0.316773
3	65	65	55	55		3	30	30	25	25		3	30	30	20	20		3	0.333323		0.315962
4	65	65	55	55		4	30	30	25	25		4	30	30	20	20		4	0.367966		0.328196
5	65	65	55	55		5	30	30	25	25		5	35	35	20	20		5	0.342857		0.310237
6	75	75	55	55		6	30	30	25	25		6	35	35	20	20		6	0.328857		0.330169
7	75	75	55	55		7	30	30	25	25		7	35	35	20	20		7	0.340282		0.319613
8	75	75	55	55		8	30	30	25	25		8	35	35	25	25		8	0.333005		0.353994
9	75	75	55	55		9	30	30	30	30		9	35	35	25	25		9	0.306496		0.411541
10	75	75	55	55		10	30	30	30	30		10	35	35	25	25		10	0.314551		0.369914
11	75	75	55	55		11	30	30	30	30		11	40	40	25	25		11	0.368429		0.404112
12	75	75	55	55		12	30	30	30	30		12	40	40	25	25		12	0.354027		0.375389
13	75	75	55	55		13	30	30	30	30		13	40	40	25	25		13	0.220209		0.395915
14	75	75	55	55		14	30	30	30	30		14	40	40	25	25		14	0.262591		0.371424
15	80	80	55	55		15	30	30	30	30		15	40	40	25	25		15	0.248905		0.403477
16	80	80	55	55		16	30	30	30	30		16	40	40	25	25		16	0.243464		0.358723
17	80	80	55	55		17	30	30	30	30		17	40	40	25	25		17	0.223532		0.377765
18	80	80	55	55		18	30	30	30	30		18	40	40	25	25		18	0.254443		0.359879
19	80	80	55	55		19	30	30	30	30		19	45	45	25	25		19	0.215938		0.350023
20	80	80	55	55		20	35	35	30	30		20	45	45	25	25		20	0.234273		0.411109
21	80	80	55	55		21	35	35	30	30		21	45	45	25	25		21	0.201035		0.378633
22	80	80	55	55		22	35	35	30	30		22	45	45	25	25		22	0.314201		0.40341
23	80	80	55	55		23	35	35	30	30		23	45	45	25	25		23	0.352595		0.373571
24	80	80	60	60		24	35	35	30	30		24	45	45	25	25		24	0.324129		0.391858
25	80	80	60	60		25	40	40	30	30		25	45	45	25	25		25	0.324867		0.36106
26	80	80	60	60		26	40	40	30	30		26	45	45	30	30		26	0.357362		0.355251
27	80	80	60	60		27	40	40	30	30		27	45	45	30	30		27	0.321607		0.381108
28	80	80	60	60		28	40	40	30	30		28	45	45	30	30		28	0.300076		0.36145
29	80	80	60	60		29	40	40	30	30		29	45	45	30	30		29	0.322681		0.416484
30	80	80	60	60		30	45	45	30	30		30	45	45	30	30		30	0.325238		0.386721
31	85	85	65	65		31	45	45	30	30		31	45	45	30	30		31	0.361252		0.371911
32	85	85	65	65		32	45	45	30	30		32	50	50	30	30
33	85	85	65	65		33	50	50	30	30		33	50	50	30	30
34	85	85	65	65		34	50	50	35	35		34	50	50	30	30			0.3054		0.3668		Mean
35	90	90	65	65		35	50	50	35	35		35	50	50	30	30			0.05033		0.03099		Std. Deviation
36	90	90	65	65		36	50	50	35	35		36	50	50	30	30			pvalue		<0,0001	<0,0001
37	90	90	65	65		37	50	50	35	35		37	55	55	35	35			Significantly different?		****	****
38	100	100	70	70		38	50	50	35	35		38	55	55	35	35
39	100	100	70	70		39	50	50	35	35		39	55	55	35	35
40	100	100	70	70		40	50	50	35	35		40	55	55	35	35
41			85	85		41			35	35		41			35	35
42			85	85		42			35	35		42			35	35
43			85	85		43			35	35		43			35	35
	79.63	79.63	60.47	60.47	Mean		36.75	36.75	30.23	30.23	Mean		42.63	42.63	27.09	27.09	Mean
	8.943	8.943	8.438	8.438	Std. Deviation		8.363	8.363	3.265	3.265	Std. Deviation		7.16	7.16	4.785	4.785	Std. Deviation
	pvalue		<0,0001	<0,0001			pvalue		<0,0001	<0,0001			pvalue		<0,0001	<0,0001
	Significantly different?		****	****			Significantly different?		****	****			Significantly different?		****	****
