# Supplementary material for: Myosin II regulatory light chain phosphorylation and formin availability modulate cytokinesis upon changes in carbohydrate metabolism
Source: eLife journal article supplement (doi:10.7554/elife.83285), 2023-02-24
Supplement: supp [file Figure 5 supplement 1 source data.xlsx]

## Sheet: Figure 5 Supplement 1 A
	Multiseptated cells
	Myo2.E1 (Glu)	Myo2.E1 (Gly)
Replicate 1	6.95652	21.9298
Replicate 2	1.94175	27.4648
Replicate 3	5.21739	28.4404
Mean	4.70522	25.945
Std. Deviation	2.54632	3.51129

## Sheet: Figure 5 Supplement 1 B
	Wild type Glucose (not shown in figure)					Myo2.E1					Myo2.E1 for3DAD
cell number	Calbe area (U.R.)	Patch area (U.R.)	Cable to patch ratio (U.R.)	Normalized mean	cell number	Calbe area (U.R.)	Patch area (U.R.)	Cable to patch ratio (U.R.)	Normalized mean	cell number	Calbe area (U.R.)	Patch area (U.R.)	Cable to patch ratio (U.R.)	Normalized mean
1	13259	25569	0.518558	0.751238	1	13457	37485	0.358997	0.520082	1	16591	22757	0.72905	1.12587
2	15692	26159	0.59987	0.869036	2	24483	46901	0.522014	0.756246	2	23242	29938	0.776338	1.1989
3	12112	27340	0.443014	0.641798	3	21891	49962	0.438153	0.634756	3	17761	23689	0.749757	1.15785
4	21352	31520	0.677411	0.981371	4	26224	52634	0.498233	0.721794	4	22830	29524	0.773269	1.19416
5	26729	37509	0.712602	1.03235	5	17162	41738	0.411184	0.595686	5	16715	23911	0.699051	1.07954
6	23937	36530	0.65527	0.949294	6	25942	54615	0.474998	0.688133	6	17198	21091	0.815419	1.25925
7	21964	36369	0.603921	0.874905	7	10058	35529	0.283093	0.410119	7	16416	23629	0.69474	1.07288
8	15478	28013	0.552529	0.800453	8	17136	44991	0.380876	0.551778	8	17194	21594	0.79624	1.22963
9	12047	23073	0.522125	0.756407	9	16324	41612	0.392291	0.568315	9	13783	18404	0.748913	1.15655
10	18555	33641	0.551559	0.799048	10	16432	40823	0.402518	0.583131	10	19055	26271	0.725325	1.12012
11	19695	35959	0.547707	0.793468	11	19003	45734	0.415511	0.601955	11	17091	23613	0.723796	1.11776
12	18569	29226	0.635359	0.920449	12	18709	44979	0.41595	0.60259	12	22091	29621	0.745788	1.15172
13	18317	30867	0.593417	0.859688	13	15013	39574	0.379365	0.549589	13	24315	31220	0.778828	1.20274
14	49066	60303	0.813658	1.17875	14	44177	75616	0.584228	0.846376	14	15124	19989	0.756616	1.16844
15	48631	64356	0.755656	1.09472	15	59123	87799	0.67339	0.975546	15	14170	20168	0.702598	1.08502
16	46353	64421	0.719532	1.04239	16	52995	91941	0.576402	0.835038	16	21415	26577	0.805772	1.24435
17	55930	71729	0.77974	1.12962	17	58637	94326	0.621642	0.900578	17	17491	22463	0.778658	1.20248
18	61111	78685	0.776654	1.12514	18	49254	81832	0.601892	0.871965	18	12670	18189	0.696575	1.07572
19	62716	74214	0.84507	1.22426	19	57074	96471	0.591618	0.857082	19	20634	25669	0.803849	1.24138
20	63508	71520	0.887975	1.28642	20	42698	70193	0.608294	0.881241	20	17493	18710	0.934955	1.44385
21	52719	63615	0.82872	1.20057	21	46983	86454	0.543445	0.787293	21	24970	32078	0.778415	1.2021
22	45798	57160	0.801225	1.16074	22	47607	81787	0.582085	0.843271	22	13189	18360	0.718355	1.10935
23	56856	71280	0.797643	1.15555	23	48372	80566	0.600402	0.869807	23	19966	25210	0.791987	1.22306
24	58231	74092	0.785928	1.13858	24	50280	87143	0.576983	0.835879	24	17871	21956	0.813946	1.25698
25	52329	68810	0.760485	1.10172	25	50200	86187	0.582454	0.843806	25	18143	24867	0.729601	1.12672
26	56967	66978	0.850533	1.23217	26	46201	78842	0.585995	0.848935	26	62719	67704	0.926371	1.43059
27	11915	24748	0.481453	0.697485	27	20010	47935	0.41744	0.604749	27	49870	58157	0.857506	1.32425
28	16062	29354	0.547183	0.792708	28	16838	40967	0.411014	0.595439	28	53754	60975	0.881574	1.36141
29	12888	23826	0.540922	0.783637	29	14352	41511	0.34574	0.500876	29	60698	64087	0.947119	1.46263
30	13705	25358	0.540461	0.782969	30	12363	36155	0.341944	0.495378	30	55336	60031	0.92179	1.42352
31	22640	33049	0.685043	0.992428	31	20229	45663	0.443006	0.641787	31	55556	61774	0.899343	1.38885
32	19054	32063	0.594268	0.86092	32	20875	48978	0.426212	0.617456	32	47324	55618	0.850876	1.31401
33	14924	27574	0.541234	0.784091	33	11088	36196	0.306332	0.443786	33	62217	67368	0.923539	1.42622
34	46515	59510	0.781633	1.13236	34	50792	89789	0.565682	0.819508	34	59704	63190	0.944833	1.4591
35	53489	65675	0.81445	1.1799	35	49109	80715	0.608425	0.88143	35	50589	58202	0.869197	1.3423
36	46884	58700	0.798705	1.15709	36	43268	81976	0.527813	0.764647	36	64691	69559	0.930016	1.43622
37	49581	59974	0.826708	1.19766	37	42557	73431	0.579551	0.8396	37	48335	55616	0.869084	1.34213
38	57203	73643	0.776761	1.1253	38	52646	86855	0.606137	0.878115	38	58778	62874	0.934854	1.44369
39	57926	68525	0.845327	1.22463	39	51755	90927	0.569193	0.824594	39	56057	59013	0.949909	1.46694
40	51805	63138	0.820504	1.18867	40	44868	70914	0.63271	0.916612	40	55965	63320	0.883844	1.36492
		Ratio mean	0.69027
			Mean	1				Mean	0.720124				Mean	1.26083
			Std. Deviation	0.184405				Std. Deviation	0.153376				Std. Deviation	0.12975

## Sheet: Figure 5 Supplement 1 C
	Septated cells						Multiseptated cells
	Myo2.E1		Myo2.E1 for3DAD				Myo2.E1		Myo2.E1 for3DAD
Replicate 1	36.7347		29.7872			Replicate 1	12.2449	12.2449	2.12766	2.12766
Replicate 2	38.1443		32.7273			Replicate 2	15.4639	15.4639	4.54545	4.54545
Replicate 3	28.5714		23.8532			Replicate 3	16.9643	16.9643	4.58716	4.58716
Mean	34.4835		28.7892			Mean	14.891		3.75342
Std. Deviation	5.16828		4.52042			Std. Deviation	2.15672		1.25945
