# Supplementary material for: Myosin II regulatory light chain phosphorylation and formin availability modulate cytokinesis upon changes in carbohydrate metabolism
Source: eLife journal article supplement (doi:10.7554/elife.83285), 2023-02-24
Supplement: supp [file Figure 5 supplement 2 source data.xlsx]

## Sheet: Figure 5 supplement 2 A
	Time (min)									Time (min)
	Glucose									Glycerol								Ring constriction rate (µm/min)
	Ring assembly and contraction									Ring assembly and contraction								Glucose		Glycerol
cell number	WT	myp2Δ							cell number	WT	myp2Δ						cell number	WT	myp2Δ	WT	myp2Δ		WT	myp2Δ	WT	myp2Δ
1	37.5	40		WT	myp2Δ				1	45	45			WT	myp2Δ		1	0.554894	0.55287	0.520987	0.405534		0.5839	0.5418	0.4972	0.44	Mean
2	37.5	40		39.82	47.3	Mean			2	50	45			50.3	58	Mean	2	0.572768	0.573797	0.517019	0.474026		0.01983	0.02782	0.02068	0.0302	Std. Deviation
3	37.5	40		1.968	4.801	Std. Deviation			3	50	45			1.477	7.896	Std. Deviation	3	0.558276	0.565356	0.484024	0.459401		pvalue	<0,0001	pvalue	<0,0001
4	37.5	40		pvalue	<0,0001				4	50	50			pvalue	<0,0001		4	0.558057	0.5022	0.494339	0.423486		Significant differences?	****	Significant differences?	****
5	37.5	40		Significant differences?	****				5	50	50			Significant differences?	****		5	0.551899	0.518034	0.486781	0.425367
6	37.5	40							6	50	50						6	0.598738	0.578163	0.502741	0.406334
7	37.5	40							7	50	50						7	0.594053	0.515055	0.463212	0.395405
8	37.5	42.5							8	50	50						8	0.597411	0.504291	0.478398	0.461258
9	37.5	42.5							9	50	50						9	0.590836	0.588372	0.528194	0.392147
10	37.5	42.5							10	50	50						10	0.606045	0.534539	0.485176	0.485843
11	37.5	42.5							11	50	50						11	0.605414	0.538037	0.470687	0.442177
12	37.5	45							12	50	50						12	0.609823	0.576385	0.481295	0.414769
13	37.5	45							13	50	50						13	0.604514	0.566927	0.482593	0.416524
14	37.5	45							14	50	50						14	0.608534	0.560497	0.528454	0.432753
15	40	47.5							15	50	50						15	0.572213	0.556238	0.506859	0.412781
16	40	47.5							16	50	50						16	0.577879	0.525573	0.518953	0.478433
17	40	50							17	50	50						17	0.558311	0.540931	0.526645	0.422573
18	40	50							18	50	50						18	0.606695	0.513281	0.472508	0.431567
19	40	50							19	50	55						19	0.600445	0.549447	0.4917	0.475872
20	40	50							20	50	55						20	0.567441	0.512037	0.512803	0.469467
21	40	50							21	50	55						21	0.590997	0.503969	0.518409	0.417
22	40	50							22	50	55						22	0.555266	0.596578	0.476923	0.442655
23	40	50							23	50	55						23	0.598192	0.5704	0.469088	0.470802
24	40	50							24	50	55						24	0.558975	0.524857	0.4974	0.3932
25	40	50							25	50	55						25	0.573446	0.515011	0.526627	0.453076
26	40	50							26	50	55						26	0.602338	0.511067	0.524399	0.480653
27	40	50							27	50	55						27	0.590085	0.54592	0.475152	0.489125
28	40	50							28	50	55						28	0.565113	0.567303	0.490793	0.47008
29	40	50							29	50	55						29	0.583357	0.519962	0.50265	0.418448
30	40	50							30	50	55						30	0.605042	0.528117	0.481853	0.43846
31	42.5	50							31	50	55
32	42.5	50							32	50	60
33	42.5	52.5							33	50	60
34	42.5	52.5							34	50	60
35	42.5	55							35	50	60
36	42.5	55							36	50	60
37	42.5	55							37	50	60
38	42.5								38	50	60
39	42.5								39	50	60
40	42.5								40	50	60
41	42.5								41	50	60
									42	50	60
									43	50	60
									44	50	60
									45	50	60
									46	50	60
									47	50	60
									48	50	60
									49	50	60
									50	50	60
									51	50	60
									52	50	60
									53	50	65
									54	50	65
									55	50	65
									56	50	65
									57	50	65
									58	50	65
									59	50	70
									60	50	70
									61	50	70
									62	50	70
									63	55	80
									64	55	80
									65	55	80
									66	55
									67	55

## Sheet: Figure 5 supplement 2 B
	Glucose
	Septated cells										Multiseptated cells
	WT		myp2Δ		rlc1(S35A)		myp2Δ rlc1(S35A)				WT		myp2Δ		rlc1(S35A)		myp2Δ rlc1(S35A)
Replicate 1	27.8846		32.2917		24.4681		34.6939			Replicate 1	0	0	0	0	0	0	2.08333	2.08333
Replicate 2	24.2718		32.3529		26.2626		34.9057			Replicate 2	0	0	0.990099	0.990099	0	0	2.91262	2.91262
Replicate 3	22.449		38.1443		22.8571		33.6449			Replicate 3	0	0	0	0	0	0	0	0
Mean	24.8685		34.263		24.5293		34.4148			Mean	0		0.330033		0		1.66532
Std. Deviation	2.7665		3.36149		1.70357		0.675143			Std. Deviation	0		0.511285		0		1.3422
	Glycerol
	Septated cells										Multiseptated cells
	WT		myp2Δ		rlc1(S35A)		myp2Δ rlc1(S35A)				WT		myp2Δ		rlc1(S35A)		myp2Δ rlc1(S35A)
Replicate 1	19.3878	19.3878	29	29	20.9091	20.9091	31.5217	31.5217		Replicate 1	0	0	5.15464	5.15464	2.72727	2.72727	8.69565	8.69565
Replicate 2	22.2222	22.2222	30.6122	30.6122	16.0377	16.0377	36.3636	36.3636		Replicate 2	0	0	4	4	1.88679	1.88679	9.09091	9.09091
Replicate 3	22.7723	22.7723	25.4902	25.4902	17.2727	17.2727	39.1304	39.1304		Replicate 3	0	0	8.08081	8.08081	4.54545	4.54545	6.52174	6.52174
Mean	21.4608		28.3675		18.0732		35.6719			Mean	0		5.74515		3.05317		8.10277
Std. Deviation	1.62447		2.34246		2.26505		3.44464			Std. Deviation	0		1.88144		1.21549		1.23735
