# Supplementary material for: Myosin II regulatory light chain phosphorylation and formin availability modulate cytokinesis upon changes in carbohydrate metabolism
Source: eLife journal article supplement (doi:10.7554/elife.83285), 2023-02-24
Supplement: supp [file Figure 6 source data.xlsx]

## Sheet: Figure 6A
		Replicate 1					Replicate 2					Replicate 3
		For3 intensity	cdc2 intensity	ratio For3/cdc2	mean		For3 intensity	cdc2 intensity	ratio For3/cdc2	mean		For3 intensity	cdc2 intensity	ratio For3/cdc2	mean		Mean	Std. Deviation
Wild type glucose -GSH		32.068	24.348	1.31707	1		31.913	26.265	1.21504	0.922532		30.689	26.315	1.16622	0.885464		0.935999	0.0413899
Wild type glycerol -GSH		21.76	25.494	0.853534	0.648056		14.188	24.491	0.579315	0.439852		16.502	24.462	0.674597	0.512196		0.533368	0.104281
Wild type glucose +GSH		36.159	26.185	1.38091	1.04847		35.327	24.195	1.4601	1.10859		26.032	24.27	1.0726	0.814384		0.990482	0.0590592
Wild type glycerol +GSH		30.014	23.973	1.25199	0.950589		26.572	25.049	1.0608	0.805425		26.776	24.952	1.0731	0.814764		0.856926	0.0735954

## Sheet: Figure 6B
	Time (minutes)																										µm/min
	Ring assembly and contraction																										Ring constriction rate
cell number	Wild type -GSH			Wild type +GSH			rlc1(S35A)-GSH			rlc1(S35A) +GSH			Myo2.E1 -GSH			Myo2.E1 +GSH			wis1Δ -GSH			wis1Δ +GSH				cell number	Wild type -GSH			Wild type +GSH			rlc1(S35A)-GSH			rlc1(S35A) +GSH			Myo2.E1 -GSH			Myo2.E1 +GSH			wis1Δ -GSH			wis1Δ +GSH
1		45			45			50			50			65		60	60	60		45			45			1		0.49735			0.45322			0.409057			0.477837			0.362116			0.379268			0.490769			0.485397
2		45			45			50			50			65		60	60	60		45			45			2		0.475254			0.455131			0.360758			0.429931			0.311205			0.369446			0.489722			0.47179
3		45			45			50			50			65		60	60	60		45			45			3		0.49598			0.470614			0.375242			0.461043			0.318414			0.365839			0.500658			0.482807
4		45			45			50			50			70		60	60	60		45			45			4		0.519628			0.454685			0.398644			0.43406			0.348703			0.340257			0.45582			0.486432
5		45			45			50			50			70		60	60	60		45			45			5		0.452781			0.507464			0.392405			0.434749			0.308299			0.388749			0.461948			0.518321
6		45			45			55			50			70		60	60	60		45			45			6		0.48313			0.484536			0.387147			0.426214			0.348723			0.389911			0.475685			0.497516
7		45			45			55			50			70		60	60	60		45			45			7		0.494959			0.499685			0.37484			0.415109			0.326773			0.357578			0.511741			0.509203
8		45			45			55			50			70		60	60	60		45			45			8		0.454132			0.475174			0.351868			0.453751			0.335897			0.335106			0.484802			0.51108
9		45			45			55			50			75		60	60	60		45			45			9		0.458286			0.501106			0.385505			0.421917			0.32493			0.355715			0.509409			0.499208
10		45			45			55			50			75		65	65	65		45			45			10		0.483615			0.460176			0.415506			0.471735			0.363144			0.331056			0.5091			0.50424
11		50			45			55			50			75		65	65	65		50			45			11		0.490161			0.512582			0.418088			0.468552			0.320794			0.353053			0.4801			0.509611
12		50			45			55			50			80			65			50			45			12		0.459514			0.468828			0.373767			0.435938			0.202328			0.373994			0.459145			0.487594
13		50			45			55			50			80			70			50			45			13		0.506878			0.458694			0.4127			0.413117			0.238464			0.378126			0.453538			0.479187
14		50			45			55			50			80			70			50			45			14		0.470955			0.510585			0.389141			0.457465			0.205618			0.353703			0.491752			0.495173
15		50			45			55			50			80			70			50			45			15		0.513777			0.459583			0.392743			0.46529			0.225933			0.374832			0.518436			0.510793
16		50			45			55			50			80			70			50			45			16		0.46423			0.482454			0.379464			0.443578			0.234315			0.377614			0.472979			0.466415
17		50			45			55			50			80			70			50			45			17		0.458351			0.468064			0.40709			0.428988			0.25429			0.355184			0.502704			0.506668
18		50			45			55			50			80			70			50			50			18		0.453899			0.507169			0.376287			0.428613			0.251517			0.346964			0.462766			0.480347
19		50			45			60			50			80			75			50			50			19		0.513879			0.499927			0.374517			0.413598			0.231714			0.355155			0.461757			0.517021
20		50			45			60			50			80			75			50			50			20		0.466444			0.484775			0.359139			0.460965			0.242929			0.36329			0.465719			0.469525
21		50			45			60			50			80			75			50			50			21		0.45173			0.497549			0.35852			0.455107			0.344443			0.347996			0.462689			0.452502
22		50			45			60			50			80			75			50			50			22		0.459896			0.466936			0.367597			0.434341			0.350029			0.273891			0.514441			0.462472
23		50			45			60			50			80			75			50			50			23		0.507277			0.462636			0.375218			0.418787			0.32785			0.250011			0.516729			0.455439
24		50			45			60			50			80			75			50			50			24		0.480817			0.490098			0.359478			0.4244			0.309585			0.279028			0.497991			0.45771
25		50			45			60			50			80			80			50			50			25		0.472964			0.50994			0.356769			0.453728			0.301772			0.248811			0.491031			0.456934
26		50			45			60			50			85			80			50			50			26		0.471504			0.49739			0.382573			0.457578			0.331037			0.250472			0.488329			0.491528
27		50			45			60			50			85			80			50			50			27		0.453814			0.484099			0.411377			0.412389			0.336723			0.230043			0.451874			0.501209
28		50			45			60			55			90			80			50			50			28		0.508086			0.483904			0.369494			0.424519			0.36972			0.286344			0.507061			0.518768
29		50			45			60			55			90			80			50			50			29		0.489772			0.519145			0.362424			0.424342			0.361881			0.265177			0.467429			0.508158
30		50			45			60			55			90			80			50			50			30		0.483792			0.512323			0.386213			0.413969			0.307405			0.241618			0.456869			0.45033
31		50			45			60			55			90			80			50			50
32		50			45			60			55			90			85			50			50					0.4808			0.485			0.3814			0.4379			0.3047			0.3283			0.4838			0.4881
33		50			50			60			55			90			85			50			50					0.02164			0.02048			0.01937			0.02013			0.05126			0.05173			0.02165			0.02171
34		50			50			60			55			90			85			50			50				pvalue			0.22357						0.0005	0.0234	0.0234				0.0008	0.0003	0.0003				0,4417/0,16874	0.0003
35		50			50			60			55			90			85			50			50				Significant differences?			ns						***	*	*				***	***	***				ns	***
36		50			50			65			55			90			85			50			50
37		50			50			65			55			95			85			50			50
38		50			50			65			55						90			50			50
39		50			50			65			55						90			50			50
40		50			50			70			55						90			50			50
41		50			50			70			55						90			50			50
42		50			50			70			55						90			50			50
43		50			50			70			55									50			50
44		50			50			75			60									50			50
45		50			50						60									50			50
46		50			50						60									50			50
47		50			50						60									50			50
48		50			50						60									50			50
49		50			50						60									50			50
50		50			50						60									50			50
51		50			50						60									50			50
52		50			50						60									50			50
53		50			50						60									50			50
54		55			50						60									50			50
55		55			50						60									50			50
56		55			50						60									50			50
57					50						65									50			55
58					50						65									55			55
59					50						65									55			55
60					50						65									55			55
61					50						65									55			55
62					50						65									55			55
63					50						65									55			55
64					50						65									55			55
65					50																		55
66					50																		55
67					50																		55
68					55
69					55
70					55
71					55
72					55
73					55
	49.38			48.22			59.09			55.16			80.14			74.4			49.77			49.55			Mean
	2.348			3.159			5.933			5.343			8.206			10.31			2.587			3.225			Std. Deviation
	pvalue			0.1016						0.0234	0.0234	0.0234				0.0003	0.0003	0.0003				0.5476	0.0003	0.0003
	Significant differences?			ns						*	*	*				***	***	***				ns	***	***
[truncated: 1 more columns]
