# Supplementary material for: Myosin II regulatory light chain phosphorylation and formin availability modulate cytokinesis upon changes in carbohydrate metabolism
Source: eLife journal article supplement (doi:10.7554/elife.83285), 2023-02-24
Supplement: supp [file Figure 6 supplement source data.xlsx]

## Sheet: Figure 6 supplement A
	Wild type Glucose (not shown in figure)					Wild type -GSH					Wild type +GSH					rlc1(S35A) -GSH					rlc1(S35A) +GSH					myo2.E1 -GSH					myo2.E1 +GSH
cell number	Calbe area (U.R.)	Patch area (U.R.)	Cable to patch ratio (U.R.)	Normalized mean	cell number	Calbe area (U.R.)	Patch area (U.R.)	Cable to patch ratio (U.R.)	Normalized mean	cell number	Calbe area (U.R.)	Patch area (U.R.)	Cable to patch ratio (U.R.)	Normalized mean	cell number	Calbe area (U.R.)	Patch area (U.R.)	Cable to patch ratio (U.R.)	Normalized mean	cell number	Calbe area (U.R.)	Patch area (U.R.)	Cable to patch ratio (U.R.)	Normalized mean	cell number	Calbe area (U.R.)	Patch area (U.R.)	Cable to patch ratio (U.R.)	Normalized mean	cell number	Calbe area (U.R.)	Patch area (U.R.)	Cable to patch ratio (U.R.)	Normalized mean
1	14954	21809	0.68568	0.915046	1	22758	41975	0.54218	0.723544	1	11262	28486	0.395352	0.527601	1	25238	48066	0.52507	0.70071	1	21805	37679	0.578704	0.772286	1	17115	48614	0.352059	0.469826	1	21783	38816	0.561186	0.748908
2	10728	15342	0.699257	0.933165	2	25692	43831	0.58616	0.782236	2	15774	34928	0.451615	0.602684	2	18623	38361	0.485467	0.64786	2	10362	27970	0.370468	0.494393	2	21636	36443	0.593694	0.79229	2	21470	43506	0.493495	0.658574
3	17611	23811	0.739616	0.987024	3	21373	44036	0.485353	0.647708	3	24697	44086	0.560201	0.747593	3	12574	35313	0.356073	0.475182	3	22351	37497	0.596074	0.795466	3	15147	47419	0.319429	0.426281	3	17017	33783	0.503715	0.672212
4	19281	21672	0.889673	1.18728	4	16243	35335	0.459686	0.613455	4	20307	41657	0.487481	0.650548	4	20438	49299	0.414572	0.55325	4	12828	29340	0.437219	0.583472	4	14873	42916	0.346561	0.462488	4	8850	25574	0.346055	0.461813
5	19300	25472	0.757695	1.01115	5	23563	50799	0.463848	0.619009	5	29112	46234	0.629666	0.840295	5	27302	44376	0.615242	0.821046	5	22433	30345	0.739265	0.986556	5	27628	37137	0.743948	0.992805	5	13361	32522	0.41083	0.548256
6	20242	23322	0.867936	1.15827	6	10643	31515	0.337712	0.45068	6	17307	33761	0.512633	0.684113	6	19677	42225	0.466004	0.621886	6	24393	41597	0.586412	0.782573	6	15254	37911	0.402363	0.536958	6	19138	36855	0.519278	0.692981
7	18298	24854	0.73622	0.982491	7	18228	42740	0.426486	0.569149	7	11568	28852	0.400943	0.535062	7	19282	41386	0.465906	0.621756	7	23277	47458	0.490476	0.654544	7	16070	44511	0.361034	0.481804	7	20463	40776	0.501839	0.669709
8	14932	25897	0.576592	0.769467	8	49403	83937	0.588572	0.785455	8	19148	35601	0.53785	0.717766	8	26576	48153	0.551907	0.736525	8	29108	36638	0.794476	1.06023	8	13806	36398	0.379307	0.506188	8	22000	38980	0.564392	0.753186
9	8797	11190	0.786148	1.04912	9	23596	42247	0.558525	0.745356	9	17343	33923	0.511246	0.682262	9	20377	43046	0.473377	0.631726	9	22387	39162	0.571651	0.762873	9	21565	44672	0.482741	0.644222	9	48854	45111	1.08297	1.44524
10	16979	29480	0.57595	0.76861	10	16441	40370	0.407258	0.543489	10	21682	40623	0.533737	0.712277	10	30349	55350	0.548311	0.731726	10	29728	40874	0.727308	0.970599	10	19155	41360	0.463129	0.618049	10	21662	42702	0.507283	0.676974
11	11564	16539	0.699196	0.933083	11	16320	35397	0.461056	0.615283	11	20005	38037	0.525935	0.701865	11	22133	45330	0.488264	0.651592	11	20731	43033	0.481747	0.642895	11	17979	50007	0.35953	0.479795	11	21159	39882	0.53054	0.70801
12	12952	16474	0.786209	1.0492	12	50417	72905	0.691544	0.922871	12	11736	29054	0.403937	0.539058	12	20293	42241	0.48041	0.641111	12	17285	42805	0.403808	0.538885	12	16626	39081	0.425424	0.567732	12	18061	35283	0.51189	0.683121
13	13074	17876	0.731372	0.976022	13	24438	51286	0.476504	0.635899	13	11568	33761	0.342644	0.457261	13	22286	46164	0.482757	0.644244	13	16320	38860	0.419969	0.560452	13	18674	41727	0.447528	0.59723	13	24505	43041	0.569341	0.75979
14	23061	29037	0.794194	1.05986	14	12631	33666	0.375186	0.500689	14	13852	33923	0.408337	0.544929	14	25425	48081	0.528795	0.705682	14	53072	77791	0.682238	0.910453	14	16751	41529	0.403357	0.538283	14	21217	41404	0.512438	0.683854
15	52282	58467	0.894214	1.19334	15	24843	43988	0.564768	0.753687	15	45408	62271	0.7292	0.973124	15	17243	39175	0.440153	0.587388	15	56022	78274	0.715717	0.95513	15	17198	48632	0.353635	0.47193	15	40521	57207	0.708322	0.945262
16	48209	54818	0.879437	1.17362	16	21493	48517	0.442999	0.591187	16	29112	61201	0.475679	0.634797	16	28528	48126	0.592777	0.791067	16	46761	58529	0.798937	1.06619	16	19270	46392	0.415373	0.554319	16	59800	76692	0.779742	1.04057
17	14301	19095	0.74894	0.999466	17	22134	47003	0.470906	0.628428	17	15774	80871	0.195051	0.260298	17	16516	40371	0.409106	0.545955	17	57370	77709	0.738267	0.985224	17	13768	37044	0.371666	0.495992	17	60451	81698	0.739932	0.987446
18	9776	12434	0.786231	1.04923	18	17578	38744	0.453696	0.605461	18	60355	79807	0.756262	1.00924	18	18309	46247	0.395896	0.528327	18	48040	63472	0.756869	1.01005	18	22253	40451	0.550122	0.734143	18	54088	70232	0.770133	1.02775
19	9888	15691	0.63017	0.840968	19	22072	45151	0.488849	0.652373	19	59044	79764	0.740234	0.987848	19	28650	48821	0.586838	0.78314	19	61147	66606	0.91804	1.22513	19	15908	46818	0.339784	0.453445	19	53999	73142	0.738276	0.985236
20	15335	26626	0.575941	0.768598	20	19561	38992	0.501667	0.669479	20	66503	84897	0.783337	1.04537	20	19508	43801	0.445378	0.594361	20	62574	79805	0.784086	1.04637	20	17282	39678	0.435556	0.581254	20	58097	78436	0.740693	0.988461
21	11022	15391	0.716133	0.955686	21	22622	45780	0.494146	0.659442	21	31234	65188	0.479137	0.639413	21	23044	45601	0.50534	0.67438	21	62351	85807	0.726642	0.969711	21	14734	45062	0.326972	0.436347	21	59432	75055	0.791846	1.05673
22	13456	18252	0.737234	0.983846	22	22639	47349	0.47813	0.638069	22	47856	73314	0.652754	0.871106	22	20509	40219	0.509933	0.68051	22	60589	82405	0.735259	0.981209	22	19769	37338	0.529461	0.70657	22	61661	83524	0.738243	0.985192
23	18472	23175	0.797066	1.06369	23	20999	40389	0.519919	0.693836	23	45982	71032	0.647342	0.863884	23	28736	45536	0.631061	0.842157	23	60007	77486	0.774424	1.03348	23	18474	38794	0.476208	0.635503	23	60946	80525	0.756858	1.01003
24	10557	13427	0.786252	1.04926	24	17529	41709	0.420269	0.560853	24	50155	73334	0.683926	0.912705	24	23478	44232	0.530792	0.708347	24	66219	81137	0.816138	1.08914	24	16518	33642	0.490993	0.655235	24	60868	76760	0.792965	1.05822
25	19305	26690	0.723305	0.965256	25	48682	82631	0.589149	0.786225	25	58558	77580	0.754808	1.0073	25	14128	36743	0.384509	0.51313	25	66429	74439	0.892395	1.19091	25	15960	33765	0.472679	0.630794	25	56119	75612	0.742197	0.990468
26	9505	12927	0.735283	0.981241	26	27533	53469	0.514934	0.687184	26	46294	63173	0.732813	0.977945	26	22660	45073	0.50274	0.670911	26	53983	82814	0.651858	0.869911	26	50756	69964	0.725459	0.968131	26	56672	79555	0.712363	0.950654
27	12987	18425	0.704858	0.940639	27	13664	32891	0.415433	0.554399	27	52624	76245	0.690196	0.921073	27	23006	44747	0.514135	0.686118	27	24724	40748	0.606754	0.809718	27	53761	87650	0.61336	0.818534	27	60439	79726	0.758084	1.01167
28	14614	25346	0.57658	0.769451	28	16656	38712	0.430254	0.574178	28	18982	40710	0.466274	0.622246	28	19435	41646	0.466671	0.622777	28	23960	48474	0.494286	0.659628	28	61228	90291	0.678119	0.904955	28	17458	35252	0.495234	0.660895
29	16890	22061	0.765604	1.02171	29	13578	34454	0.394091	0.525917	29	18499	34285	0.539565	0.720055	29	20804	44191	0.470775	0.628253	29	17743	33770	0.525407	0.70116	29	54738	74858	0.731224	0.975825	29	19264	40597	0.474518	0.633248
30	9780	12439	0.786237	1.04924	30	48909	65213	0.749988	1.00087	30	27641	50029	0.5525	0.737316	30	21175	46577	0.454624	0.606699	30	11458	29342	0.390498	0.521123	30	54514	78194	0.697163	0.930371	30	16200	36803	0.440182	0.587426
31	20173	23291	0.866129	1.15586	31	46524	79064	0.588435	0.785271	31	20835	35015	0.595031	0.794074	31	20370	40083	0.508195	0.678191	31	27370	42120	0.64981	0.867177	31	57391	78946	0.726965	0.970142	31	24157	46546	0.518992	0.692599
32	15950	21248	0.750659	1.00176	32	60144	95125	0.632263	0.84376	32	30165	48959	0.616128	0.822228	32	12067	34883	0.345928	0.461644	32	17196	42199	0.407498	0.543809	32	53673	84916	0.632072	0.843505	32	24809	45819	0.541457	0.722579
33	15024	20051	0.749289	0.999933	33	16452	40251	0.408735	0.545461	33	20251	42860	0.472492	0.630545	33	20752	41546	0.499495	0.66658	33	16237	33151	0.489789	0.653628	33	57492	88926	0.646515	0.86278	33	23159	44348	0.522211	0.696895
34	17853	23319	0.765599	1.0217	34	16682	35739	0.466773	0.622913	34	18036	33989	0.530642	0.708147	34	20005	42247	0.473525	0.631923	34	9259	27974	0.330986	0.441704	34	49748	72858	0.682808	0.911213	34	21036	39745	0.529274	0.706321
35	20315	26809	0.757768	1.01125	35	14336	37694	0.380326	0.507548	35	28525	47095	0.605691	0.808299	35	14079	40184	0.350363	0.467563	35	61151	80372	0.76085	1.01536	35	58047	80020	0.725406	0.968061	35	8287	24901	0.332798	0.444122
36	19018	32422	0.586577	0.782792	36	15986	37044	0.431541	0.575895	36	23613	38904	0.606956	0.809988	36	18361	40346	0.455088	0.60732	36	71692	78119	0.917728	1.22472	36	51753	87169	0.593709	0.79231	36	39270	55924	0.702203	0.937096
37	8641	11752	0.735279	0.981236	37	14354	35330	0.406284	0.542189	37	57163	79104	0.722631	0.964357	37	15884	35773	0.444022	0.592551	37	53623	71432	0.750686	1.0018	37	13717	37108	0.369651	0.493302	37	60455	76621	0.789013	1.05295
38	57493	65313	0.880269	1.17473	38	46333	73170	0.633224	0.845043	38	54098	72551	0.745655	0.995083	38	18743	40820	0.459162	0.612756	38	45636	63971	0.713386	0.95202	38	49635	73013	0.67981	0.907213	38	62701	81980	0.764833	1.02068
39	41533	47263	0.878764	1.17272	39	26500	44581	0.594424	0.793264	39	67594	86806	0.778679	1.03915	39	17309	41085	0.421297	0.562225	39	62256	83123	0.748962	0.999497	39	20676	37350	0.553574	0.73875	39	64678	83069	0.778606	1.03906
40	48887	55267	0.88456	1.18045	40	62335	85068	0.732767	0.977884	40	55925	74614	0.749524	1.00025	40	26243	43369	0.60511	0.807524	40	53946	82052	0.657461	0.877388	40	55434	77200	0.718057	0.958253	40	63702	84293	0.755721	1.00852
41	45977	65794	0.698802	0.932558	41	19665	44355	0.443355	0.591661	41	69382	85694	0.809648	1.08048	41	22373	46755	0.478516	0.638583	41	53405	69025	0.773705	1.03252	41	15507	46806	0.331304	0.442128	41	53257	74691	0.713031	0.951546
		Ratio mean	0.749339
			Mean	1				Mean	0.667495				Mean	0.775113				Mean	0.643285				Mean	0.859497				Mean	0.681828				Mean	0.837908
			Std. Deviation	0.120528				Std. Deviation	0.129491				Std. Deviation	0.189221				Std. Deviation	0.0914076				Std. Deviation	0.212298				Std. Deviation	0.192565				Std. Deviation	0.207284

## Sheet: Figure 6 supplement B
	Septated cells
	Wild type -GSH		Wild type +GSH		rlc1(S35A)-GSH		rlc1(S35A) +GSH		Myo2.E1 -GSH		Myo2.E1 +GSH
Replicate 1	20.6897		24.4898		28.7037		20.1923		38.8349		31.6327
Replicate 2	20.2128		22.8261		26.6667		23.301		33.3333		32.7273
Replicate 3	21.4286		22.549		29.4118		24.0741		36.1111		29.3478
Mean	20.777		23.2883		28.2607		22.5225		36.0931		31.2359
Std. Deviation	0.612588		1.04971		1.42515		2.05465		2.75085		1.7243
	Multiseptated cells
	Wild type -GSH		Wild type +GSH		rlc1(S35A)-GSH		rlc1(S35A) +GSH		Myo2.E1 -GSH		Myo2.E1 +GSH
Replicate 1	0	0	0	0	5.55556	5.55556	0	0	17.4757	17.4757	8.16327	8.16327
Replicate 2	1.06383	1.06383	0	0	3.80952	3.80952	0	0	13.8889	13.8889	5.45455	5.45455
Replicate 3	0	0	0.980392	0.980392	6.72269	6.72269	0	0	12.037	12.037	4.34783	4.34783
Mean	0.35461		0.326797		5.36259		0		14.4672		5.98855
Std. Deviation	0.549359		0.506272		1.31135		0		2.47317		1.75574
